# Supplementary material for: Calix[4]pyrrolato gallate: square planar-coordinated gallium(iii) and its metal–ligand cooperative reactivity with CO2 and alcohols
Source: Royal Society of Chemistry journal article supplement (doi:10.1039/d2sc03054c), 2022-01-01
Supplement: d2sc03054c1.pdf [file d2sc03054c1.pdf]

# Electronic Supplementary Information

## **Calix[4]pyrrolato gallate: square planar-coordinated gallium(III) and its metal-ligand cooperative reactivity with CO<sub>2</sub> and alcohols**

Lukas M. Sigmund, Nick Richert<sup>§</sup>, Eliane Engels<sup>§</sup>, Lutz Greb\*

<sup>§</sup> These authors contributed equally to this work.

Correspondence to: [greb@uni-heidelberg.de](mailto:greb@uni-heidelberg.de)

## Table of Contents

|      |                                                                                                                          |     |
|------|--------------------------------------------------------------------------------------------------------------------------|-----|
| S1.  | Materials and methods .....                                                                                              | S3  |
| S2.  | Synthesis and characterization of the calix[4]pyrrolato ligands and of tetraphenylphosphonium tetrachloridogallate ..... | S4  |
| S3.  | Synthesis and characterization of the calix[4]pyrrolato gallates .....                                                   | S7  |
| S4.  | Fluoride adduct formation .....                                                                                          | S9  |
| S5.  | Reactivity with CO <sub>2</sub> .....                                                                                    | S10 |
| S6.  | Reactivity with HNTf <sub>2</sub> and isopropanol .....                                                                  | S13 |
| S7.  | X-ray crystallography .....                                                                                              | S17 |
| S8.  | Computational details and results .....                                                                                  | S27 |
| S9.  | NMR spectra .....                                                                                                        | S30 |
| S10. | IR spectra .....                                                                                                         | S52 |
| S11. | Xyz coordinates and energies from DFT calculations .....                                                                 | S53 |
| S12. | References .....                                                                                                         | S86 |

## S1. Materials and methods

All reagents and solvents used within this research project were purchased from commercial sources. Carbon dioxide gas (99.998%) was obtained from Air Liquide and was used without further purification. Unless otherwise noted, all manipulations were carried out under inert conditions. Solvents were degassed prior to use with four freeze-pump-thaw cycles and were stored in sealed Schlenk ampulla over activated molecular sieve (3 or 4 Å, respectively) under a dry argon atmosphere. All reactions on preparative scale were carried out in flame-dried standard laboratory glassware under a dry argon or nitrogen atmosphere using Schlenk line techniques and were permanently magnetically stirred, if not stated differently. Syringes, magnetic stirring bars, and needles were dried and/or flushed with argon prior to use. Reactions on the NMR sample scale were done in dry J. Young NMR tubes under a dry nitrogen atmosphere. Compounds sensitive to ambient conditions were handled and stored in a Sylatech glove box filled with dry nitrogen gas. Removal of solvents *in vacuo* was performed using a Heidolph VV2000 rotary evaporator or a Schlenk line. Literature-known compounds were synthesized following published procedures. The respective publications are cited below. Analytical data of known compounds were compared to reference data and were found to be consistent in all cases. Novel compounds were characterized to the reported structures and compositions to the best of our knowledge.

Nuclear magnetic resonance (NMR) spectra were collected with a Bruker DPX200, a Bruker Avance II 400, or a Bruker Avance III 600 spectrometers at 295 K. The Bruker Avance machines were operated by the NMR facility of the Inorganic Chemistry Department at Heidelberg University. All spectra were acquired with field-frequency lock on the  $^2\text{H}$  signal of the used solvent prior to data collection. Chemical shifts  $\delta$  of  $^1\text{H}$  and  $^{13}\text{C}$  nuclei are given in parts per million (ppm) relative to the tetramethylsilane resonance;  $^{19}\text{F}$  and  $^{31}\text{P}$  chemical shifts (in ppm) are reported relative to the trichlorofluoromethane and the  $\text{H}_3\text{PO}_4$  (85% aq) reference system, respectively.  $^1\text{H}$  and  $^{13}\text{C}\{^1\text{H}\}$  spectra were calibrated after data processing on the solvent residual signals ( $\text{CD}_2\text{Cl}_2$ :  $^1\text{H}$ : 5.32 ppm,  $^{13}\text{C}$ : 53.84 ppm,  $\text{THF-d}_8$ :  $^1\text{H}$ : 3.58 ppm,  $^{13}\text{C}$ : 67.21 ppm,  $\text{CD}_3\text{CN}$ :  $^1\text{H}$ : 1.94 ppm,  $^{13}\text{C}$ : 1.32 ppm).<sup>1</sup>  $^{19}\text{F}$  and  $^{31}\text{P}$  NMR spectra were not manually calibrated after processing. Signal multiplicities are reported as s (singlet), d (doublet), t (triplet), q (quartet), sept (septet), dd (doublet of doublets), tq (triplet of quartets), and m (multiplet); "br" stand for a broadened signal. The protons of the aromatic pyrrole rings of the calix[4]pyrrolato ligands are denoted " $\beta\text{-H}$ ", the directly attached carbon atoms " $\beta\text{-C}$ ". The quaternary carbon atoms of the aromatic pyrrole rings in the ligand are named " $\text{C}_q\text{-pyrrole}$ ". The atoms of the ligand's methyl and methylene (in case of the *meso*-octaethyl ligand) groups are called " $\alpha\text{-Me}$ " and " $\alpha\text{-methylene}$ ", respectively. The quaternary carbon atoms to which they are bound are denoted " $\alpha\text{-C}$ ". NMR spectra were processed with TopSpin 4.0.7<sup>2</sup> and plotted with MestReNova v14.0.1-23559<sup>3</sup>.

High resolution mass spectrometry (HR-MS) was done with a Bruker ApexQe FT-ICR instrument coupled to an electrospray ionization (ESI) source operating in negative ion mode. Samples were prepared with dichloromethane as solvent under inert conditions with an approximate analyte concentration of  $c = 10^{-5} \text{ mol L}^{-1}$ . They were immediately analyzed after being brought in contact with air.

Fourier-transform attenuated total reflection infrared spectroscopy (FT-ATR-IR) was done with an Agilent Cary 630 spectrometer with solid material at room temperature inside a dry nitrogen-filled glove box. The obtained spectra were manually baseline-corrected.

Data is reported as: maximum wavenumber  $\tilde{\nu}_{max}$  [ $\text{cm}^{-1}$ ] of the respective absorption band, intensity (s = strong, m = medium, w = weak).

For data handling and plotting OriginPro 2020<sup>4</sup> was used.

All quantum chemical calculations were done with Orca 5.0.1.<sup>5-6</sup> Details on the applied computational methods are given in Chapter S8.

## S2. Synthesis and characterization of the calix[4]pyrrolato ligands and of tetraphenylphosphonium tetrachloridogallate

*meso*-Octamethylcalix[4]pyrrole and *meso*-octaethylcalix[4]pyrrole were prepared as described below following modified procedures from literature (Scheme S1).<sup>7-8</sup> Deprotonation was achieved with sodium bis(trimethylsilyl)amide (NaHMDS) as described in the literature.<sup>9</sup> Tetraphenylphosphonium tetrachloridogallate was synthesized from tetraphenylphosphonium chloride and gallium(III)chloride following a reported procedure.<sup>10</sup>

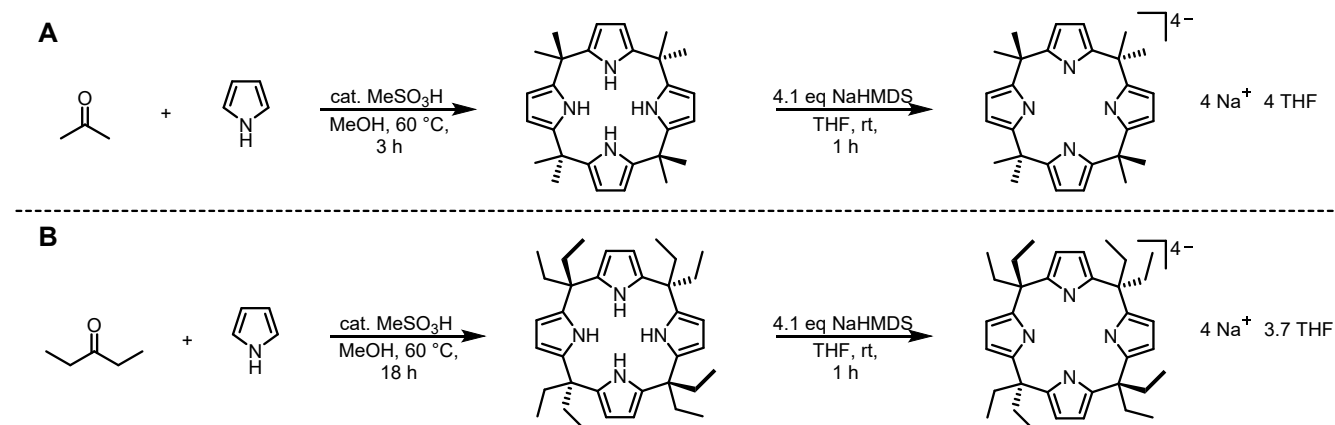

**Scheme S1.** Synthetic schemes for the preparation of **A**) *meso*-octamethylcalix[4]pyrrole and **B**) *meso*-octaethylcalix[4]pyrrole and their subsequent deprotonation with sodium bis(trimethylsilyl)amide (NaHMDS) to give their tetrasodium salts.

### *meso*-Octamethylcalix[4]pyrrole

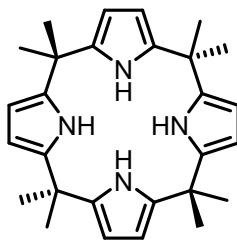

**Procedure.**<sup>7-8</sup> In a 500 mL round-bottom flask equipped with a reflux condenser, acetone (13.00 g, 16.5 mL, 223.6 mmol, 1.0 eq) was dissolved in methanol (160 mL). Pyrrole (15.00 g, 15.5 mL, 223.6 mmol, 1.0 eq), which was freshly distilled, was added in one portion. Methanesulfonic acid (4 drops) was added to the colorless solution. While the mixture was heated to 60 °C for 3 h, a colorless solid precipitated. The reaction mixture was allowed to cool down to room temperature. The solvent was removed under reduced pressure. A pale green solid was obtained as the crude reaction product, which was purified by flash column chromatography on silica gel with dichloromethane/petroleum ether (60:40, *R<sub>f</sub>* = 0.53) as eluent. The solvent was removed from the combined product fractions and *meso*-octamethylcalix[4]pyrrole was isolated after drying under reduced pressure as a pale brown solid (13.7 g, 32.0 mmol, 57% yield), which is stable to ambient conditions.

**<sup>1</sup>H NMR** (399.9 MHz, CD<sub>2</sub>Cl<sub>2</sub>, 295 K):  $\delta_{1H}$  [ppm] = **7.02** (br s, 4H, N-H), **5.88** (d, <sup>3</sup>*J*<sub>HH</sub> = 2.8 Hz, 8H,  $\beta$ -H), **1.49** (s, 24H,  $\alpha$ -Me).

**<sup>13</sup>C{<sup>1</sup>H} NMR** (100.1 MHz, CD<sub>2</sub>Cl<sub>2</sub>, 295 K):  $\delta_{13C}$  [ppm] = **138.8** (s, C<sub>q</sub>, C<sub>q</sub>-pyrrole), **103.1** (s, CH,  $\beta$ -C), **35.4** (s, C<sub>q</sub>,  $\alpha$ -C), **28.9** (s, CH<sub>3</sub>,  $\alpha$ -Me).

### meso-Octaethylcalix[4]pyrrole

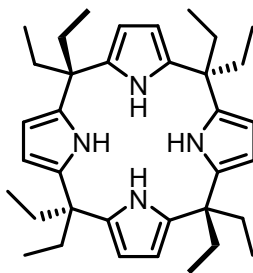

**Procedure.**<sup>7-8</sup> In a 1000 mL round-bottom flask equipped with a reflux condenser, pentan-3-one (25.7 g, 31.5 mL, 298.1 mmol, 1.0 eq) was dissolved in methanol (320 mL). Pyrrole (20.0 g, 20.1 mL, 298.1 mmol, 1.0 eq) and catalytic amounts of methanesulfonic acid (8 drops) were added. Upon stirring for 18 h at 60 °C, the reaction mixture turned dark brown, and a colorless solid precipitated. The crude product was separated by filtration and was washed with methanol (3 × 40 mL). The obtained beige solid was dried under reduced pressure. It was then purified by flash column chromatography on silica gel with dichloromethane/petroleum ether (40:60,  $R_f = 0.59$ ) as eluent. The solvent was removed from the combined product fractions, and after drying under reduced pressure *meso*-octaethylcalix[4]pyrrole was obtained as a colorless solid (18.4 g, 34.0 mmol, 46% yield). It was previously recognized that over several weeks the color of the material changes to pale orange when stored under ambient conditions. Therefore, the compound was brought into a nitrogen-filled glovebox after completion of the synthesis and was stored there.

**<sup>1</sup>H NMR** (600.2 MHz,  $CD_2Cl_2$ , 295 K):  $\delta_{1H}$  [ppm] = **6.90** (br s, 4H, N-H), **5.90** (d,  $^3J_{HH} = 2.6$  Hz, 8H,  $\beta$ -H), **1.80** (br s, 16H,  $\alpha$ -methylene), **0.58** (t,  $^3J_{HH} = 7.4$  Hz, 24H,  $\alpha$ -Me).

**<sup>13</sup>C{<sup>1</sup>H} NMR** (150.9 MHz,  $CD_2Cl_2$ , 295 K):  $\delta_{13C}$  [ppm] = **136.5** (s,  $C_q$ ,  $C_q$ -pyrrole), **105.1** (s, CH,  $\beta$ -C), **43.1** (s,  $C_q$ ,  $\alpha$ -C), **28.4** (s,  $CH_2$ ,  $\alpha$ -methylene), **8.0** (s,  $CH_3$ ,  $\alpha$ -Me).

### Deprotonation of *meso*-octamethylcalix[4]pyrrole to give its tetrasodium salt

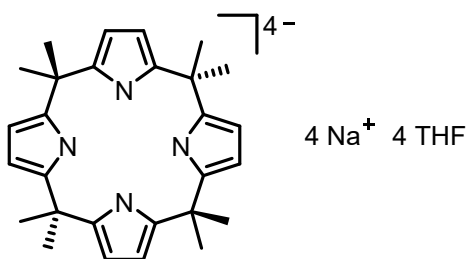

**Procedure.**<sup>9</sup> *meso*-Octamethylcalix[4]pyrrole (1.0 g, 2.33 mmol, 1.0 eq) was dissolved in THF (20 mL) in a Schlenk tube. Sodium bis(trimethylsilyl)amide (1 M solution in THF, 9.6 mL, 9.57 mmol, 4.1 eq) was added dropwise to the rapidly stirring solution within 5 min at room temperature. After approximately four fifths of the solution were added, a colorless precipitate formed. After complete addition, the reaction was stirred for 1 h at room temperature. The mixture was filtered over a fritted glass filter inside a nitrogen-filled glove box. The obtained solid was washed with THF (3 × 7 mL). Drying for 30 min under reduced pressure afforded the desired product as a colorless solid (1.8 g, 2.23 mmol, 95% yield). The acquired <sup>1</sup>H NMR spectrum showed the presence of four equivalents of THF as well as slight contamination. However, the material was found sufficient for subsequent usage.

**<sup>1</sup>H NMR** (600.2 MHz,  $DMSO-d_6$ , 295 K):  $\delta_{1H}$  [ppm] = **5.38** (s, 8H,  $\beta$ -H), **3.65-3.58** (m, 4 × 4H, THF), **1.80-1.74** (m, 4 × 4H, THF), **1.32** (s, 24H,  $\alpha$ -Me).

**<sup>13</sup>C{<sup>1</sup>H} NMR** (150.9 MHz,  $DMSO-d_6$ , 295 K):  $\delta_{13C}$  [ppm] = **148.8** (s,  $C_q$ ,  $C_q$ -pyrrole), **96.5** (s, CH,  $\beta$ -C), **67.0** (s, CH, THF), **38.3** (s,  $C_q$ ,  $\alpha$ -C), **33.1** (s,  $CH_3$ ,  $\alpha$ -Me), **25.2** (s, CH, THF).

### Deprotonation of *meso*-octaethylcalix[4]pyrrole to give its tetrasodium salt

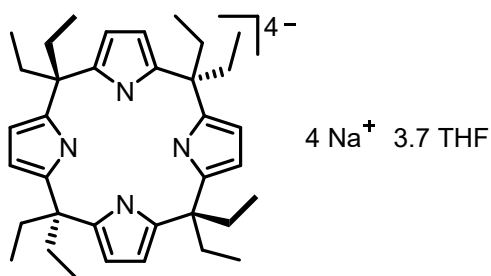

**Procedure.**<sup>9</sup> *meso*-Octaethylcalix[4]pyrrole (600 mg, 1.11 mmol, 1.0 eq) was dissolved in THF (6 mL) in a Schlenk tube. Sodium bis(trimethylsilyl)amide (1 M solution in THF, 4.6 mL, 4.55 mmol, 4.1 eq) was added dropwise to the rapidly stirring solution within 5 min at room temperature. The clear solution was stirred for 1 h at room temperature, and the solvent was evaporated at reduced pressure. The obtained solid was suspended in *n*-hexane (6 mL) and was filtered over a fritted glass filter inside a nitrogen-filled glove box. The obtained solid was washed with *n*-hexane (4 × 4 mL). Further purification was achieved by dissolving the entire material in THF (5 mL) and subsequent precipitation with *n*-pentane (approximately 80 mL). The solid was isolated by filtration using a fritted glass filter. After drying *in vacuo* for 30 min, the desired product was obtained as colorless solid (566 mg, 0.62 mmol, 57% yield). The acquired <sup>1</sup>H NMR spectrum showed the presence of 3.7 equivalents of THF as well as slight contamination. However, the material was found sufficient for subsequent usage.

**<sup>1</sup>H NMR** (600.2 MHz, DMSO-*d*<sub>6</sub>, 295 K):  $\delta_{1H}$  [ppm] = **5.35** (s, 8H,  $\beta$ -H), **3.63-3.56** (m, 3.7 × 4H, THF), **1.80-1.73** (m, 3.7 × 4H, THF), **1.65** (br q, <sup>3</sup>*J*<sub>HH</sub> = 6.7 Hz, 16H,  $\alpha$ -methylene), **0.45** (t, <sup>3</sup>*J*<sub>HH</sub> = 6.7 Hz, 24H,  $\alpha$ -Me).

**<sup>13</sup>C{<sup>1</sup>H} NMR** (150.9 MHz, DMSO-*d*<sub>6</sub>, 295 K):  $\delta_{13C}$  [ppm] = **147.7** (s, C<sub>q</sub>, C<sub>q</sub>-pyrrole), **97.2** (s, CH,  $\beta$ -C), **67.0** (s, CH, THF), **45.4** (s, C<sub>q</sub>,  $\alpha$ -C), **28.7** (s, CH<sub>2</sub>,  $\alpha$ -methylene), **25.2** (s, CH, THF), **9.3** (s, CH<sub>3</sub>,  $\alpha$ -Me).

### Tetraphenylphosphonium tetrachloridogallate(III) ([PPh<sub>4</sub>][GaCl<sub>4</sub>])

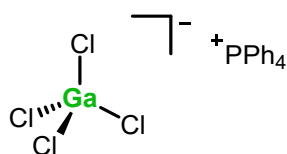

**Procedure.**<sup>10</sup> Gallium trichloride (1.00 g, 5.68 mmol, 1.0 eq) was dissolved in ice-cold concentrated hydrochloric acid (35 mL). Dry tetraphenylphosphonium chloride (2.13 g, 5.68 mmol, 1.0 eq) was dissolved in ethanol (25 mL). The latter solution was added to the former. This caused the immediate precipitation of a colorless solid. The mixture was stirred for 10 min at room temperature. The solid was isolated by filtration using a Büchner funnel. It was washed with ethanol (in total 60 mL over several washing steps) and diethyl ether (in total 40 mL over several washing steps). The product was obtained as a colorless solid after drying *in vacuo* (2.87 g, 5.20 mmol, 92% yield).

**<sup>1</sup>H NMR** (600.2 MHz, CD<sub>2</sub>Cl<sub>2</sub>, 295 K):  $\delta_{1H}$  [ppm] = **7.96-7.90** (m, 4H, [PPh<sub>4</sub>]<sup>+</sup>), **7.80-7.72** (m, 8H, [PPh<sub>4</sub>]<sup>+</sup>), **7.66-7.59** (m, 8H, [PPh<sub>4</sub>]<sup>+</sup>).

**<sup>13</sup>C{<sup>1</sup>H} NMR** (151.9 MHz, CD<sub>2</sub>Cl<sub>2</sub>, 295 K),  $\delta_{13C}$  [ppm] = **136.1** (d, CH, <sup>4</sup>*J*<sub>PC</sub> = 3.0 Hz, [PPh<sub>4</sub>]<sup>+</sup>), **134.8** (d, CH, <sup>2</sup>*J*<sub>PC</sub> = 10.3 Hz, [PPh<sub>4</sub>]<sup>+</sup>), **131.0** (d, CH, <sup>3</sup>*J*<sub>PC</sub> = 12.9 Hz, [PPh<sub>4</sub>]<sup>+</sup>), **117.9** (d, C<sub>q</sub>, <sup>1</sup>*J*<sub>PC</sub> = 89.7 Hz, [PPh<sub>4</sub>]<sup>+</sup>).

**<sup>31</sup>P{<sup>1</sup>H} NMR** (243.0 MHz, CD<sub>2</sub>Cl<sub>2</sub>, 295 K),  $\delta_{31P}$  [ppm] = **23.3** (s, [PPh<sub>4</sub>]<sup>+</sup>).

**<sup>71</sup>Ga{<sup>1</sup>H} NMR** (183.0 MHz, CD<sub>2</sub>Cl<sub>2</sub>, 295 K),  $\delta_{71Ga}$  [ppm] = **250.9** (s, GaCl<sub>4</sub><sup>-</sup>).

### S3. Synthesis and characterization of the calix[4]pyrrolato gallates

Tetraphenylphosphonium meso-octamethylcalix[4]pyrrolato gallate ([PPh<sub>4</sub>]<sup>+</sup>[Me<sup>-</sup>1])

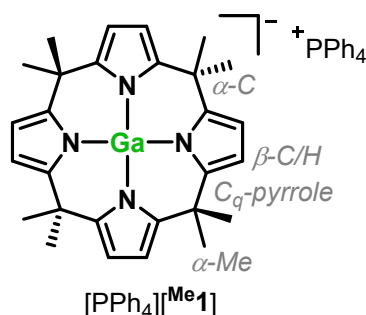

**Procedure.** In a nitrogen-filled glove box, the tetrasodium salt of deprotonated meso-octamethylcalix[4]pyrrole (500 mg, 0.62 mmol, 1.0 eq) was dissolved in 1,2-dimethoxyethane (DME, 5 mL). [PPh<sub>4</sub>][GaCl<sub>4</sub>] (332 mg, 0.60 mmol, 0.97 eq) was added in one portion at room temperature. The reaction mixture turned intensively red. It was stirred for 3 h at room temperature. Over time, the color changed to pale orange and a colorless precipitate formed. The solid was separated from the orange solution by filtration over a fritted glass filter. It was washed with DME (3 × 2 mL) and *n*-pentane (2 × 2 mL) and was subsequently suspended in CH<sub>2</sub>Cl<sub>2</sub> (5 mL). The suspension was stirred for 5 min at room temperature. It was filtered over a fritted glass filter covered with a pad of celite to remove NaCl. The product was isolated from its CH<sub>2</sub>Cl<sub>2</sub> solution by precipitation with *n*-pentane (approximately 20 mL) and subsequent filtration. After drying *in vacuo*, it was obtained as a pale rose solid (390 mg, 0.43 mmol, 69% yield). The material was found to contain 0.9 equivalents of CH<sub>2</sub>Cl<sub>2</sub> as determined by <sup>1</sup>H NMR spectroscopy using CDCl<sub>3</sub> as solvent. This is consistent with the obtained result from elemental analysis.

**<sup>1</sup>H NMR** (600.2 MHz, CD<sub>2</sub>Cl<sub>2</sub>, 295 K), δ<sub>1H</sub> [ppm] = **7.89-7.84** (m, 4H, [PPh<sub>4</sub>]<sup>+</sup>), **7.72-7.66** (m, 8H, [PPh<sub>4</sub>]<sup>+</sup>), **7.60-7.53** (m, 8H, [PPh<sub>4</sub>]<sup>+</sup>), **5.79** (s, 8H, β-H), **1.65** (s, 12H, α-Me), **1.46** (s, 12H, α-Me).

**<sup>13</sup>C{<sup>1</sup>H} NMR** (151.9 MHz, CD<sub>2</sub>Cl<sub>2</sub>, 295 K), δ<sub>13C</sub> [ppm] = **146.2** (s, C<sub>q</sub>, C<sub>q</sub>-pyrrole), **136.2** (d, CH, <sup>4</sup>J<sub>PC</sub> = 3.0 Hz, [PPh<sub>4</sub>]<sup>+</sup>), **134.8** (d, CH, <sup>2</sup>J<sub>PC</sub> = 10.3 Hz, [PPh<sub>4</sub>]<sup>+</sup>), **131.0** (d, CH, <sup>3</sup>J<sub>PC</sub> = 12.9 Hz, [PPh<sub>4</sub>]<sup>+</sup>), **117.8** (d, C<sub>q</sub>, <sup>1</sup>J<sub>PC</sub> = 89.6 Hz, [PPh<sub>4</sub>]<sup>+</sup>), **100.7** (s, CH, β-C), **42.4** (s, C<sub>q</sub>, α-C), **35.6** (s, CH<sub>3</sub>, α-Me), **25.0** (s, CH<sub>3</sub>, α-Me).

**<sup>31</sup>P{<sup>1</sup>H} NMR** (161.9 MHz, CD<sub>2</sub>Cl<sub>2</sub>, 295 K), δ<sub>31P</sub> [ppm] = **23.2** (s, [PPh<sub>4</sub>]<sup>+</sup>).

**HR-MS** (ESI, negative ion mode): *m/z* calculated for C<sub>28</sub>H<sub>32</sub><sup>69</sup>GaN<sub>4</sub> [M]<sup>-</sup>: **493.1888**, found: **493.1877**.

**FT-ATR-IR** (solid state, room temperature),  $\tilde{\nu}_{max}$  [cm<sup>-1</sup>] = **3094** (w), **3040** (w), **2966** (m), **2937** (m), **2902** (m), **2867** (w), **2840** (w), **1613** (w), **1587** (w), **1485** (m), **1460** (w), **1435** (s), **1371** (s), **1348** (s), **1316** (w), **1303** (w), **1278** (s), **1263** (s), **1224** (m), **1213** (m), **1190** (w), **1153** (s), **1107** (s), **1064** (s), **994** (m), **929** (w), **890** (w), **854** (w), **807** (w), **756** (s), **723** (s), **688** (s).

**Elemental analysis:** calc. **C 69.81, H 5.96, N 6.16** ([PPh<sub>4</sub>]<sup>+</sup>[Me<sup>-</sup>1] · 0.9 CH<sub>2</sub>Cl<sub>2</sub>), found: **C 69.80, H 5.71, N 6.59** (content of CH<sub>2</sub>Cl<sub>2</sub> was verified by <sup>1</sup>H NMR spectroscopy in CDCl<sub>3</sub>).

Tetraphenylphosphonium *meso*-octaethylcalix[4]pyrrolato gallate ([PPh<sub>4</sub>]<sup>+</sup>[Et1]<sup>-</sup>)

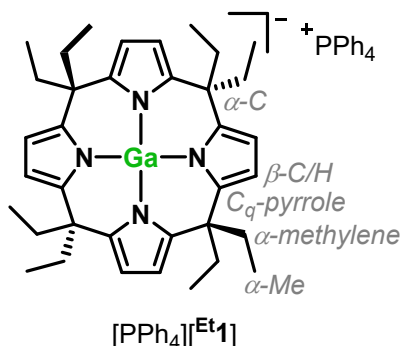

**Procedure.** In a nitrogen-filled glove box, the tetrasodium salt of deprotonated *meso*-octaethylcalix[4]pyrrole (200 mg, 0.22 mmol, 1.0 eq) was dissolved in 1,2-dimethoxyethane (DME, 2 mL). [PPh<sub>4</sub>][GaCl<sub>4</sub>] (119 mg, 0.22 mmol, 0.97 eq) was added in one portion at room temperature. The reaction mixture turned intensively red. It was stirred for 3 h at room temperature. Over time, the color changed to pale orange and a colorless precipitate formed. The solid was separated from the orange solution by filtration over a fritted glass filter. It was washed with DME (3 × 0.5 mL) and *n*-pentane (2 × 1 mL) and was subsequently suspended in CH<sub>2</sub>Cl<sub>2</sub> (3 mL). The suspension was stirred for 5 min at room temperature. It was filtered over a fritted glass filter covered with a pad of celite to remove NaCl. The product was isolated from its CH<sub>2</sub>Cl<sub>2</sub> solution by precipitation with *n*-pentane (approximately 20 mL) and subsequent filtration. After drying *in vacuo*, it was obtained as a slightly pale rose solid (120 mg, 0.13 mmol, 57% yield).

**<sup>1</sup>H NMR** (600.2 MHz, CD<sub>2</sub>Cl<sub>2</sub>, 295 K), δ<sub>1H</sub> [ppm] = **7.90-7.84** (m, 4H, [PPh<sub>4</sub>]<sup>+</sup>), **7.73-7.66** (m, 8H, [PPh<sub>4</sub>]<sup>+</sup>), **7.61-7.53** (m, 8H, [PPh<sub>4</sub>]<sup>+</sup>), **5.77** (s, 8H, β-H), **2.04** (q, <sup>3</sup>J<sub>HH</sub> = 7.3 Hz, 8H, α-methylene), **1.48** (q, <sup>3</sup>J<sub>HH</sub> = 7.2 Hz, 8H, α-methylene), **1.07** (t, <sup>3</sup>J<sub>HH</sub> = 7.2 Hz, 12H, α-Me), **0.52** (t, <sup>3</sup>J<sub>HH</sub> = 7.2 Hz, 12H, α-Me).

**<sup>13</sup>C{<sup>1</sup>H} NMR** (151.9 MHz, CD<sub>2</sub>Cl<sub>2</sub>, 295 K), δ<sub>13C</sub> [ppm] = **143.2** (s, C<sub>q</sub>, C<sub>q</sub>-pyrrole), **136.2** (d, CH, <sup>4</sup>J<sub>PC</sub> = 3.0 Hz, [PPh<sub>4</sub>]<sup>+</sup>), **134.7** (d, CH, <sup>2</sup>J<sub>PC</sub> = 10.3 Hz, [PPh<sub>4</sub>]<sup>+</sup>), **131.0** (d, CH, <sup>3</sup>J<sub>PC</sub> = 12.9 Hz, [PPh<sub>4</sub>]<sup>+</sup>), **117.8** (d, C<sub>q</sub>, <sup>1</sup>J<sub>PC</sub> = 89.6 Hz, [PPh<sub>4</sub>]<sup>+</sup>), **102.4** (s, CH, β-C), **44.5** (s, C, α-methylene), **43.7** (s, C<sub>q</sub>, α-C), **27.4** (s, CH<sub>2</sub>, α-methylene), **10.5** (s, CH<sub>3</sub>, α-Me), **10.2** (s, CH<sub>3</sub>, α-Me).

**<sup>31</sup>P{<sup>1</sup>H} NMR** (243.0 MHz, CD<sub>2</sub>Cl<sub>2</sub>, 295 K), δ<sub>31P</sub> [ppm] = **23.3** (s, [PPh<sub>4</sub>]<sup>+</sup>).

**HR-MS** (ESI, negative ion mode): *m/z* calculated for C<sub>36</sub>H<sub>48</sub><sup>69</sup>GaN<sub>4</sub> [M]<sup>-</sup>: **605.3135**, found: **605.3154**.

**FT-ATR-IR** (solid state, room temperature),  $\tilde{\nu}_{max}$  [cm<sup>-1</sup>] = **3087** (w), **3056** (w), **2959** (m), **2923** (m), **2869** (m), **2834** (w), **1587** (m), **1483** (m), **1454** (m), **1439** (s), **1374** (s), **1319** (s), **1292** (m), **1246** (m), **1188** (w), **1149** (m), **1108** (s), **1073** (s), **1026** (m), **996** (m), **971** (m), **924** (m), **883** (m), **858** (m), **749** (s), **719** (s), **688** (s).

**Elemental analysis:** calc. **C 76.19, H 7.25, N 5.92**, found: **C 76.08, H 7.04, N 5.96**.



## S4. Fluoride adduct formation

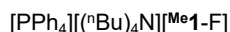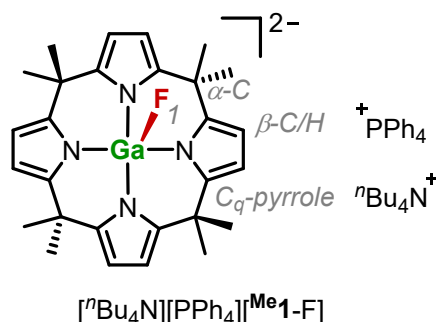

**Procedure.** In a nitrogen-filled glove box, tetraphenylphosphonium *meso*-octamethylcalix[4]pyrrolato gallate (15.0 mg, 16.48  $\mu\text{mol}$  (0.9 eq of residual  $\text{CH}_2\text{Cl}_2$  included), 1.0 eq) and tetrabutylammonium difluorotriphenylsilicate (8.9 mg, 16.48  $\mu\text{mol}$ , 1.0 eq) were placed in a 10 mL snap cap vial and were dissolved in acetonitrile (1 mL) at room temperature. A pale-orange solution was obtained, which was stirred at room temperature for 4 h. Diethyl ether (3 mL) was added. Upon further addition of *n*-pentane (10 mL) an orange oil formed, which was separated by centrifugation. The clear and colorless supernatant was removed. The oil was washed with *n*-pentane (4  $\times$  1 mL), what transformed it into a dark-orange, sticky solid. Drying under reduced pressure over night at room temperature gave the desired product as an orange solid (14.6 mg, 13.33  $\mu\text{mol}$ , 80% yield).

A sample for mass spectrometry was prepared by mixing *meso*-octamethylcalix[4]pyrrolato gallate (7.0 mg, 7.69  $\mu\text{mol}$  (0.9 eq of residual  $\text{CH}_2\text{Cl}_2$  included), 1.0 eq) and tetrabutylammonium difluorotriphenylsilicate (12.5 mg, 23.07  $\mu\text{mol}$ , 3.0 eq) in  $\text{CH}_2\text{Cl}_2$  (0.5 mL). This solution was diluted with  $\text{CH}_2\text{Cl}_2$  to approximately reach a concentration of  $c = 10^{-5} \text{ mol L}^{-1}$  and was subsequently analyzed. However, it was later noted that the fluoro adduct of  $[\text{Me}1]^-$  is significantly more stable in acetonitrile.

**$^1\text{H}$  NMR** (600.2 MHz,  $\text{CD}_3\text{CN}$ , 295 K),  $\delta_{1\text{H}}$  [ppm] = **7.93-7.87** (m, 4H,  $[\text{PPh}_4]^+$ ), **7.76-7.70** (m, 8H,  $[\text{PPh}_4]^+$ ), **7.70-7.63** (m, 8H,  $[\text{PPh}_4]^+$ ), **5.66** (d,  $^3J_{\text{HH}} = 2.9 \text{ Hz}$ , 4H,  $\beta\text{-H}$ ), **5.61** (d,  $^3J_{\text{HH}} = 2.9 \text{ Hz}$ , 4H,  $\beta\text{-H}$ ), **3.12-3.03** (m, 8H,  $[\text{}^n\text{Bu}_4\text{N}]^+$ ), **1.74** (d,  $J_{\text{FH}} = 3.1 \text{ Hz}$ , 6H,  $\alpha\text{-Me}$ ), **1.64-1.56** (m, 8H,  $[\text{}^n\text{Bu}_4\text{N}]^+$ ), **1.61** (s, 6H,  $\alpha\text{-Me}$ ), **1.60** (s, 6H,  $\alpha\text{-Me}$ ), **1.36** (tq,  $^3J_{\text{HH}} = 7.4, 7.4 \text{ Hz}$ , 8H,  $[\text{}^n\text{Bu}_4\text{N}]^+$ ), **1.22** (s, 6H,  $\alpha\text{-Me}$ ), **0.97** (t,  $^3J_{\text{HH}} = 7.4 \text{ Hz}$ , 12H,  $[\text{}^n\text{Bu}_4\text{N}]^+$ ).

**$^{13}\text{C}\{^1\text{H}\}$  NMR** (151.9 MHz,  $\text{CD}_3\text{CN}$ , 295 K),  $\delta_{13\text{C}}$  [ppm] = **148.0** (s,  $\text{C}_q$ ,  $\text{C}_q\text{-pyrrole}$ ), **145.9** (s,  $\text{C}_q$ ,  $\text{C}_q\text{-pyrrole}$ ), **136.4** (d, CH,  $^4J_{\text{PC}} = 3.0 \text{ Hz}$ ,  $[\text{PPh}_4]^+$ ), **135.7** (d, CH,  $^2J_{\text{PC}} = 10.4 \text{ Hz}$ ,  $[\text{PPh}_4]^+$ ), **131.3** (d, CH,  $^3J_{\text{PC}} = 12.9 \text{ Hz}$ ,  $[\text{PPh}_4]^+$ ), **118.9** (d,  $\text{C}_q$ ,  $^1J_{\text{PC}} = 89.7 \text{ Hz}$ ,  $[\text{PPh}_4]^+$ ), **100.2** (s, CH,  $\beta\text{-C}$ ), **98.6** (s, CH,  $\beta\text{-C}$ ), **59.3** (t,  $\text{CH}_2$ ,  $^1J_{\text{NC}} = 2.9 \text{ Hz}$ ,  $[\text{}^n\text{Bu}_4\text{N}]^+$ ), **42.0** (s,  $\text{CH}_3$ ,  $\alpha\text{-Me}$ ), **36.8** (s,  $\text{C}_q$ ,  $\alpha\text{-C}$ ), **36.6** (d,  $\text{CH}_3$ ,  $J_{\text{FC}} = 18.3 \text{ Hz}$ ,  $\alpha\text{-Me}$ ), **36.4** (s,  $\text{C}_q$ ,  $\alpha\text{-C}$ ), **31.7** (s,  $\text{CH}_3$ ,  $\alpha\text{-Me}$ ), **26.9** (s,  $\text{CH}_3$ ,  $\alpha\text{-Me}$ ), **24.3** (s,  $\text{CH}_2$ ,  $[\text{}^n\text{Bu}_4\text{N}]^+$ ), **20.3** (t,  $\text{CH}_2$ ,  $^3J_{\text{NC}} = 1.5 \text{ Hz}$ ,  $[\text{}^n\text{Bu}_4\text{N}]^+$ ), **13.8** (s,  $\text{CH}_3$ ,  $[\text{}^n\text{Bu}_4\text{N}]^+$ ).

**$^{19}\text{F}$  NMR** (376.3 MHz,  $\text{CD}_3\text{CN}$ , 295 K),  $\delta_{19\text{F}}$  [ppm] = **-146.4** (br s, F-1).

**$^{31}\text{P}\{^1\text{H}\}$  NMR** (243.0 MHz,  $\text{CD}_3\text{CN}$ , 295 K),  $\delta_{31\text{P}}$  [ppm] = **22.9** (s,  $[\text{PPh}_4]^+$ ).

**HR-MS** (ESI, negative ion mode):  $m/z$  calculated for  $\text{C}_{28}\text{H}_{35}\text{F}^{69}\text{GaN}_4\text{O} [\text{M}+\text{H}_3\text{O}]^-$ : **531.2056**, found: **531.2075**.

## S5. Reactivity with CO<sub>2</sub>

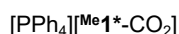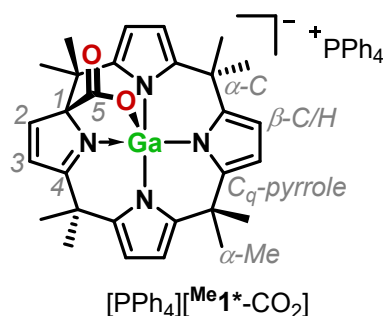

**Procedure.** In a nitrogen-filled glove box, tetraphenylphosphonium *meso*-octamethylcalix[4]pyrrolato gallate (15 mg) was placed in a J. Young NMR pressure tube and was dissolved in CD<sub>2</sub>Cl<sub>2</sub> (0.5 mL). To the sample, gaseous CO<sub>2</sub> (5 bar) was applied at room temperature. The reaction mixture was shaken with a rocking shaker at room temperature for 10 h. Over the course of the reaction, the color of the solution turned to yellow. The sample was analyzed by NMR spectroscopy and mass spectrometry. The ratio between free [Me<sup>1</sup>]<sup>-</sup> and [Me<sup>1</sup>\*-CO<sub>2</sub>]<sup>-</sup> under the reaction conditions was determined to 1:24 by <sup>1</sup>H NMR spectroscopy. CO<sub>2</sub> elimination. The pressure was released from the sample, CH<sub>2</sub>Cl<sub>2</sub> (1 mL) was added, and the solution was transferred by syringe to a normal J. Young NMR tube. The open NMR tube was placed inside a large Schlenk flask. The solvent was slowly evaporated at room temperature over the course of several hours. The obtained solid was kept under static vacuum overnight at room temperature and was analyzed by NMR spectroscopy. A 1:1 ratio between free [Me<sup>1</sup>]<sup>-</sup> and [Me<sup>1</sup>\*-CO<sub>2</sub>]<sup>-</sup> was observed. Subsequently, this process was repeated twice to achieve quantitative CO<sub>2</sub> removal as found by <sup>1</sup>H NMR spectroscopy (see Figure S1).

**<sup>1</sup>H NMR** (600.2 MHz, CD<sub>2</sub>Cl<sub>2</sub>, 295 K),  $\delta_{1H}$  [ppm] = **7.87-7.80** (m, 4H, [PPh<sub>4</sub>]<sup>+</sup>), **7.71-7.63** (m, 8H, [PPh<sub>4</sub>]<sup>+</sup>), **7.65** (1H, H-2, identified by <sup>1</sup>H, <sup>1</sup>H COSY NMR spectroscopy, expected multiplicity is d), **7.60-7.53** (m, 8H, [PPh<sub>4</sub>]<sup>+</sup>), **6.64** (d, <sup>3</sup>J<sub>HH</sub> = 5.0 Hz, 1H, H-3), **5.94** (d, <sup>3</sup>J<sub>HH</sub> = 3.1 Hz, 1H,  $\beta$ -H), **5.91** (d, <sup>3</sup>J<sub>HH</sub> = 3.1 Hz, 1H,  $\beta$ -H), **5.84** (d, <sup>3</sup>J<sub>HH</sub> = 3.1 Hz, 1H,  $\beta$ -H), **5.81** (d, <sup>3</sup>J<sub>HH</sub> = 3.1 Hz, 1H,  $\beta$ -H), **5.79** (d, <sup>3</sup>J<sub>HH</sub> = 3.0 Hz, 1H,  $\beta$ -H), **5.77** (d, <sup>3</sup>J<sub>HH</sub> = 3.0 Hz, 1H,  $\beta$ -H), **1.79** (s, 3H,  $\alpha$ -Me), **1.78** (s, 3H,  $\alpha$ -Me), **1.68** (s, 3H,  $\alpha$ -Me), **1.66** (s, 3H,  $\alpha$ -Me), **1.60** (s, 3H,  $\alpha$ -Me), **1.38** (s, 3H,  $\alpha$ -Me), **1.36** (s, 3H,  $\alpha$ -Me), **0.95** (s, 3H,  $\alpha$ -Me).

**<sup>13</sup>C{<sup>1</sup>H} NMR** (151.9 MHz, CD<sub>2</sub>Cl<sub>2</sub>, 295 K),  $\delta_{13C}$  [ppm] = **184.8** (s, C<sub>q</sub>, C-4), **168.0** (s, C<sub>q</sub>, C-5), **158.1** (s, CH, C-2), **149.0** (s, C<sub>q</sub>, C<sub>q</sub>-pyrrole), **148.3** (s, C<sub>q</sub>, C<sub>q</sub>-pyrrole), **146.2** (s, C<sub>q</sub>, C<sub>q</sub>-pyrrole), **146.1** (s, C<sub>q</sub>, C<sub>q</sub>-pyrrole), **145.6** (s, C<sub>q</sub>, C<sub>q</sub>-pyrrole), **140.0** (s, C<sub>q</sub>, C<sub>q</sub>-pyrrole), **136.2** (d, CH, <sup>4</sup>J<sub>PC</sub> = 3.0 Hz, [PPh<sub>4</sub>]<sup>+</sup>), **134.8** (d, CH, <sup>2</sup>J<sub>PC</sub> = 10.3 Hz, [PPh<sub>4</sub>]<sup>+</sup>), **131.0** (d, CH, <sup>3</sup>J<sub>PC</sub> = 12.9 Hz, [PPh<sub>4</sub>]<sup>+</sup>), **126.6** (s, CH, C-3), **117.9** (d, C<sub>q</sub>, <sup>1</sup>J<sub>PC</sub> = 89.6 Hz, [PPh<sub>4</sub>]<sup>+</sup>), **104.2** (s, CH,  $\beta$ -C), **102.5** (s, CH,  $\beta$ -C), **102.1** (s, CH,  $\beta$ -C), **101.9** (s, CH,  $\beta$ -C), **101.8** (s, CH,  $\beta$ -C), **100.1** (s, CH,  $\beta$ -C), **97.2** (s, C<sub>q</sub>, C-1), **44.1** (s, C<sub>q</sub>,  $\alpha$ -C), **40.8** (s, CH<sub>3</sub>,  $\alpha$ -Me), **38.5** (s, C<sub>q</sub>,  $\alpha$ -C), **36.4** (s, C<sub>q</sub>,  $\alpha$ -C), **36.14** (s, CH<sub>3</sub>,  $\alpha$ -Me), **36.10** (s, C<sub>q</sub>,  $\alpha$ -C), **35.9** (s, CH<sub>3</sub>,  $\alpha$ -Me), **27.4** (s, CH<sub>3</sub>,  $\alpha$ -Me), **27.2** (s, CH<sub>3</sub>,  $\alpha$ -Me), **26.8** (s, CH<sub>3</sub>,  $\alpha$ -Me), **26.6** (s, CH<sub>3</sub>,  $\alpha$ -Me), **24.1** (s, CH<sub>3</sub>,  $\alpha$ -Me).

**<sup>31</sup>P{<sup>1</sup>H} NMR** (243.0 MHz, CD<sub>2</sub>Cl<sub>2</sub>, 295 K),  $\delta_{31P}$  [ppm] = **23.2** (s, [PPh<sub>4</sub>]<sup>+</sup>).

**HR-MS** (ESI, negative ion mode): *m/z* calculated for C<sub>29</sub>H<sub>32</sub><sup>69</sup>GaN<sub>4</sub>O<sub>2</sub> [M]<sup>-</sup>: **537.1781**, found: **537.1769**.

[PPh<sub>4</sub>][<sup>Et</sup>1<sup>-</sup>-CO<sub>2</sub>]

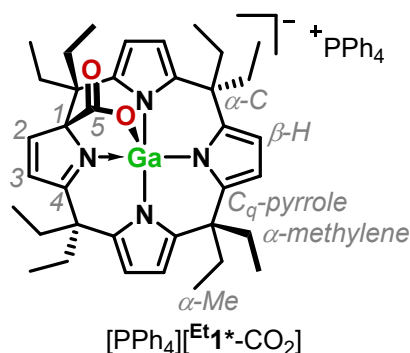

**Procedure.** In a nitrogen-filled glove box, tetraphenylphosphonium *meso*-octaethylcalix[4]pyrrolato gallate (15 mg) was placed in a J. Young NMR pressure tube and was dissolved in CD<sub>2</sub>Cl<sub>2</sub> (0.5 mL). To the sample, gaseous CO<sub>2</sub> (5 bar) was applied. The reaction mixture was shaken with a rocking shaker at room temperature for 10 h. Over the course of the reaction, the color of the solution turned to yellow. The sample was analyzed by NMR spectroscopy. The ratio between free [<sup>Et</sup>1]<sup>-</sup> and [<sup>Et</sup>1<sup>-</sup>-CO<sub>2</sub>]<sup>-</sup> under the reaction conditions was determined to 2:1 by <sup>1</sup>H NMR spectroscopy. Detection of the addition product by mass spectrometry was not possible. CO<sub>2</sub> elimination. The pressure was released from the sample, CH<sub>2</sub>Cl<sub>2</sub> (1 mL) was added, and the solution was transferred by syringe to a normal J. Young NMR tube. The open NMR tube was placed inside a large Schlenk flask. The solvent was slowly evaporated under reduced pressure over the course of several hours at room temperature. The obtained solid was kept under static vacuum overnight at room temperature and was subsequently analyzed by <sup>1</sup>H NMR spectroscopy. Quantitative CO<sub>2</sub> removal was found (see Figure S2).

**<sup>1</sup>H NMR** (600.2 MHz, CD<sub>2</sub>Cl<sub>2</sub>, 295 K), δ<sub>1H</sub> [ppm] = **7.89-7.82** (m, 4H, [PPh<sub>4</sub>]<sup>+</sup>), **7.77** (d, <sup>3</sup>J<sub>HH</sub> = 5.1 Hz, 1H, H-2), **7.72-7.65** (m, 8H, [PPh<sub>4</sub>]<sup>+</sup>), **7.60-7.53** (m, 8H, [PPh<sub>4</sub>]<sup>+</sup>), **6.54** (d, <sup>3</sup>J<sub>HH</sub> = 5.1 Hz, 1H, H-3), **5.95** (d, <sup>3</sup>J<sub>HH</sub> = 3.3 Hz, 1H, β-H), **5.89** (d, <sup>3</sup>J<sub>HH</sub> = 3.1 Hz, 1H, β-H), **5.85** (d, <sup>3</sup>J<sub>HH</sub> = 3.2 Hz, 1H, β-H), **5.81** (d, <sup>3</sup>J<sub>HH</sub> = 3.0 Hz, 1H, β-H), **5.76** (d, <sup>3</sup>J<sub>HH</sub> = 3.1 Hz, 1H, β-H), **5.74** (d, <sup>3</sup>J<sub>HH</sub> = 3.0 Hz, 1H, β-H). Evaluation of the signals of the ethyl groups was not fully possible due to signal overlapping (with unreacted [<sup>Et</sup>1]<sup>-</sup>) and diastereotopicity of the methylene protons. Six of the eight methyl triplets were well resolved: **1.03** (t, <sup>3</sup>J<sub>HH</sub> = 7.4 Hz, 3H, α-Me), **1.00** (t, <sup>3</sup>J<sub>HH</sub> = 7.3 Hz, 3H, α-Me), **0.65** (t, <sup>3</sup>J<sub>HH</sub> = 7.3 Hz, 3H, α-Me), **0.56** (t, <sup>3</sup>J<sub>HH</sub> = 7.4 Hz, 3H, α-Me), **0.48** (t, <sup>3</sup>J<sub>HH</sub> = 7.4 Hz, 3H, α-Me), **0.39** (t, <sup>3</sup>J<sub>HH</sub> = 7.3 Hz, 3H, α-Me).

**<sup>13</sup>C{<sup>1</sup>H} NMR** (151.9 MHz, CD<sub>2</sub>Cl<sub>2</sub>, 295 K), δ<sub>13C</sub> [ppm] = Due to the low concentration of [<sup>Et</sup>1<sup>-</sup>-CO<sub>2</sub>]<sup>-</sup>, complete characterization by <sup>13</sup>C{<sup>1</sup>H} NMR spectroscopy was not possible. Only the well resolved and reliably assignable signals of [<sup>Et</sup>1<sup>-</sup>-CO<sub>2</sub>]<sup>-</sup> are listed. Some of them were identified by two-dimensional experiments. **184.6** (s, C<sub>q</sub>, C-4), **168.6** (s, C<sub>q</sub>, C-5), **158.6** (s, CH, C-2), **126.5** (s, CH, C-3), **105.0** (s, CH, β-C), **104.5** (s, CH, β-C), **103.5** (s, CH, β-C), **103.5** (s, CH, β-C), **102.4** (s, CH, β-C), **101.4** (s, CH, β-C), **97.3** (s, C<sub>q</sub>, C-1), **11.1** (s, CH<sub>3</sub>, α-Me), **11.0** (s, CH<sub>3</sub>, α-Me), **10.7** (s, CH<sub>3</sub>, α-Me), **10.0** (s, CH<sub>3</sub>, α-Me), **9.7** (s, CH<sub>3</sub>, α-Me), **9.1** (s, CH<sub>3</sub>, α-Me), **8.7** (s, CH<sub>3</sub>, α-Me).

**<sup>31</sup>P{<sup>1</sup>H} NMR** (243.0 MHz, CD<sub>2</sub>Cl<sub>2</sub>, 295 K), δ<sub>31P</sub> [ppm] = **23.2** (s, [PPh<sub>4</sub>]<sup>+</sup>).

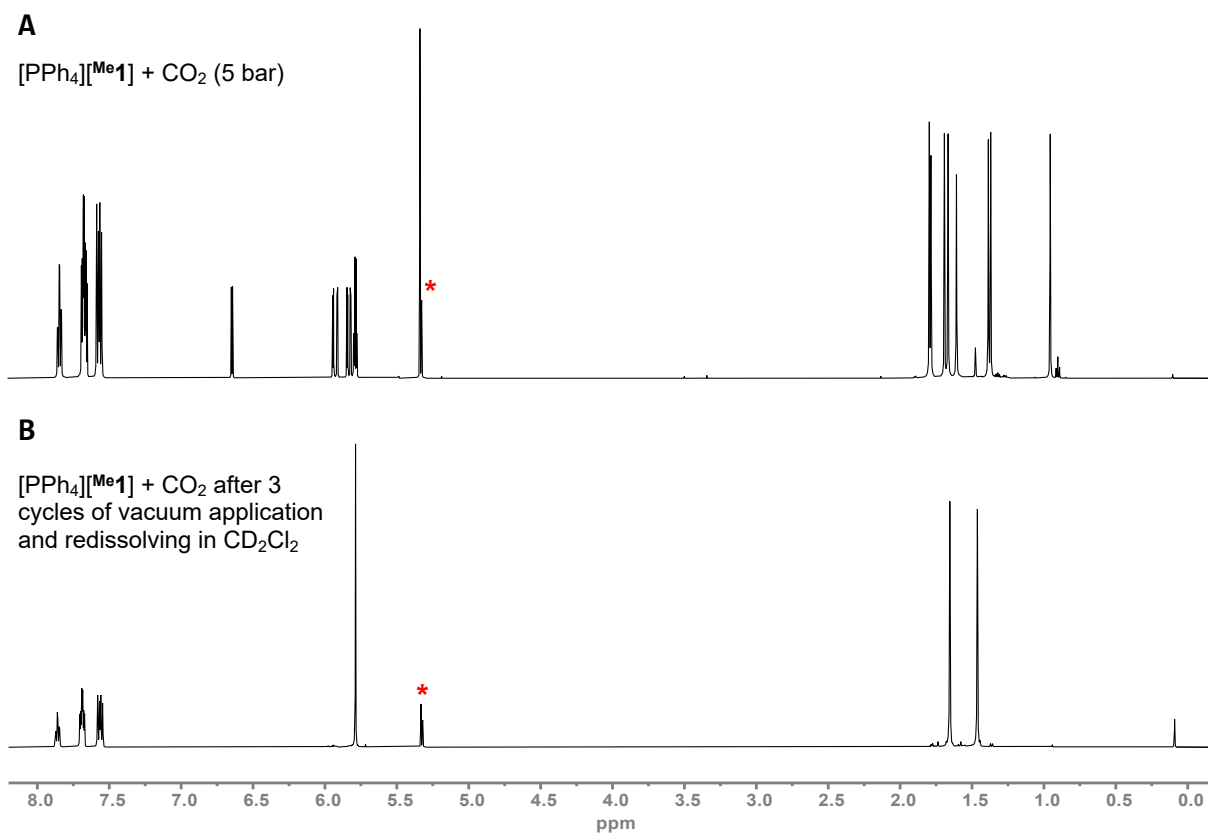

**Figure S1.** <sup>1</sup>H NMR spectra (600.2 MHz, CD<sub>2</sub>Cl<sub>2</sub>, 295 K) of [PPh<sub>4</sub>][Me<sup>e</sup>1] **A** in the presence of CO<sub>2</sub> (5 bar) and **B** after three cycles of vacuum application. The signal of CHDCl<sub>2</sub> and of residual CH<sub>2</sub>Cl<sub>2</sub> is marked with a red asterisk.

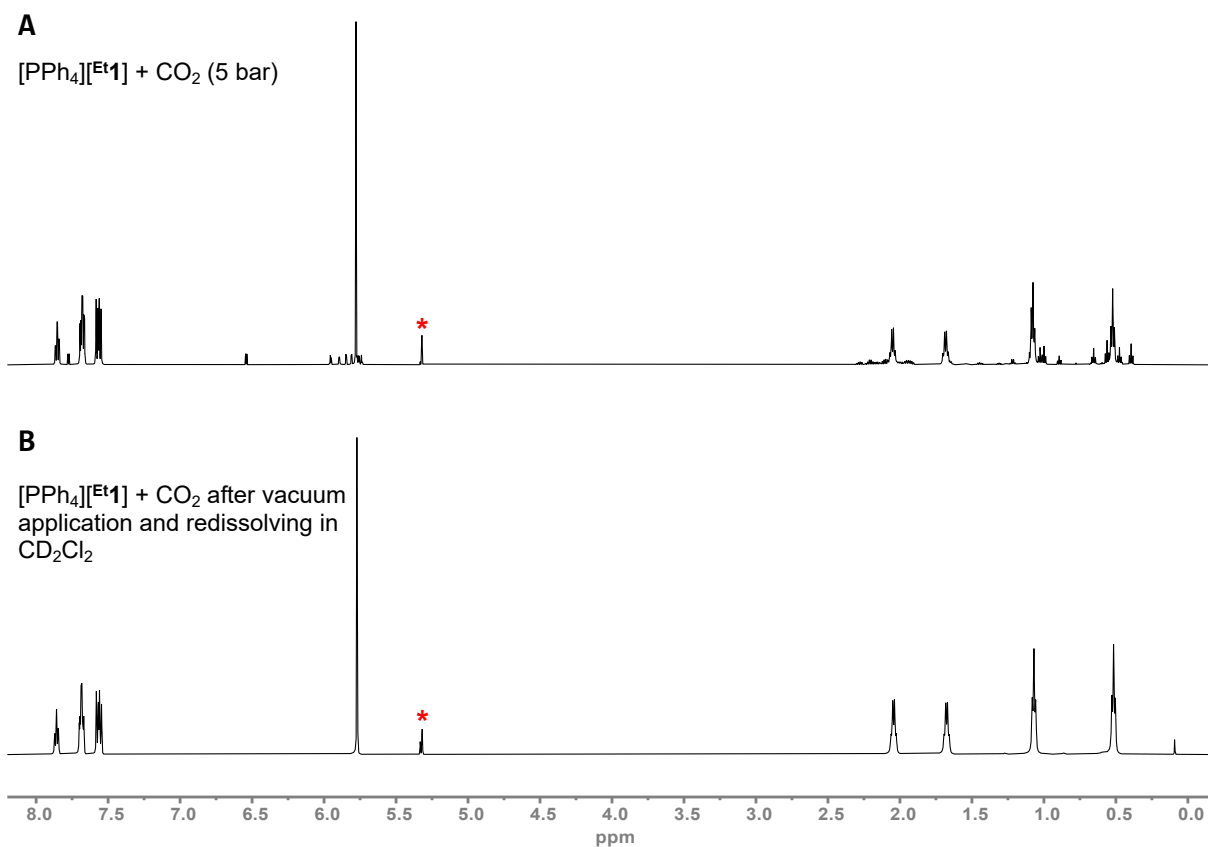

**Figure S2.** <sup>1</sup>H NMR spectra (600.2 MHz, CD<sub>2</sub>Cl<sub>2</sub>, 295 K) of [PPh<sub>4</sub>][Et<sup>1</sup>] **A** in the presence of CO<sub>2</sub> (5 bar) and **B** after one cycles of vacuum application. The signal of CHDCl<sub>2</sub> is marked with a red asterisk.

## S6. Reactivity with HNTf<sub>2</sub> and isopropanol

### Reactivity with isopropanol without HNTf<sub>2</sub> activation

**Procedure.** In a nitrogen-filled glove box, tetraphenylphosphonium *meso*-octamethylcalix[4]pyrrolato gallate and tetraphenylphosphonium *meso*-octaethylcalix[4]pyrrolato gallate (7 mg) were placed in two separate J. Young NMR tubes and were dissolved in CD<sub>2</sub>Cl<sub>2</sub> (each 0.5 mL). To the samples, isopropanol ([PPh<sub>4</sub>]<sup>[Me1]</sup>: 1.0 μL, [PPh<sub>4</sub>]<sup>[Et1]</sup>: 0.7 μL) was added in one portion at room temperature using a piston pipette. No color change occurred in both cases. The samples were closed and were vigorously shaken. The samples were analyzed by <sup>1</sup>H NMR spectroscopy immediately after preparation and after standing 24 h at room temperature (Figure S3 and Figure S4). No reaction occurred.

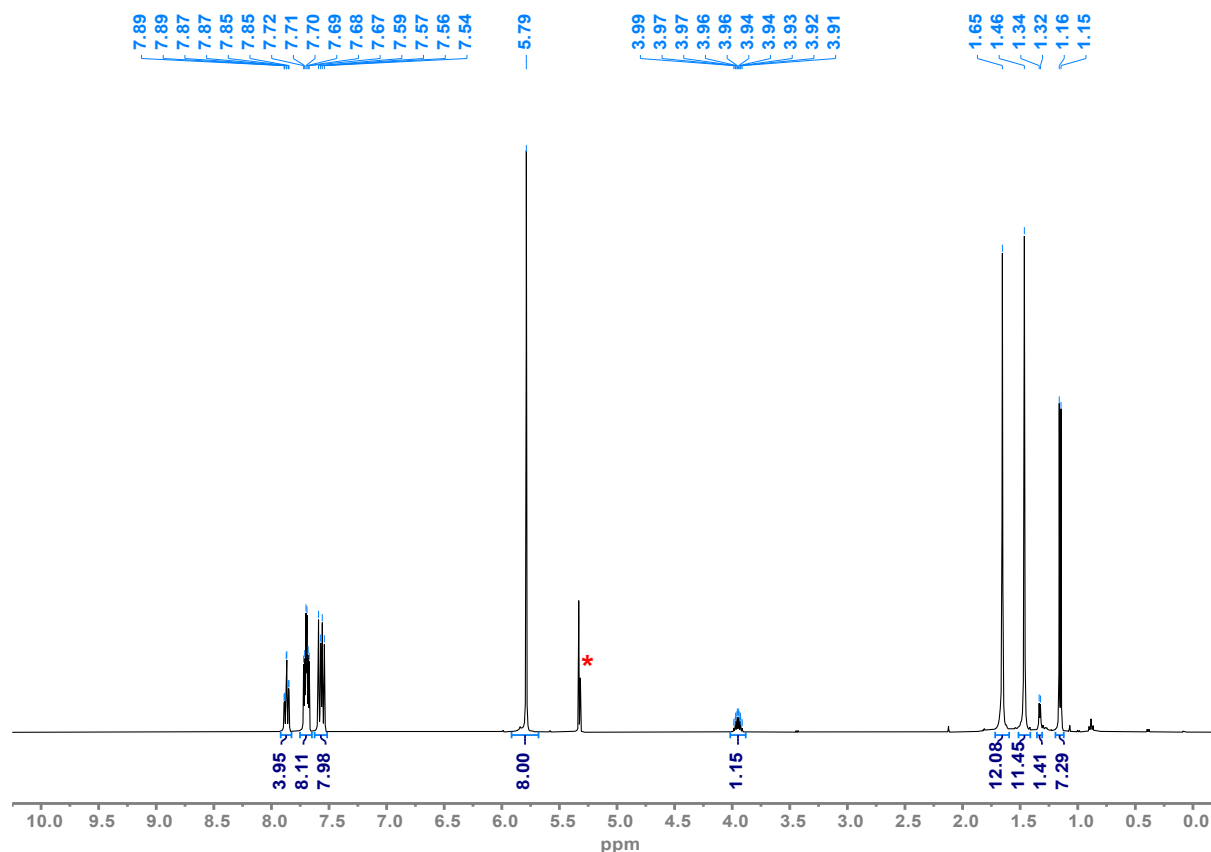

**Figure S3.** <sup>1</sup>H NMR spectrum (399.9 MHz, CD<sub>2</sub>Cl<sub>2</sub>, 295 K) of [PPh<sub>4</sub>]<sup>[Me1]</sup> in the presence of approximately one equivalent of isopropanol. The signal of CHDCl<sub>2</sub> and of residual CH<sub>2</sub>Cl<sub>2</sub> is marked with a red asterisk.

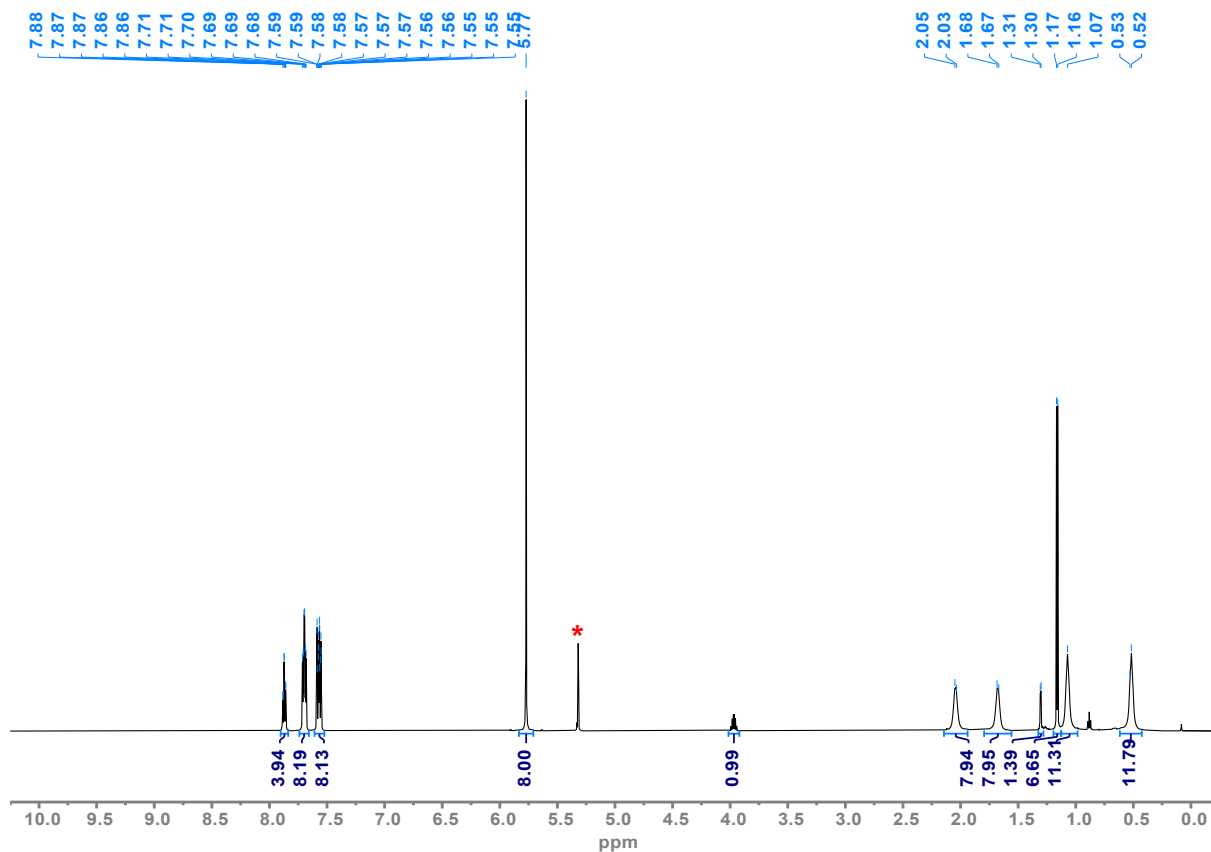

**Figure S4.**  $^1\text{H}$  NMR spectrum (600.2 MHz,  $\text{CD}_2\text{Cl}_2$ , 295 K) of  $[\text{PPh}_4][\text{Et}1]$  in the presence of approximately one equivalent of isopropanol. The signal of  $\text{CH}_2\text{Cl}_2$  and is marked with a red asterisk.

#### Reactivity with $\text{HNTf}_2$

Reaction with  $\text{THF-d}_8$  as solvent

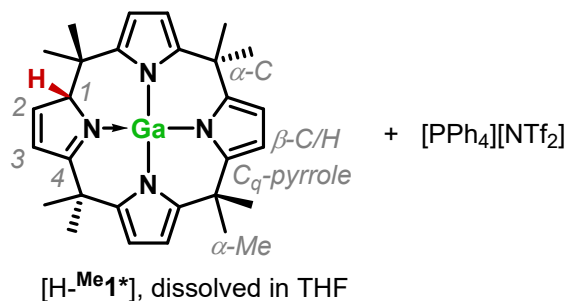

**Procedure.** In a nitrogen-filled glove box, tetraphenylphosphonium *meso*-octamethylcalix[4]pyrrolo gallate (10.0 mg, 10.99  $\mu\text{mol}$  (0.9 eq of residual  $\text{CH}_2\text{Cl}_2$  included), 1.0 eq) and bis(trifluoromethyl)sulfoniide ( $\text{HNTf}_2$ , 3.0 mg, 10.66  $\mu\text{mol}$ , 0.97 eq) were placed in a J. Young NMR tube.  $\text{THF-d}_8$  (0.5 mL) was added, the sample was closed and was vigorously shaken. A yellow solution was obtained which was analyzed by NMR spectroscopy.

**$^1\text{H}$  NMR** (600.2 MHz,  $\text{THF-d}_8$ , 295 K),  $\delta_{\text{H}}$  [ppm] = 7.95-7.90 (m, 4H,  $[\text{PPh}_4]^+$ ), 7.85 (d,  $^3J_{\text{HH}} = 5.4$  Hz, 1H, H-2), 7.80-7.74 (m, 16H,  $[\text{PPh}_4]^+$ ), 7.18 (dd,  $^3J_{\text{HH}} = 5.4$  Hz,  $^4J_{\text{HH}} = 1.3$  Hz, 1H, H-3), 6.08 (d,  $^3J_{\text{HH}} = 3.3$  Hz, 1H,  $\beta$ -H), 5.96 (d,  $^3J_{\text{HH}} = 3.3$  Hz, 1H,  $\beta$ -H), 5.95 (d,  $^3J_{\text{HH}} = 3.2$  Hz, 1H,  $\beta$ -H), 5.92 (d,  $^3J_{\text{HH}} = 3.2$  Hz, 1H,  $\beta$ -H), 5.81 (d,  $^3J_{\text{HH}} = 3.1$  Hz, 1H,  $\beta$ -H), 5.79 (d,  $^3J_{\text{HH}} = 3.1$  Hz, 1H,  $\beta$ -H), 5.02 (s, 1H, H-1), 1.77 (s, 3H,  $\alpha$ -Me), 1.65 (s, 2  $\times$  3H,  $\alpha$ -Me), 1.56 (s, 3H,  $\alpha$ -Me), 1.51 (s, 3H,  $\alpha$ -Me), 1.47 (s, 3H,  $\alpha$ -Me), 1.43 (s, 3H,  $\alpha$ -Me), 0.86 (s, 3H,  $\alpha$ -Me).

**$^{13}\text{C}\{^1\text{H}\}$  NMR** (151.9 MHz,  $\text{THF-d}_8$ , 295 K),  $\delta_{13\text{C}}$  [ppm] = 190.3 (s,  $\text{C}_q$ , C-4), 156.6 (s, CH, C-2), 150.0 (s,  $\text{C}_q$ ,  $\text{C}_q$ -pyrrolo), 149.5 (s,  $\text{C}_q$ ,  $\text{C}_q$ -pyrrolo), 147.3 (s,  $\text{C}_q$ ,  $\text{C}_q$ -pyrrolo), 145.6 (s,  $\text{C}_q$ ,  $\text{C}_q$ -pyrrolo), 145.5 (s,  $\text{C}_q$ ,  $\text{C}_q$ -pyrrolo), 141.3 (s,  $\text{C}_q$ ,  $\text{C}_q$ -pyrrolo), 136.1 (d, CH,  $^4J_{\text{PC}} = 3.1$  Hz,  $[\text{PPh}_4]^+$ ), 135.5 (d, CH,  $^2J_{\text{PC}} = 10.4$  Hz,  $[\text{PPh}_4]^+$ ), 131.2 (d, CH,  $^3J_{\text{PC}} = 12.9$  Hz,  $[\text{PPh}_4]^+$ ), 129.5 (s, CH, C-3), 121.0 (q,  $\text{CF}_3$ ,  $^1J_{\text{FC}} = 322.4$  Hz,  $[\text{NTf}_2]^-$ , the outer two peaks of the quartet were only barely visible), 118.9 (d,  $\text{C}_q$ ,  $^1J_{\text{PC}} = 89.5$  Hz,  $[\text{PPh}_4]^+$ ), 106.4 (s, CH,

$\beta$ -C), **103.8** (s, CH,  $\beta$ -C), **103.8** (s, CH,  $\beta$ -C), **103.6** (s, CH,  $\beta$ -C), **102.1** (s, 2  $\times$  CH,  $\beta$ -C), **87.6** (s, CH, C-1), **39.8** (s, C<sub>q</sub>,  $\alpha$ -C), **39.3** (s, C<sub>q</sub>,  $\alpha$ -C), **36.5** (s, C<sub>q</sub>,  $\alpha$ -C), **36.4** (s, C<sub>q</sub>,  $\alpha$ -C), **36.2** (s, CH<sub>3</sub>,  $\alpha$ -Me), **35.0** (s, CH<sub>3</sub>,  $\alpha$ -Me), **33.91** (s, CH<sub>3</sub>,  $\alpha$ -Me), **33.87** (s, CH<sub>3</sub>,  $\alpha$ -Me), **31.9** (s, CH<sub>3</sub>,  $\alpha$ -Me), **29.5** (s, CH<sub>3</sub>,  $\alpha$ -Me), **28.3** (s, CH<sub>3</sub>,  $\alpha$ -Me), **24.8** (s, CH<sub>3</sub>,  $\alpha$ -Me).

**<sup>19</sup>F NMR** (188.1 MHz, THF-d<sub>8</sub>, 295 K),  $\delta_{19F}$  [ppm] = **-79.9** (s, [NTf<sub>2</sub>]<sup>-</sup>).

**<sup>31</sup>P{<sup>1</sup>H} NMR** (243.0 MHz, THF-d<sub>8</sub>, 295 K),  $\delta_{31P}$  [ppm] = **21.1** (s, [PPh<sub>4</sub>]<sup>+</sup>).

The <sup>1</sup>H,<sup>1</sup>H COSY NMR spectrum showed characteristic cross peaks between the signals at 5.02 (transferred proton) and 7.18 ppm (H-3) and between the signals at 7.18 (H-3) and 7.85 ppm (H-2) (see Figure S25).

Reaction with CD<sub>2</sub>Cl<sub>2</sub> / diethyl ether (2:1 %vol) as solvent

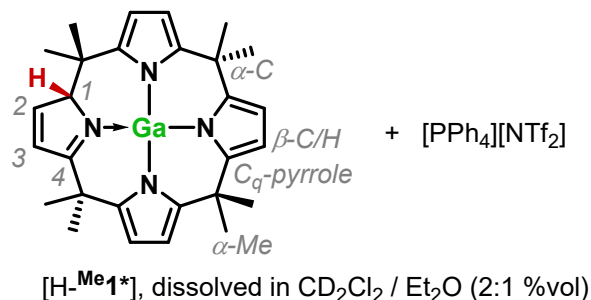

**Procedure.** In a nitrogen-filled glove box, tetraphenylphosphonium *meso*-octamethylcalix[4]pyrrolato gallate (10.0 mg, 10.99  $\mu$ mol (0.9 eq of residual CH<sub>2</sub>Cl<sub>2</sub> included), 1.0 eq) were suspended in a mixture of CD<sub>2</sub>Cl<sub>2</sub> and diethyl ether (2:1 %vol, 0.5 mL) in a 1 mL vial. bis(Trifluoromethyl)sulfonimide (HNTf<sub>2</sub>, 2.8 mg, 10.66  $\mu$ mol, 0.9 eq) was dissolved in the same solvent mixture (0.3 mL). The HNTf<sub>2</sub> solution was dropwise added to the gallate suspension over the course of 5 min at room temperature while shaking the latter. The reaction mixture turned yellow. It was filtered into a J. Young NMR tube and was analyzed by NMR spectroscopy.

**<sup>1</sup>H NMR** (600.2 MHz, CD<sub>2</sub>Cl<sub>2</sub> / Et<sub>2</sub>O (2:1 %vol), 295 K), spectrum was calibrated with the signal of CHDCl<sub>2</sub> to 5.32 ppm,  $\delta_{1H}$  [ppm] = **7.92-7.86** (m, 4H, [PPh<sub>4</sub>]<sup>+</sup>), **7.77-7.71** (m, 8H, [PPh<sub>4</sub>]<sup>+</sup>), **7.73** (1H, H-2, identified by <sup>1</sup>H,<sup>1</sup>H COSY NMR spectroscopy, expected multiplicity is d), **7.66-7.59** (m, 8H, [PPh<sub>4</sub>]<sup>+</sup>), **7.05** (dd, <sup>3</sup>J<sub>HH</sub> = 5.4 Hz, <sup>4</sup>J<sub>HH</sub> = 1.3 Hz, 1H, H-3), **6.14** (d, <sup>3</sup>J<sub>HH</sub> = 3.3 Hz, 1H,  $\beta$ -H), **6.05** (d, <sup>3</sup>J<sub>HH</sub> = 3.3 Hz, 1H,  $\beta$ -H), **6.03** (d, <sup>3</sup>J<sub>HH</sub> = 3.3 Hz, 1H,  $\beta$ -H), **6.00** (d, <sup>3</sup>J<sub>HH</sub> = 3.2 Hz, 1H,  $\beta$ -H), **5.90** (s, 2  $\times$  1H,  $\beta$ -H), **4.91** (s, 1H, H-1), **1.82** (s, 3H,  $\alpha$ -Me), **1.63** (s, 3H,  $\alpha$ -Me), **1.574** (s, 3H,  $\alpha$ -Me), **1.568** (s, 3H,  $\alpha$ -Me), **1.52** (s, 3H,  $\alpha$ -Me), **1.46** (s, 3H,  $\alpha$ -Me), **1.44** (s, 3H,  $\alpha$ -Me), **0.81** (s, 3H,  $\alpha$ -Me).

**<sup>13</sup>C{<sup>1</sup>H} NMR** (151.9 MHz, CD<sub>2</sub>Cl<sub>2</sub> / Et<sub>2</sub>O (2:1 %vol), 295 K), spectrum was calibrated with the signal of CD<sub>2</sub>Cl<sub>2</sub> to 53.84 ppm,  $\delta_{13C}$  [ppm] = **190.0** (s, C<sub>q</sub>, C-4), **156.6** (s, CH, C-2), **151.1** (s, C<sub>q</sub>, C<sub>q</sub>-pyrrole), **150.7** (s, C<sub>q</sub>, C<sub>q</sub>-pyrrole), **148.3** (s, C<sub>q</sub>, C<sub>q</sub>-pyrrole), **146.0** (s, C<sub>q</sub>, C<sub>q</sub>-pyrrole), **145.3** (s, C<sub>q</sub>, C<sub>q</sub>-pyrrole), **141.4** (s, C<sub>q</sub>, C<sub>q</sub>-pyrrole), **136.4** (d, CH, <sup>4</sup>J<sub>PC</sub> = 3.1 Hz, [PPh<sub>4</sub>]<sup>+</sup>), **135.1** (d, CH, <sup>2</sup>J<sub>PC</sub> = 10.3 Hz, [PPh<sub>4</sub>]<sup>+</sup>), **131.3** (d, CH, <sup>3</sup>J<sub>PC</sub> = 12.9 Hz, [PPh<sub>4</sub>]<sup>+</sup>), **129.8** (s, CH, C-3), **120.6** (q, CF<sub>3</sub>, <sup>1</sup>J<sub>FC</sub> = 321.2 Hz, [NTf<sub>2</sub>]<sup>-</sup>, the outer two peaks of the quartet were only barely visible), **118.3** (d, C<sub>q</sub>, <sup>1</sup>J<sub>PC</sub> = 89.7 Hz, [PPh<sub>4</sub>]<sup>+</sup>), **106.9** (s, CH,  $\beta$ -C), **104.7** (s, CH,  $\beta$ -C), **104.4** (s, CH,  $\beta$ -C), **104.1** (s, CH,  $\beta$ -C), **102.8** (s, CH,  $\beta$ -C), **102.4** (s, CH,  $\beta$ -C), **87.4** (s, CH, C-1), **42.7** (s, CH,  $\alpha$ -Me), **40.5** (s, C<sub>q</sub>,  $\alpha$ -C), **39.1** (s, C<sub>q</sub>,  $\alpha$ -C), **37.5** (s, CH,  $\alpha$ -Me), **36.43** (s, C<sub>q</sub>,  $\alpha$ -C), **36.38** (s, C<sub>q</sub>,  $\alpha$ -C), **35.5** (s, CH,  $\alpha$ -Me), **32.2** (s, CH,  $\alpha$ -Me), **31.7** (s, CH,  $\alpha$ -Me), **26.7** (s, CH,  $\alpha$ -Me), **25.3** (s, CH,  $\alpha$ -Me), **25.2** (s, CH,  $\alpha$ -Me).

**<sup>19</sup>F NMR** (376.3 MHz, CD<sub>2</sub>Cl<sub>2</sub> / Et<sub>2</sub>O (2:1 %vol), 295 K),  $\delta_{19F}$  [ppm] = **-79.8** (s, [NTf<sub>2</sub>]<sup>-</sup>).

**<sup>31</sup>P{<sup>1</sup>H} NMR** (243.0 MHz, CD<sub>2</sub>Cl<sub>2</sub> / Et<sub>2</sub>O (2:1 %vol), 295 K),  $\delta_{31P}$  [ppm] = **23.2** (s, [PPh<sub>4</sub>]<sup>+</sup>).

The identical pattern in the <sup>1</sup>H,<sup>1</sup>H COSY NMR spectrum as for the reaction in THF-d<sub>8</sub> was found.

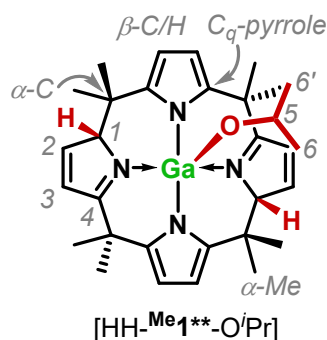

**Procedure.** In a nitrogen-filled glove box, tetraphenylphosphonium *meso*-octamethylcalix[4]pyrrolato gallate (10.0 mg, 10.99  $\mu\text{mol}$  (0.9 eq of residual  $\text{CH}_2\text{Cl}_2$  included), 1.0 eq) was suspended in a mixture of  $\text{CH}_2\text{Cl}_2$  and diethyl ether (2:1 %vol, 2 mL) in a 10 mL snap cap vial and was vigorously stirred at room temperature. bis(Trifluoromethyl)sulfonimide (HNTf<sub>2</sub>, 3.0 mg, 10.66  $\mu\text{mol}$ , 0.97 eq) was dissolved in the same solvent mixture (0.5 mL). The HNTf<sub>2</sub> solution was added dropwise to the gallate suspension over the course of 5 min at room temperature. The reaction mixture turned yellow. Isopropanol (0.9  $\mu\text{L}$ , 11.79  $\mu\text{mol}$ , 1.07 eq) was added in one portion at room temperature using a piston pipette. It was continued to stir for 1 min. All volatiles were removed under reduced pressure. From the obtained solid, it was extracted with a *n*-pentane/diethyl ether mixture (4:1 %vol, 2.5 mL in total, used over three extraction cycles). After removing the solvent from the extract under reduced pressure and drying *in vacuo*, a pale-yellow solid was isolated, which was characterized to [HH-Me1\*\*-O]Pr by NMR spectroscopy (4.4 mg, 7.92  $\mu\text{mol}$ , 72% yield).

It was noted by <sup>1</sup>H NMR spectroscopy (see Figure S28) that a small quantity (approximately 8% relative to the shown compound) of another molecule was formed. Based on the acquired NMR data, this is assigned to a constitutional isomer in which the two dearomatization-inducing protons are convertible into each other by means of a mirror plane. One proton is located at the 2- the other at the 5-position of the respective dearomatized pyrrole ring.

**<sup>1</sup>H NMR** (600.2 MHz,  $\text{CD}_2\text{Cl}_2$ , 295 K),  $\delta_{\text{H}}$  [ppm] = **7.61** (dd, <sup>3</sup>*J*<sub>HH</sub> = 5.4, 0.7 Hz, 2H, H-2), **7.00** (dd, <sup>3</sup>*J*<sub>HH</sub> = 5.4, <sup>4</sup>*J*<sub>HH</sub> = 1.4 Hz, 2H, H-3), **6.09** (d, <sup>3</sup>*J*<sub>HH</sub> = 3.3 Hz, 2H,  $\beta$ -H), **6.00** (d, <sup>3</sup>*J*<sub>HH</sub> = 3.3 Hz, 2H,  $\beta$ -H), **4.87** (br s, 2H, H-1), **3.52** (sept, <sup>3</sup>*J*<sub>HH</sub> = 6.0 Hz, 1H, H-5), **1.88** (s, 6H,  $\alpha$ -Me), **1.84** (s, 6H,  $\alpha$ -Me), **1.57** (s, 6H,  $\alpha$ -Me), **0.89** (d, <sup>3</sup>*J*<sub>HH</sub> = 6.0 Hz, 3H, H-6), **0.69** (d, <sup>3</sup>*J*<sub>HH</sub> = 6.0 Hz, 3H, H-6'), **0.44** (s, 6H,  $\alpha$ -Me).

**<sup>13</sup>C{<sup>1</sup>H} NMR** (151.9 MHz,  $\text{CD}_2\text{Cl}_2$ , 295 K),  $\delta_{\text{13C}}$  [ppm] = **188.4** (s, C<sub>q</sub>, C-4), **155.3** (s, CH, C-2), **147.7** (s, C<sub>q</sub>, C<sub>q</sub>-pyrrole), **142.7** (s, C<sub>q</sub>, C<sub>q</sub>-pyrrole), **129.1** (s, CH, C-3), **104.7** (s, CH,  $\beta$ -C), **102.9** (s, CH,  $\beta$ -C), **87.1** (s, CH, C-1), **64.4** (s, CH, C-5), **39.4** (s, C<sub>q</sub>,  $\alpha$ -C), **38.8** (s, C<sub>q</sub>,  $\alpha$ -C), **32.4** (s, CH<sub>3</sub>,  $\alpha$ -Me), **28.7** (s, CH<sub>3</sub>,  $\alpha$ -Me), **28.4** (s, CH<sub>3</sub>,  $\alpha$ -Me), **27.2** (s, CH<sub>3</sub>, C-6), **26.9** (s, CH<sub>3</sub>, C-6'), **23.0** (s, CH<sub>3</sub>,  $\alpha$ -Me).

The <sup>1</sup>H,<sup>1</sup>H COSY NMR spectrum showed characteristic cross peaks between the signals at 4.87 (protons at the 2-positions) and 7.00 ppm (H-3) and between the signals at 7.00 (H-3) and 7.61 ppm (H-2) (see Figure S30). Moreover, the <sup>1</sup>H,<sup>1</sup>H NOESY NMR spectrum (see Figure S31) revealed spatial proximity of the isopropyl group and the ligand framework (both with the methyl groups and with the signal of the protons at the 2-positions). This further confirms the attachment of the [iPrO]<sup>-</sup> group to the gallium center.



## S7. X-ray crystallography

Crystals of the both gallates as their tetraphenylphosphonium salts ( $[\text{PPh}_4][\text{Me}^1]$  and  $[\text{PPh}_4][\text{Et}^1]$ ) were grown by gas phase diffusion of *n*-pentane into dichloromethane solutions (approximately 30 mg mL<sup>-1</sup>) at -40 °C. The THF adduct of  $[\text{Me}^1]^-$  as its tetraphenylphosphonium salt ( $[\text{PPh}_4][\text{Me}^1\text{-thf}]$ ) crystallized at room temperature when the synthesis of  $[\text{PPh}_4][\text{Me}^1]$  was attempted on NMR sample scale (J. Young NMR tube) in THF-*d*<sub>8</sub>. However, not the sodium but rather the lithium salt of the deprotonated ligand (deprotonation carried out with *n*-butyllithium in THF)<sup>11</sup> was used in this reaction. Crystals formed overnight after mixing the deprotonated ligand (15.0 mg) and  $[\text{PPh}_4][\text{GaCl}_4]$  (10.4 mg) in THF-*d*<sub>8</sub> (0.5 mL) at room temperature.

For SCXRD measurements, crystals were immersed in perfluorinated polyether oil. A suitable crystal was picked and was fixed on top of a cryo loop. A Bruker APEX-III CCD diffractometer with a low-temperature unit using Mo-K $\alpha$  radiation, chromated by mirror optics, was used for  $\varphi$  and  $\omega$  scans. Data acquisition was done at 100.0 K. A strategy for data collection was calculated with Bruker's APEX3 software.<sup>12-13</sup> This program was also used for processing of collected data. Data reduction, scaling, and absorption corrections were done with SAINT.<sup>14</sup> SADABS-2016/2 was used for multi-scan absorption correction.<sup>15</sup> Structures were solved with direct methods as implemented in the ShelXT 2018<sup>16-17</sup> structure solution program. Structure refinement was carried out by full matrix least squares minimization on  $F^2$  using the 2018/3 version of ShelXL<sup>18-21</sup>. All non-hydrogen atoms were refined anisotropically. Hydrogen atom positions were calculated geometrically and refined using a riding model. Handling of the structural data during refinement was performed with the ShelXle (Rev: 1246)<sup>22</sup> or Olex2 v1.3<sup>23</sup> graphical interface. Data finalization was done with FinalCif v104 (D. Kratzert, *FinalCif*, V104, <https://dkratzert.de/finalcif.html>).

For data visualization, Mercury 4.1.3 was used.<sup>24-26</sup> The thermal displacement ellipsoids are shown at a probability level of 50% (Figure S5, Figure S6, Figure S7).

### $[\text{PPh}_4][\text{Me}^1]$

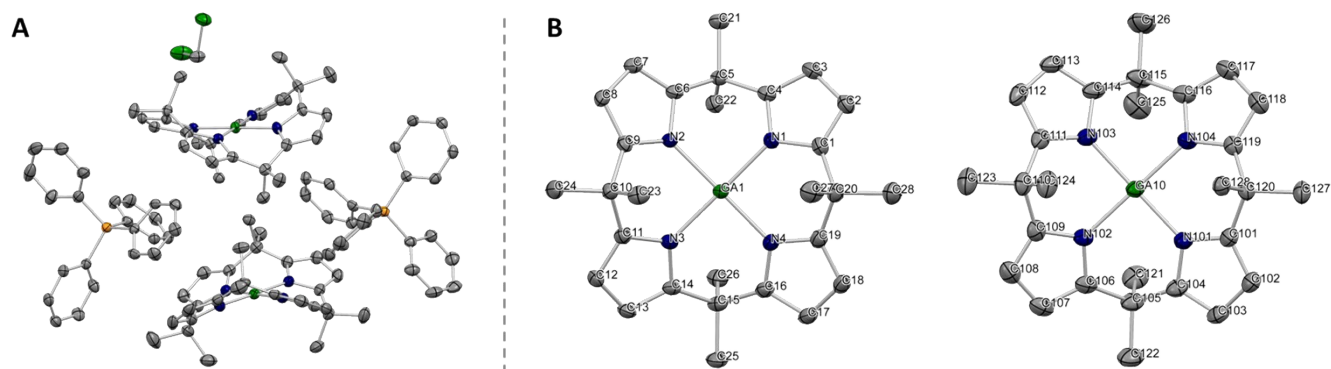

**Figure S5.** **A)** Asymmetric unit of the crystal lattice which was found for  $[\text{PPh}_4][\text{Me}^1] \cdot 0.5 \text{ CH}_2\text{Cl}_2$  (monoclinic,  $P2_1/c$ ), and **B)** molecular structures of the anions  $[\text{Me}^1]^-$ , with atom labels. All non-hydrogen thermal displacement ellipsoids are shown at a probability level of 50%.

**Table S1.** Crystal data and structure refinement for  $[\text{PPh}_4][\text{Me}^1] \cdot 0.5 \text{ CH}_2\text{Cl}_2$  (mo\_lmsnr006\_ii\_02a).

|                                           |                                                       |
|-------------------------------------------|-------------------------------------------------------|
| CCDC number                               | 2175982                                               |
| Empirical formula                         | $\text{C}_{52.50}\text{H}_{53}\text{ClGaN}_4\text{P}$ |
| Formula weight                            | 876.13                                                |
| Temperature [K]                           | 100.0                                                 |
| Crystal system                            | monoclinic                                            |
| Space group (number)                      | $P2_1/c$ (14)                                         |
| <i>a</i> [Å]                              | 25.4110(18)                                           |
| <i>b</i> [Å]                              | 16.6359(13)                                           |
| <i>c</i> [Å]                              | 23.7139(18)                                           |
| $\alpha$ [°]                              | 90                                                    |
| $\beta$ [°]                               | 107.797(3)                                            |
| $\gamma$ [°]                              | 90                                                    |
| Volume [Å <sup>3</sup> ]                  | 9545.0(12)                                            |
| <i>Z</i>                                  | 8                                                     |
| $\rho_{\text{calc}}$ [gcm <sup>-3</sup> ] | 1.219                                                 |
| $\mu$ [mm <sup>-1</sup> ]                 | 0.704                                                 |
| <i>F</i> (000)                            | 3672                                                  |
| Crystal size [mm <sup>3</sup> ]           | 0.144×0.113×0.086                                     |
| Crystal colour                            | colourless                                            |
| Crystal shape                             | block                                                 |

|                                            |                                                                            |
|--------------------------------------------|----------------------------------------------------------------------------|
| Radiation                                  | MoK $\alpha$ ( $\lambda=0.71073$ Å)                                        |
| 2 $\Theta$ range [°]                       | 4.11 to 54.00 (0.78 Å)                                                     |
| Index ranges                               | -32 $\leq$ h $\leq$ 32<br>-20 $\leq$ k $\leq$ 21<br>-30 $\leq$ l $\leq$ 30 |
| Reflections collected                      | 141733                                                                     |
| Independent reflections                    | 20825<br>$R_{\text{int}} = 0.0912$<br>$R_{\text{sigma}} = 0.0553$          |
| Completeness to<br>$\Theta = 25.242^\circ$ | 99.9 %                                                                     |
| Data / Restraints /<br>Parameters          | 20825/0/1088                                                               |
| Goodness-of-fit on $F^2$                   | 1.027                                                                      |
| Final $R$ indexes<br>[ $\geq 2\sigma(I)$ ] | $R_1 = 0.0463$<br>$wR_2 = 0.1083$                                          |
| Final $R$ indexes<br>[all data]            | $R_1 = 0.0735$<br>$wR_2 = 0.1219$                                          |
| Largest peak/hole [eÅ $^{-3}$ ]            | 1.47/-0.81                                                                 |

**Table S2.** Solid state bond lengths found for [PPh $_4$ ]<sup>[Me $^+$ 1]</sup> • 0.5 CH $_2$ Cl $_2$  (mo\_lmsnr006\_ii\_02a).

| Atoms     | Length [Å] | Atoms     | Length [Å] |
|-----------|------------|-----------|------------|
| Ga1 N3    | 1.938(2)   | C119 C118 | 1.371(4)   |
| Ga1 N2    | 1.946(2)   | C302 C303 | 1.388(4)   |
| Ga1 N1    | 1.935(2)   | C302 C301 | 1.385(4)   |
| Ga1 N4    | 1.929(2)   | C22 C5    | 1.542(4)   |
| Ga10 N101 | 1.928(2)   | C307 C312 | 1.386(4)   |
| Ga10 N103 | 1.938(2)   | C307 C308 | 1.399(4)   |
| Ga10 N104 | 1.951(2)   | C7 C6     | 1.370(4)   |
| Ga10 N102 | 1.935(2)   | C3 C2     | 1.432(4)   |
| P301 C313 | 1.790(3)   | C6 C5     | 1.515(4)   |
| P301 C319 | 1.798(3)   | C21 C5    | 1.532(3)   |
| P301 C307 | 1.807(3)   | C14 C13   | 1.369(4)   |
| P301 C301 | 1.791(3)   | C14 C15   | 1.510(4)   |
| P201 C213 | 1.791(3)   | C206 C201 | 1.389(4)   |
| P201 C219 | 1.797(3)   | C206 C205 | 1.383(4)   |
| P201 C201 | 1.792(3)   | C101 C102 | 1.371(4)   |
| P201 C207 | 1.796(3)   | C111 C110 | 1.513(4)   |
| Cl40 C401 | 1.764(3)   | C111 C112 | 1.369(4)   |
| C11 C401  | 1.748(3)   | C17 C18   | 1.409(4)   |
| N3 C11    | 1.384(3)   | C17 C16   | 1.376(4)   |
| N3 C14    | 1.388(3)   | C216 C217 | 1.378(4)   |
| N2 C9     | 1.388(3)   | C18 C19   | 1.374(4)   |
| N2 C6     | 1.384(3)   | C201 C202 | 1.391(4)   |
| N1 C4     | 1.392(3)   | C303 C304 | 1.383(4)   |
| N1 C1     | 1.384(3)   | C205 C204 | 1.381(4)   |
| N101 C101 | 1.380(4)   | C321 C322 | 1.385(4)   |
| N101 C104 | 1.382(4)   | C301 C306 | 1.399(4)   |
| N103 C111 | 1.389(4)   | C19 C20   | 1.500(4)   |
| N103 C114 | 1.388(4)   | C204 C203 | 1.382(4)   |
| N104 C119 | 1.387(4)   | C323 C322 | 1.382(4)   |
| N104 C116 | 1.382(4)   | C323 C324 | 1.385(4)   |
| N4 C19    | 1.396(3)   | C109 C110 | 1.510(4)   |
| N4 C16    | 1.377(3)   | C109 C108 | 1.366(4)   |
| N102 C109 | 1.386(4)   | C110 C124 | 1.552(4)   |
| N102 C106 | 1.390(4)   | C110 C123 | 1.535(4)   |
| C313 C314 | 1.400(4)   | C15 C16   | 1.513(4)   |
| C313 C318 | 1.399(4)   | C15 C25   | 1.527(4)   |
| C11 C10   | 1.500(4)   | C315 C316 | 1.379(4)   |
| C11 C12   | 1.377(4)   | C106 C107 | 1.371(4)   |
| C9 C10    | 1.511(4)   | C106 C105 | 1.516(4)   |
| C9 C8     | 1.377(4)   | C104 C105 | 1.509(4)   |
| C218 C213 | 1.398(4)   | C104 C103 | 1.364(4)   |
| C218 C217 | 1.394(4)   | C118 C117 | 1.421(4)   |

|             |      |          |      |      |          |
|-------------|------|----------|------|------|----------|
| <b>C319</b> | C320 | 1.399(4) | C114 | C113 | 1.365(4) |
| <b>C319</b> | C324 | 1.390(4) | C114 | C115 | 1.510(5) |
| <b>C224</b> | C219 | 1.389(4) | C116 | C117 | 1.377(4) |
| <b>C224</b> | C223 | 1.386(4) | C116 | C115 | 1.514(4) |
| <b>C10</b>  | C23  | 1.551(4) | C312 | C311 | 1.391(4) |
| <b>C10</b>  | C24  | 1.529(4) | C304 | C305 | 1.375(4) |
| <b>C220</b> | C219 | 1.392(4) | C202 | C203 | 1.375(4) |
| <b>C220</b> | C221 | 1.385(4) | C102 | C103 | 1.422(4) |
| <b>C213</b> | C214 | 1.394(4) | C112 | C113 | 1.416(5) |
| <b>C314</b> | C315 | 1.380(4) | C208 | C207 | 1.397(4) |
| <b>C215</b> | C214 | 1.384(4) | C208 | C209 | 1.384(4) |
| <b>C215</b> | C216 | 1.388(4) | C317 | C316 | 1.378(4) |
| <b>C4</b>   | C3   | 1.368(4) | C20  | C28  | 1.536(4) |
| <b>C4</b>   | C5   | 1.510(4) | C20  | C27  | 1.552(4) |
| <b>C320</b> | C321 | 1.388(4) | C107 | C108 | 1.423(5) |
| <b>C8</b>   | C7   | 1.419(4) | C207 | C212 | 1.390(4) |
| <b>C1</b>   | C2   | 1.372(4) | C105 | C122 | 1.527(4) |
| <b>C1</b>   | C20  | 1.511(4) | C105 | C121 | 1.557(4) |
| <b>C221</b> | C222 | 1.381(4) | C308 | C309 | 1.395(5) |
| <b>C26</b>  | C15  | 1.545(4) | C212 | C211 | 1.385(5) |
| <b>C12</b>  | C13  | 1.414(4) | C306 | C305 | 1.387(4) |
| <b>C223</b> | C222 | 1.382(4) | C309 | C310 | 1.389(5) |
| <b>C120</b> | C119 | 1.519(4) | C209 | C210 | 1.383(5) |
| <b>C120</b> | C101 | 1.510(4) | C210 | C211 | 1.373(5) |
| <b>C120</b> | C128 | 1.548(4) | C311 | C310 | 1.364(5) |
| <b>C120</b> | C127 | 1.535(4) | C115 | C126 | 1.537(4) |
| <b>C318</b> | C317 | 1.386(4) | C115 | C125 | 1.551(5) |

**Table S3.** Solid state bond angles found for [PPh<sub>4</sub>][Me<sup>+</sup>] • 0.5 CH<sub>2</sub>Cl<sub>2</sub> (mo\_lmsnr006\_ii\_02a).

| Atoms       |      |      | Angle      | Atoms |      |      | Angle    |
|-------------|------|------|------------|-------|------|------|----------|
| <b>N3</b>   | Ga1  | N2   | 89.36(9)   | N101  | C101 | C120 | 120.7(2) |
| <b>N1</b>   | Ga1  | N3   | 178.59(10) | C102  | C101 | N101 | 108.9(3) |
| <b>N1</b>   | Ga1  | N2   | 89.93(9)   | C102  | C101 | C120 | 130.2(3) |
| <b>N4</b>   | Ga1  | N3   | 90.33(9)   | N103  | C111 | C110 | 121.0(3) |
| <b>N4</b>   | Ga1  | N2   | 178.42(10) | C112  | C111 | N103 | 108.5(3) |
| <b>N4</b>   | Ga1  | N1   | 90.41(9)   | C112  | C111 | C110 | 130.2(3) |
| <b>N101</b> | Ga10 | N103 | 178.92(11) | C14   | C13  | C12  | 107.8(2) |
| <b>N101</b> | Ga10 | N104 | 89.81(10)  | C16   | C17  | C18  | 107.5(2) |
| <b>N101</b> | Ga10 | N102 | 90.14(10)  | C217  | C216 | C215 | 121.1(3) |
| <b>N103</b> | Ga10 | N104 | 89.70(10)  | C19   | C18  | C17  | 107.7(3) |
| <b>N102</b> | Ga10 | N103 | 90.37(10)  | C206  | C201 | P201 | 121.3(2) |
| <b>N102</b> | Ga10 | N104 | 178.95(10) | C206  | C201 | C202 | 120.5(3) |
| <b>C313</b> | P301 | C319 | 109.86(13) | C202  | C201 | P201 | 118.1(2) |
| <b>C313</b> | P301 | C307 | 110.55(13) | C304  | C303 | C302 | 120.1(3) |
| <b>C313</b> | P301 | C301 | 109.23(13) | C4    | C5   | C22  | 108.9(2) |
| <b>C319</b> | P301 | C307 | 108.21(13) | C4    | C5   | C6   | 111.3(2) |
| <b>C301</b> | P301 | C319 | 108.18(13) | C4    | C5   | C21  | 110.3(2) |
| <b>C301</b> | P301 | C307 | 110.77(13) | C6    | C5   | C22  | 108.5(2) |
| <b>C213</b> | P201 | C219 | 111.50(13) | C6    | C5   | C21  | 109.5(2) |
| <b>C213</b> | P201 | C201 | 106.86(13) | C21   | C5   | C22  | 108.2(2) |
| <b>C213</b> | P201 | C207 | 112.30(13) | C1    | C2   | C3   | 107.2(2) |
| <b>C201</b> | P201 | C219 | 110.26(13) | C216  | C217 | C218 | 119.9(3) |
| <b>C201</b> | P201 | C207 | 108.94(13) | C204  | C205 | C206 | 120.2(3) |
| <b>C207</b> | P201 | C219 | 106.97(13) | C322  | C321 | C320 | 120.2(3) |
| <b>C11</b>  | N3   | Ga1  | 125.90(17) | C302  | C301 | P301 | 118.9(2) |
| <b>C11</b>  | N3   | C14  | 108.2(2)   | C302  | C301 | C306 | 120.4(3) |
| <b>C14</b>  | N3   | Ga1  | 125.64(18) | C306  | C301 | P301 | 120.4(2) |
| <b>C9</b>   | N2   | Ga1  | 125.23(17) | N4    | C19  | C20  | 120.5(2) |
| <b>C6</b>   | N2   | Ga1  | 126.23(18) | C18   | C19  | N4   | 108.2(3) |
| <b>C6</b>   | N2   | C9   | 107.8(2)   | C18   | C19  | C20  | 131.0(3) |
| <b>C4</b>   | N1   | Ga1  | 125.67(18) | C205  | C204 | C203 | 120.4(3) |

|             |      |      |            |      |      |      |          |
|-------------|------|------|------------|------|------|------|----------|
| <b>C1</b>   | N1   | Ga1  | 125.68(17) | C322 | C323 | C324 | 120.3(3) |
| <b>C1</b>   | N1   | C4   | 108.2(2)   | N102 | C109 | C110 | 119.8(2) |
| <b>C101</b> | N101 | Ga10 | 126.67(19) | C108 | C109 | N102 | 109.0(3) |
| <b>C101</b> | N101 | C104 | 107.6(2)   | C108 | C109 | C110 | 130.9(3) |
| <b>C104</b> | N101 | Ga10 | 125.70(19) | C111 | C110 | C124 | 108.8(3) |
| <b>C111</b> | N103 | Ga10 | 125.59(19) | C111 | C110 | C123 | 109.8(3) |
| <b>C114</b> | N103 | Ga10 | 126.7(2)   | C109 | C110 | C111 | 112.1(2) |
| <b>C114</b> | N103 | C111 | 107.6(2)   | C109 | C110 | C124 | 108.7(3) |
| <b>C119</b> | N104 | Ga10 | 125.33(19) | C109 | C110 | C123 | 109.6(3) |
| <b>C116</b> | N104 | Ga10 | 126.8(2)   | C123 | C110 | C124 | 107.9(3) |
| <b>C116</b> | N104 | C119 | 107.7(2)   | C323 | C322 | C321 | 120.3(3) |
| <b>C19</b>  | N4   | Ga1  | 125.91(18) | C14  | C15  | C26  | 108.8(2) |
| <b>C16</b>  | N4   | Ga1  | 126.13(18) | C14  | C15  | C16  | 112.2(2) |
| <b>C16</b>  | N4   | C19  | 107.8(2)   | C14  | C15  | C25  | 109.6(2) |
| <b>C109</b> | N102 | Ga10 | 126.71(19) | C16  | C15  | C26  | 108.7(2) |
| <b>C109</b> | N102 | C106 | 107.5(2)   | C16  | C15  | C25  | 108.8(2) |
| <b>C106</b> | N102 | Ga10 | 125.7(2)   | C25  | C15  | C26  | 108.7(2) |
| <b>C314</b> | C313 | P301 | 119.9(2)   | C316 | C315 | C314 | 120.4(3) |
| <b>C318</b> | C313 | P301 | 119.9(2)   | N102 | C106 | C105 | 120.1(3) |
| <b>C318</b> | C313 | C314 | 120.2(3)   | C107 | C106 | N102 | 108.9(3) |
| <b>N3</b>   | C11  | C10  | 120.5(2)   | C107 | C106 | C105 | 130.8(3) |
| <b>C12</b>  | C11  | N3   | 108.2(2)   | N4   | C16  | C15  | 120.2(2) |
| <b>C12</b>  | C11  | C10  | 131.1(3)   | C17  | C16  | N4   | 108.8(2) |
| <b>N2</b>   | C9   | C10  | 120.9(2)   | C17  | C16  | C15  | 130.8(3) |
| <b>C8</b>   | C9   | N2   | 108.4(2)   | C323 | C324 | C319 | 119.5(3) |
| <b>C8</b>   | C9   | C10  | 130.4(2)   | N101 | C104 | C105 | 120.5(3) |
| <b>C217</b> | C218 | C213 | 119.0(3)   | C103 | C104 | N101 | 109.2(3) |
| <b>C320</b> | C319 | P301 | 118.8(2)   | C103 | C104 | C105 | 130.0(3) |
| <b>C324</b> | C319 | P301 | 120.7(2)   | C119 | C118 | C117 | 107.6(3) |
| <b>C324</b> | C319 | C320 | 120.4(3)   | N103 | C114 | C115 | 120.4(3) |
| <b>C223</b> | C224 | C219 | 119.6(3)   | C113 | C114 | N103 | 108.7(3) |
| <b>C11</b>  | C10  | C9   | 111.5(2)   | C113 | C114 | C115 | 130.6(3) |
| <b>C11</b>  | C10  | C23  | 107.7(2)   | N104 | C116 | C115 | 120.3(3) |
| <b>C11</b>  | C10  | C24  | 110.7(2)   | C117 | C116 | N104 | 109.1(3) |
| <b>C9</b>   | C10  | C23  | 109.5(2)   | C117 | C116 | C115 | 130.6(3) |
| <b>C9</b>   | C10  | C24  | 109.3(2)   | C307 | C312 | C311 | 119.5(3) |
| <b>C24</b>  | C10  | C23  | 108.1(2)   | C305 | C304 | C303 | 120.4(3) |
| <b>C221</b> | C220 | C219 | 119.8(3)   | C203 | C202 | C201 | 119.6(3) |
| <b>C218</b> | C213 | P201 | 121.1(2)   | C101 | C102 | C103 | 107.1(3) |
| <b>C214</b> | C213 | P201 | 118.2(2)   | C111 | C112 | C113 | 107.5(3) |
| <b>C214</b> | C213 | C218 | 120.7(3)   | C209 | C208 | C207 | 119.7(3) |
| <b>C315</b> | C314 | C313 | 119.5(3)   | C316 | C317 | C318 | 120.7(3) |
| <b>C224</b> | C219 | P201 | 121.6(2)   | C1   | C20  | C28  | 109.6(2) |
| <b>C224</b> | C219 | C220 | 120.0(3)   | C1   | C20  | C27  | 108.9(2) |
| <b>C220</b> | C219 | P201 | 118.4(2)   | C19  | C20  | C1   | 111.4(2) |
| <b>C214</b> | C215 | C216 | 119.7(3)   | C19  | C20  | C28  | 109.9(2) |
| <b>N1</b>   | C4   | C5   | 120.9(2)   | C19  | C20  | C27  | 109.0(2) |
| <b>C3</b>   | C4   | N1   | 108.4(2)   | C28  | C20  | C27  | 108.0(3) |
| <b>C3</b>   | C4   | C5   | 130.5(2)   | C106 | C107 | C108 | 107.1(3) |
| <b>C321</b> | C320 | C319 | 119.2(3)   | C317 | C316 | C315 | 120.3(3) |
| <b>C9</b>   | C8   | C7   | 107.5(2)   | C208 | C207 | P201 | 119.3(2) |
| <b>N1</b>   | C1   | C20  | 120.3(2)   | C212 | C207 | P201 | 121.2(2) |
| <b>C2</b>   | C1   | N1   | 108.7(2)   | C212 | C207 | C208 | 119.4(3) |
| <b>C2</b>   | C1   | C20  | 130.9(3)   | C106 | C105 | C122 | 110.0(3) |
| <b>C222</b> | C221 | C220 | 120.2(3)   | C106 | C105 | C121 | 108.7(3) |
| <b>C11</b>  | C12  | C13  | 107.5(2)   | C104 | C105 | C106 | 110.9(2) |
| <b>C222</b> | C223 | C224 | 120.4(3)   | C104 | C105 | C122 | 110.0(3) |
| <b>C119</b> | C120 | C128 | 108.0(2)   | C104 | C105 | C121 | 109.0(3) |
| <b>C119</b> | C120 | C127 | 109.4(2)   | C122 | C105 | C121 | 108.2(3) |
| <b>C101</b> | C120 | C119 | 112.4(2)   | C309 | C308 | C307 | 119.0(3) |
| <b>C101</b> | C120 | C128 | 108.8(2)   | C104 | C103 | C102 | 107.1(3) |
| <b>C101</b> | C120 | C127 | 109.7(2)   | C211 | C212 | C207 | 120.0(3) |
| <b>C127</b> | C120 | C128 | 108.4(2)   | C202 | C203 | C204 | 120.1(3) |

|      |      |      |          |      |      |      |            |
|------|------|------|----------|------|------|------|------------|
| C317 | C318 | C313 | 118.9(3) | C109 | C108 | C107 | 107.6(3)   |
| N104 | C119 | C120 | 121.0(2) | C116 | C117 | C118 | 106.9(3)   |
| C118 | C119 | N104 | 108.7(3) | C305 | C306 | C301 | 119.1(3)   |
| C118 | C119 | C120 | 129.8(3) | C304 | C305 | C306 | 120.4(3)   |
| C301 | C302 | C303 | 119.5(3) | Cl1  | C401 | Cl40 | 110.81(17) |
| C312 | C307 | P301 | 121.8(2) | C310 | C309 | C308 | 119.9(3)   |
| C312 | C307 | C308 | 120.4(3) | C210 | C209 | C208 | 120.4(3)   |
| C308 | C307 | P301 | 117.7(2) | C211 | C210 | C209 | 120.0(3)   |
| C6   | C7   | C8   | 107.3(2) | C114 | C113 | C112 | 107.6(3)   |
| C4   | C3   | C2   | 107.5(2) | C310 | C311 | C312 | 120.6(3)   |
| C215 | C214 | C213 | 119.5(3) | C311 | C310 | C309 | 120.6(3)   |
| C221 | C222 | C223 | 120.1(3) | C210 | C211 | C212 | 120.4(3)   |
| N2   | C6   | C5   | 119.6(2) | C114 | C115 | C116 | 110.7(3)   |
| C7   | C6   | N2   | 108.9(2) | C114 | C115 | C126 | 110.2(3)   |
| C7   | C6   | C5   | 131.3(2) | C114 | C115 | C125 | 109.1(3)   |
| N3   | C14  | C15  | 120.5(2) | C116 | C115 | C126 | 109.3(3)   |
| C13  | C14  | N3   | 108.3(2) | C116 | C115 | C125 | 109.0(3)   |
| C13  | C14  | C15  | 131.0(2) | C126 | C115 | C125 | 108.6(3)   |
| C205 | C206 | C201 | 119.1(3) |      |      |      |            |

[PPh<sub>4</sub>][E<sup>-1</sup>]

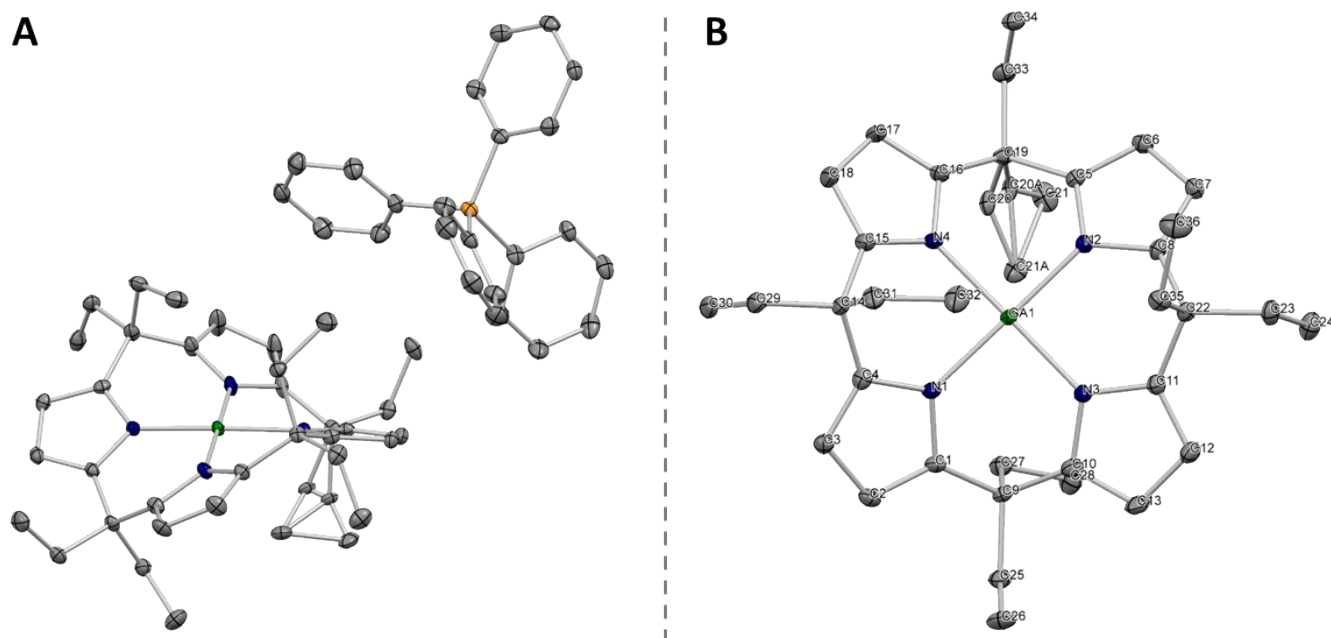

**Figure S6.** **A)** Asymmetric unit of the crystal lattice which was found for [PPh<sub>4</sub>][E<sup>-1</sup>] (monoclinic,  $P2_1/n$ ), and **B)** molecular structures of the anion [E<sup>-1</sup>]<sup>-</sup>, with atom labels. All non-hydrogen thermal displacement ellipsoids are shown at a probability level of 50%.

**Table S4.** Crystal data and structure refinement for [PPh<sub>4</sub>][E<sup>-1</sup>] (mo\_lmsee025\_0m\_a).

|                                           |                                                    |
|-------------------------------------------|----------------------------------------------------|
| CCDC number                               | 2175981                                            |
| Empirical formula                         | C <sub>60</sub> H <sub>68</sub> GaN <sub>4</sub> P |
| Formula weight                            | 945.87                                             |
| Temperature [K]                           | 100.0                                              |
| Crystal system                            | monoclinic                                         |
| Space group (number)                      | $P2_1/n$ (14)                                      |
| <i>a</i> [Å]                              | 11.5827(6)                                         |
| <i>b</i> [Å]                              | 15.4151(5)                                         |
| <i>c</i> [Å]                              | 27.0610(12)                                        |
| $\alpha$ [°]                              | 90                                                 |
| $\beta$ [°]                               | 90.708(2)                                          |
| $\gamma$ [°]                              | 90                                                 |
| Volume [Å <sup>3</sup> ]                  | 4831.3(4)                                          |
| <i>Z</i>                                  | 4                                                  |
| $\rho_{\text{calc}}$ [gcm <sup>-3</sup> ] | 1.300                                              |
| $\mu$ [mm <sup>-1</sup> ]                 | 0.648                                              |

|                                         |                                                          |
|-----------------------------------------|----------------------------------------------------------|
| $F(000)$                                | 2008                                                     |
| Crystal size [mm <sup>3</sup> ]         | 0.231×0.182×0.113                                        |
| Crystal colour                          | colourless                                               |
| Crystal shape                           | block                                                    |
| Radiation                               | MoK $\alpha$ ( $\lambda=0.71073$ Å)                      |
| 2 $\theta$ range [°]                    | 4.40 to 57.61 (0.74 Å)                                   |
| Index ranges                            | -15 ≤ h ≤ 15<br>-20 ≤ k ≤ 19<br>-36 ≤ l ≤ 36             |
| Reflections collected                   | 38808<br>12354                                           |
| Independent reflections                 | $R_{\text{int}} = 0.0785$<br>$R_{\text{sigma}} = 0.0785$ |
| Completeness to $\Theta = 25.242^\circ$ | 98.7 %                                                   |
| Data / Restraints / Parameters          | 12354/0/617                                              |
| Goodness-of-fit on $F^2$                | 1.042                                                    |
| Final $R$ indexes [ $\geq 2\sigma(I)$ ] | $R_1 = 0.0547$<br>$wR_2 = 0.1224$                        |
| Final $R$ indexes [all data]            | $R_1 = 0.0791$<br>$wR_2 = 0.1368$                        |
| Largest peak/hole [eÅ <sup>-3</sup> ]   | 0.63/-0.56                                               |

**Table S5.** Solid state bond lengths found for [PPh<sub>4</sub>][F<sup>-1</sup>] (mo\_lmsee025\_0m\_a).

| Atoms        | Length [Å] | Atoms         | Length [Å] |
|--------------|------------|---------------|------------|
| Ga1_1–N1_1   | 1.954(2)   | C20_1–C21_1   | 1.519(6)   |
| Ga1_1–N2_1   | 1.944(2)   | C21A_1–C20A_1 | 1.497(13)  |
| Ga1_1–N3_1   | 1.943(2)   | C22_1–C23_1   | 1.543(3)   |
| Ga1_1–N4_1   | 1.957(2)   | C22_1–C35_1   | 1.567(3)   |
| N1_1–C1_1    | 1.394(3)   | C23_1–C24_1   | 1.534(4)   |
| N1_1–C4_1    | 1.397(3)   | C25_1–C26_1   | 1.526(3)   |
| C1_1–C2_1    | 1.378(3)   | C27_1–C28_1   | 1.532(3)   |
| C1_1–C9_1    | 1.513(3)   | C29_1–C30_1   | 1.523(4)   |
| N2_1–C5_1    | 1.392(3)   | C31_1–C32_1   | 1.526(4)   |
| N2_1–C8_1    | 1.390(3)   | C33_1–C34_1   | 1.526(4)   |
| C2_1–C3_1    | 1.422(4)   | C35_1–C36_1   | 1.525(4)   |
| N3_1–C10_1   | 1.396(3)   | P1_2–C1_2     | 1.801(3)   |
| N3_1–C11_1   | 1.395(3)   | P1_2–C7_2     | 1.789(3)   |
| C3_1–C4_1    | 1.374(3)   | P1_2–C13_2    | 1.796(3)   |
| N4_1–C15_1   | 1.399(3)   | P1_2–C19_2    | 1.802(3)   |
| N4_1–C16_1   | 1.389(3)   | C1_2–C2_2     | 1.397(4)   |
| C4_1–C14_1   | 1.510(3)   | C1_2–C6_2     | 1.399(4)   |
| C5_1–C6_1    | 1.376(3)   | C2_2–C3_2     | 1.392(4)   |
| C5_1–C19_1   | 1.513(3)   | C3_2–C4_2     | 1.378(4)   |
| C6_1–C7_1    | 1.425(3)   | C4_2–C5_2     | 1.386(4)   |
| C7_1–C8_1    | 1.371(3)   | C5_2–C6_2     | 1.389(4)   |
| C8_1–C22_1   | 1.520(3)   | C7_2–C8_2     | 1.393(4)   |
| C9_1–C10_1   | 1.512(3)   | C7_2–C12_2    | 1.398(3)   |
| C9_1–C25_1   | 1.545(3)   | C8_2–C9_2     | 1.392(4)   |
| C9_1–C27_1   | 1.561(3)   | C9_2–C10_2    | 1.392(4)   |
| C10_1–C13_1  | 1.378(3)   | C10_2–C11_2   | 1.384(4)   |
| C11_1–C12_1  | 1.377(3)   | C11_2–C12_2   | 1.388(4)   |
| C11_1–C22_1  | 1.513(3)   | C13_2–C14_2   | 1.399(4)   |
| C12_1–C13_1  | 1.421(4)   | C13_2–C18_2   | 1.394(4)   |
| C14_1–C15_1  | 1.503(3)   | C14_2–C15_2   | 1.390(4)   |
| C14_1–C29_1  | 1.554(3)   | C15_2–C16_2   | 1.384(4)   |
| C14_1–C31_1  | 1.559(4)   | C16_2–C17_2   | 1.388(4)   |
| C15_1–C18_1  | 1.377(4)   | C17_2–C18_2   | 1.388(4)   |
| C16_1–C17_1  | 1.377(4)   | C19_2–C20_2   | 1.398(4)   |
| C16_1–C19_1  | 1.511(4)   | C19_2–C24_2   | 1.397(4)   |
| C17_1–C18_1  | 1.423(4)   | C20_2–C21_2   | 1.386(4)   |
| C19_1–C20_1  | 1.547(5)   | C21_2–C22_2   | 1.383(4)   |
| C19_1–C20A_1 | 1.651(10)  | C22_2–C23_2   | 1.387(4)   |

**Table S6.** Solid state bond angles found for [PPh<sub>4</sub>]<sup>[E<sup>+</sup>1]</sup> (mo\_lmsee025\_0m\_a).

| Atoms             | Angle [°]  | Atoms               | Angle [°]  |
|-------------------|------------|---------------------|------------|
| N1_1–Ga1_1–N4_1   | 89.10(8)   | C5_1–C19_1–C20_1    | 111.5(2)   |
| N2_1–Ga1_1–N1_1   | 177.82(8)  | C5_1–C19_1–C20A_1   | 104.2(4)   |
| N2_1–Ga1_1–N4_1   | 90.20(8)   | C5_1–C19_1–C33_1    | 110.2(2)   |
| N3_1–Ga1_1–N1_1   | 90.41(8)   | C16_1–C19_1–C5_1    | 111.6(2)   |
| N3_1–Ga1_1–N2_1   | 90.28(8)   | C16_1–C19_1–C20_1   | 101.8(2)   |
| N3_1–Ga1_1–N4_1   | 179.48(9)  | C16_1–C19_1–C20A_1  | 121.3(4)   |
| C1_1–N1_1–Ga1_1   | 126.29(16) | C16_1–C19_1–C33_1   | 109.6(2)   |
| C1_1–N1_1–C4_1    | 107.31(19) | C33_1–C19_1–C20_1   | 111.8(2)   |
| C4_1–N1_1–Ga1_1   | 126.40(16) | C33_1–C19_1–C20A_1  | 98.9(4)    |
| N1_1–C1_1–C9_1    | 120.7(2)   | C21_1–C20_1–C19_1   | 114.1(3)   |
| C2_1–C1_1–N1_1    | 108.9(2)   | C21A_1–C20A_1–C19_1 | 113.7(7)   |
| C2_1–C1_1–C9_1    | 130.2(2)   | C8_1–C22_1–C23_1    | 110.27(19) |
| C5_1–N2_1–Ga1_1   | 125.79(16) | C8_1–C22_1–C35_1    | 109.6(2)   |
| C8_1–N2_1–Ga1_1   | 126.66(16) | C11_1–C22_1–C8_1    | 110.89(19) |
| C8_1–N2_1–C5_1    | 107.41(19) | C11_1–C22_1–C23_1   | 110.5(2)   |
| C1_1–C2_1–C3_1    | 107.3(2)   | C11_1–C22_1–C35_1   | 107.58(19) |
| C10_1–N3_1–Ga1_1  | 126.04(16) | C23_1–C22_1–C35_1   | 107.88(19) |
| C11_1–N3_1–Ga1_1  | 126.78(17) | C24_1–C23_1–C22_1   | 117.8(2)   |
| C11_1–N3_1–C10_1  | 107.2(2)   | C26_1–C25_1–C9_1    | 118.1(2)   |
| C4_1–C3_1–C2_1    | 107.7(2)   | C28_1–C27_1–C9_1    | 116.1(2)   |
| C15_1–N4_1–Ga1_1  | 126.09(17) | C30_1–C29_1–C14_1   | 117.3(2)   |
| C16_1–N4_1–Ga1_1  | 126.54(17) | C32_1–C31_1–C14_1   | 117.2(2)   |
| C16_1–N4_1–C15_1  | 107.3(2)   | C34_1–C33_1–C19_1   | 116.2(2)   |
| N1_1–C4_1–C14_1   | 121.8(2)   | C36_1–C35_1–C22_1   | 116.5(2)   |
| C3_1–C4_1–N1_1    | 108.8(2)   | C1_2–P1_2–C19_2     | 110.69(12) |
| C3_1–C4_1–C14_1   | 129.2(2)   | C7_2–P1_2–C1_2      | 108.31(12) |
| N2_1–C5_1–C19_1   | 122.7(2)   | C7_2–P1_2–C13_2     | 107.14(12) |
| C6_1–C5_1–N2_1    | 108.7(2)   | C7_2–P1_2–C19_2     | 110.08(12) |
| C6_1–C5_1–C19_1   | 128.2(2)   | C13_2–P1_2–C1_2     | 111.43(12) |
| C5_1–C6_1–C7_1    | 107.5(2)   | C13_2–P1_2–C19_2    | 109.13(12) |
| C8_1–C7_1–C6_1    | 107.1(2)   | C2_2–C1_2–P1_2      | 120.45(19) |
| N2_1–C8_1–C22_1   | 121.7(2)   | C2_2–C1_2–C6_2      | 119.9(2)   |
| C7_1–C8_1–N2_1    | 109.3(2)   | C6_2–C1_2–P1_2      | 119.68(19) |
| C7_1–C8_1–C22_1   | 128.8(2)   | C3_2–C2_2–C1_2      | 119.7(2)   |
| C1_1–C9_1–C25_1   | 110.31(19) | C4_2–C3_2–C2_2      | 120.3(3)   |
| C1_1–C9_1–C27_1   | 107.78(19) | C3_2–C4_2–C5_2      | 120.3(2)   |
| C10_1–C9_1–C1_1   | 111.2(2)   | C4_2–C5_2–C6_2      | 120.4(3)   |
| C10_1–C9_1–C25_1  | 110.6(2)   | C5_2–C6_2–C1_2      | 119.5(2)   |
| C10_1–C9_1–C27_1  | 108.85(19) | C8_2–C7_2–P1_2      | 120.92(19) |
| C25_1–C9_1–C27_1  | 108.0(2)   | C8_2–C7_2–C12_2     | 119.8(2)   |
| N3_1–C10_1–C9_1   | 120.8(2)   | C12_2–C7_2–P1_2     | 119.3(2)   |
| C13_1–C10_1–N3_1  | 109.0(2)   | C9_2–C8_2–C7_2      | 119.8(2)   |
| C13_1–C10_1–C9_1  | 129.2(2)   | C8_2–C9_2–C10_2     | 120.0(2)   |
| N3_1–C11_1–C22_1  | 121.8(2)   | C11_2–C10_2–C9_2    | 120.3(2)   |
| C12_1–C11_1–N3_1  | 108.9(2)   | C10_2–C11_2–C12_2   | 119.9(2)   |
| C12_1–C11_1–C22_1 | 128.9(2)   | C11_2–C12_2–C7_2    | 120.2(2)   |
| C11_1–C12_1–C13_1 | 107.5(2)   | C14_2–C13_2–P1_2    | 119.2(2)   |
| C10_1–C13_1–C12_1 | 107.3(2)   | C18_2–C13_2–P1_2    | 121.7(2)   |
| C4_1–C14_1–C29_1  | 109.9(2)   | C18_2–C13_2–C14_2   | 119.0(2)   |
| C4_1–C14_1–C31_1  | 110.6(2)   | C15_2–C14_2–C13_2   | 120.4(3)   |
| C15_1–C14_1–C4_1  | 112.0(2)   | C16_2–C15_2–C14_2   | 119.9(3)   |
| C15_1–C14_1–C29_1 | 109.3(2)   | C15_2–C16_2–C17_2   | 120.4(3)   |
| C15_1–C14_1–C31_1 | 109.7(2)   | C18_2–C17_2–C16_2   | 119.9(3)   |
| C29_1–C14_1–C31_1 | 105.1(2)   | C17_2–C18_2–C13_2   | 120.5(3)   |
| N4_1–C15_1–C14_1  | 122.2(2)   | C20_2–C19_2–P1_2    | 120.5(2)   |
| C18_1–C15_1–N4_1  | 108.8(2)   | C24_2–C19_2–P1_2    | 119.1(2)   |
| C18_1–C15_1–C14_1 | 128.9(2)   | C24_2–C19_2–C20_2   | 120.2(2)   |

|                   |          |                   |          |
|-------------------|----------|-------------------|----------|
| N4_1–C16_1–C19_1  | 121.4(2) | C21_2–C20_2–C19_2 | 119.4(2) |
| C17_1–C16_1–N4_1  | 109.2(2) | C22_2–C21_2–C20_2 | 120.6(3) |
| C17_1–C16_1–C19_1 | 129.1(2) | C21_2–C22_2–C23_2 | 120.0(3) |
| C16_1–C17_1–C18_1 | 107.3(2) | C22_2–C23_2–C24_2 | 120.5(3) |
| C15_1–C18_1–C17_1 | 107.4(2) | C23_2–C24_2–C19_2 | 119.4(2) |

[PPh<sub>4</sub>][<sup>Me</sup>1-thf]

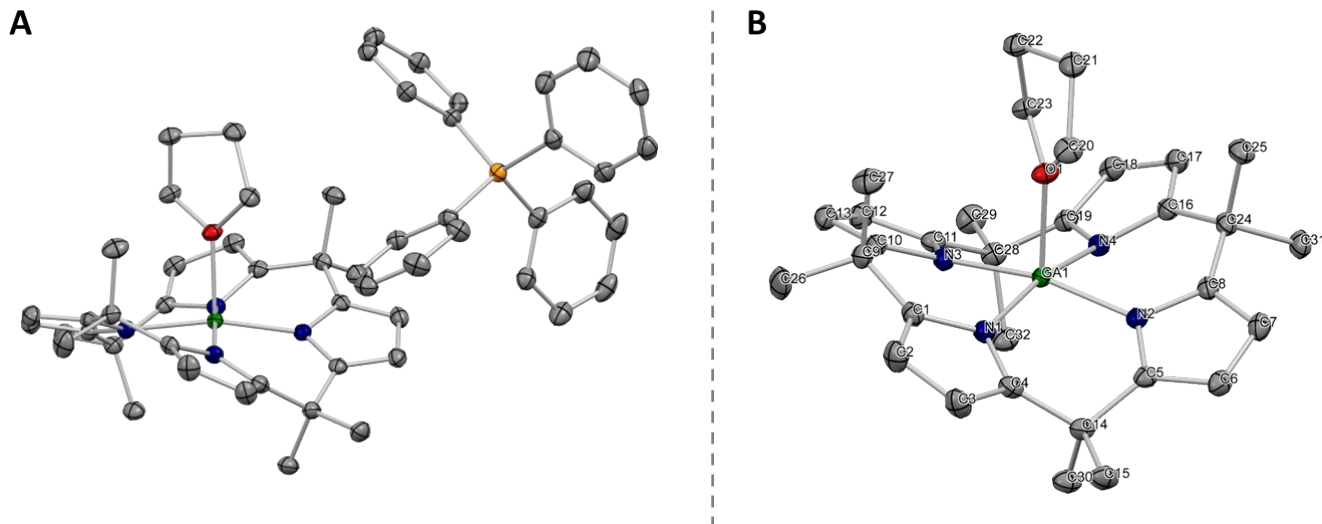

**Figure S7.** **A)** Asymmetric unit of the crystal lattice which was found for [PPh<sub>4</sub>][<sup>Me</sup>1-thf] (monoclinic, *P2<sub>1</sub>/c*), and **B)** molecular structures of the anion [<sup>Me</sup>1-thf]<sup>-</sup>, with atom labels. All non-hydrogen thermal displacement ellipsoids are shown at a probability level of 50%.

**Table S7.** Crystal data and structure refinement for [PPh<sub>4</sub>][<sup>Me</sup>1-thf] (mo\_LMSEE019\_0m).

|                                           |                                                                                 |
|-------------------------------------------|---------------------------------------------------------------------------------|
| CCDC number                               | 2175983                                                                         |
| Empirical formula                         | C <sub>56</sub> H <sub>60</sub> GaN <sub>4</sub> OP                             |
| Formula weight                            | 905.77                                                                          |
| Temperature [K]                           | 100(2)                                                                          |
| Crystal system                            | monoclinic                                                                      |
| Space group (number)                      | <i>P2<sub>1</sub>/c</i> (14)                                                    |
| <i>a</i> [Å]                              | 13.0677(6)                                                                      |
| <i>b</i> [Å]                              | 21.4060(11)                                                                     |
| <i>c</i> [Å]                              | 17.1423(7)                                                                      |
| $\alpha$ [°]                              | 90                                                                              |
| $\beta$ [°]                               | 108.630(2)                                                                      |
| $\gamma$ [°]                              | 90                                                                              |
| Volume [Å <sup>3</sup> ]                  | 4543.9(4)                                                                       |
| <i>Z</i>                                  | 4                                                                               |
| $\rho_{\text{calc}}$ [gcm <sup>-3</sup> ] | 1.324                                                                           |
| $\mu$ [mm <sup>-1</sup> ]                 | 0.687                                                                           |
| <i>F</i> (000)                            | 1912                                                                            |
| Crystal size [mm <sup>3</sup> ]           | 0.694×0.453×0.342                                                               |
| Crystal colour                            | yellow                                                                          |
| Crystal shape                             | block                                                                           |
| Radiation                                 | MoK $\alpha$ ( $\lambda$ =0.71073 Å)                                            |
| 2 $\theta$ range [°]                      | 3.80 to 55.15 (0.77 Å)                                                          |
| Index ranges                              | -16 ≤ <i>h</i> ≤ 16<br>-27 ≤ <i>k</i> ≤ 27<br>-22 ≤ <i>l</i> ≤ 22               |
| Reflections collected                     | 302121                                                                          |
| Independent reflections                   | 10488<br><i>R</i> <sub>int</sub> = 0.0585<br><i>R</i> <sub>sigma</sub> = 0.0183 |
| Completeness to $\Theta$ = 25.242°        | 99.8 %                                                                          |
| Data / Restraints /                       | 10488/0/576                                                                     |



| Parameters                                 |                                   |
|--------------------------------------------|-----------------------------------|
| Goodness-of-fit on $F^2$                   | 1.061                             |
| Final $R$ indexes<br>[ $\geq 2\sigma(I)$ ] | $R_1 = 0.0254$<br>$wR_2 = 0.0689$ |
| Final $R$ indexes<br>[all data]            | $R_1 = 0.0272$<br>$wR_2 = 0.0700$ |
| Largest peak/hole [ $e\text{\AA}^{-3}$ ]   | 0.43/-0.37                        |

**Table S8.** Solid state bond lengths found for [PPh<sub>4</sub>][Me<sup>+</sup>1-thf] (mo\_LMSEE019\_0m).

| Atoms       | Length [Å] | Atoms       | Length [Å] |
|-------------|------------|-------------|------------|
| Ga1_1–N2_1  | 1.9841(10) | C18_1–C19_1 | 1.3757(16) |
| Ga1_1–N1_1  | 1.9853(10) | C19_1–C28_1 | 1.5064(16) |
| Ga1_1–N3_1  | 1.9992(10) | C20_1–C21_1 | 1.5273(17) |
| Ga1_1–N4_1  | 2.0041(9)  | C21_1–C22_1 | 1.5239(18) |
| Ga1_1–O1_1  | 2.0230(8)  | C22_1–C23_1 | 1.5173(16) |
| O1_1–C20_1  | 1.4611(14) | C24_1–C25_1 | 1.5485(16) |
| O1_1–C23_1  | 1.4673(14) | C24_1–C31_1 | 1.5513(15) |
| N1_1–C4_1   | 1.3851(15) | C28_1–C29_1 | 1.5371(16) |
| N1_1–C1_1   | 1.3916(14) | C28_1–C32_1 | 1.5473(16) |
| C1_1–C2_1   | 1.3763(17) | P1_2–C7_2   | 1.7895(12) |
| C1_1–C9_1   | 1.5086(16) | P1_2–C13_2  | 1.7933(12) |
| N2_1–C5_1   | 1.3857(15) | P1_2–C1_2   | 1.7933(12) |
| N2_1–C8_1   | 1.3926(14) | P1_2–C19_2  | 1.7986(12) |
| C2_1–C3_1   | 1.4139(18) | C1_2–C6_2   | 1.3991(16) |
| N3_1–C11_1  | 1.3851(14) | C1_2–C2_2   | 1.4053(16) |
| N3_1–C10_1  | 1.3923(14) | C2_2–C3_2   | 1.3848(17) |
| C3_1–C4_1   | 1.3755(17) | C3_2–C4_2   | 1.3928(17) |
| N4_1–C19_1  | 1.3855(15) | C4_2–C5_2   | 1.3905(17) |
| N4_1–C16_1  | 1.3935(15) | C5_2–C6_2   | 1.3890(17) |
| C4_1–C14_1  | 1.5051(16) | C7_2–C12_2  | 1.3917(17) |
| C5_1–C6_1   | 1.3762(16) | C7_2–C8_2   | 1.4010(17) |
| C5_1–C14_1  | 1.5083(16) | C8_2–C9_2   | 1.3868(17) |
| C6_1–C7_1   | 1.4121(18) | C9_2–C10_2  | 1.3868(18) |
| C7_1–C8_1   | 1.3800(17) | C10_2–C11_2 | 1.384(2)   |
| C8_1–C24_1  | 1.5159(16) | C11_2–C12_2 | 1.3938(18) |
| C9_1–C10_1  | 1.5178(16) | C13_2–C14_2 | 1.3908(18) |
| C9_1–C26_1  | 1.5441(16) | C13_2–C18_2 | 1.3991(18) |
| C9_1–C27_1  | 1.5468(17) | C14_2–C15_2 | 1.3948(17) |
| C10_1–C13_1 | 1.3773(16) | C15_2–C16_2 | 1.385(2)   |
| C11_1–C12_1 | 1.3739(16) | C16_2–C17_2 | 1.382(2)   |
| C11_1–C28_1 | 1.5082(16) | C17_2–C18_2 | 1.3861(19) |
| C12_1–C13_1 | 1.4185(17) | C19_2–C24_2 | 1.3882(18) |
| C14_1–C15_1 | 1.5344(16) | C19_2–C20_2 | 1.3999(17) |
| C14_1–C30_1 | 1.5496(16) | C20_2–C21_2 | 1.3887(19) |
| C16_1–C17_1 | 1.3805(16) | C21_2–C22_2 | 1.380(2)   |
| C16_1–C24_1 | 1.5160(16) | C22_2–C23_2 | 1.383(2)   |
| C17_1–C18_1 | 1.4203(18) | C23_2–C24_2 | 1.3928(19) |

**Table S9.** Solid state bond angles found for [PPh<sub>4</sub>][E<sup>+</sup>1] (mo\_LMSEE019\_0m).

| Atoms            | Angle [°] | Atoms             | Angle [°]  |
|------------------|-----------|-------------------|------------|
| N2_1–Ga1_1–N1_1  | 90.87(4)  | N4_1–C16_1–C24_1  | 125.41(10) |
| N2_1–Ga1_1–N3_1  | 166.32(4) | C16_1–C17_1–C18_1 | 107.24(10) |
| N1_1–Ga1_1–N3_1  | 87.48(4)  | C19_1–C18_1–C17_1 | 106.83(10) |
| N2_1–Ga1_1–N4_1  | 87.00(4)  | C18_1–C19_1–N4_1  | 110.03(10) |
| N1_1–Ga1_1–N4_1  | 166.66(4) | C18_1–C19_1–C28_1 | 129.57(11) |
| N3_1–Ga1_1–N4_1  | 91.48(4)  | N4_1–C19_1–C28_1  | 120.23(10) |
| N2_1–Ga1_1–O1_1  | 99.73(4)  | O1_1–C20_1–C21_1  | 105.04(10) |
| N1_1–Ga1_1–O1_1  | 100.57(4) | C22_1–C21_1–C20_1 | 103.24(10) |
| N3_1–Ga1_1–O1_1  | 93.92(4)  | C23_1–C22_1–C21_1 | 103.46(10) |
| N4_1–Ga1_1–O1_1  | 92.76(4)  | O1_1–C23_1–C22_1  | 104.04(9)  |
| C20_1–O1_1–C23_1 | 110.86(9) | C8_1–C24_1–C16_1  | 114.64(9)  |

|                   |            |                   |            |
|-------------------|------------|-------------------|------------|
| C20_1-O1_1-Ga1_1  | 129.65(7)  | C8_1-C24_1-C25_1  | 110.41(10) |
| C23_1-O1_1-Ga1_1  | 119.41(7)  | C16_1-C24_1-C25_1 | 110.02(10) |
| C4_1-N1_1-C1_1    | 106.57(9)  | C8_1-C24_1-C31_1  | 107.05(10) |
| C4_1-N1_1-Ga1_1   | 127.06(8)  | C16_1-C24_1-C31_1 | 107.58(9)  |
| C1_1-N1_1-Ga1_1   | 125.84(8)  | C25_1-C24_1-C31_1 | 106.76(9)  |
| C2_1-C1_1-N1_1    | 109.30(11) | C19_1-C28_1-C11_1 | 110.08(9)  |
| C2_1-C1_1-C9_1    | 125.75(11) | C19_1-C28_1-C29_1 | 109.96(10) |
| N1_1-C1_1-C9_1    | 124.94(10) | C11_1-C28_1-C29_1 | 109.87(10) |
| C5_1-N2_1-C8_1    | 106.73(9)  | C19_1-C28_1-C32_1 | 109.12(10) |
| C5_1-N2_1-Ga1_1   | 127.04(8)  | C11_1-C28_1-C32_1 | 109.80(10) |
| C8_1-N2_1-Ga1_1   | 125.92(8)  | C29_1-C28_1-C32_1 | 107.97(10) |
| C1_1-C2_1-C3_1    | 107.35(11) | C7_2-P1_2-C13_2   | 110.07(6)  |
| C11_1-N3_1-C10_1  | 106.75(9)  | C7_2-P1_2-C1_2    | 106.00(5)  |
| C11_1-N3_1-Ga1_1  | 127.16(8)  | C13_2-P1_2-C1_2   | 112.09(6)  |
| C10_1-N3_1-Ga1_1  | 124.52(8)  | C7_2-P1_2-C19_2   | 110.26(6)  |
| C4_1-C3_1-C2_1    | 106.97(11) | C13_2-P1_2-C19_2  | 106.39(6)  |
| C16_1-N4_1-Ga1_1  | 121.67(8)  | C1_2-P1_2-C19_2   | 112.08(6)  |
| C3_1-C4_1-N1_1    | 109.79(11) | C6_2-C1_2-C2_2    | 120.61(11) |
| C3_1-C4_1-C14_1   | 128.17(11) | C6_2-C1_2-P1_2    | 122.36(9)  |
| N1_1-C4_1-C14_1   | 121.35(10) | C2_2-C1_2-P1_2    | 116.95(9)  |
| C6_1-C5_1-N2_1    | 109.73(10) | C3_2-C2_2-C1_2    | 119.46(11) |
| C6_1-C5_1-C14_1   | 128.06(11) | C2_2-C3_2-C4_2    | 119.84(11) |
| N2_1-C5_1-C14_1   | 121.85(10) | C5_2-C4_2-C3_2    | 120.78(11) |
| C5_1-C6_1-C7_1    | 107.02(11) | C6_2-C5_2-C4_2    | 120.06(11) |
| C8_1-C7_1-C6_1    | 107.48(11) | C5_2-C6_2-C1_2    | 119.25(11) |
| C7_1-C8_1-N2_1    | 109.03(10) | C12_2-C7_2-C8_2   | 120.37(11) |
| C7_1-C8_1-C24_1   | 125.27(11) | C12_2-C7_2-P1_2   | 122.17(10) |
| N2_1-C8_1-C24_1   | 125.69(10) | C8_2-C7_2-P1_2    | 117.44(9)  |
| C1_1-C9_1-C10_1   | 113.55(9)  | C9_2-C8_2-C7_2    | 119.81(11) |
| C1_1-C9_1-C26_1   | 107.90(10) | C10_2-C9_2-C8_2   | 119.67(12) |
| C10_1-C9_1-C26_1  | 107.81(10) | C11_2-C10_2-C9_2  | 120.73(12) |
| C1_1-C9_1-C27_1   | 109.75(10) | C10_2-C11_2-C12_2 | 120.20(12) |
| C10_1-C9_1-C27_1  | 110.90(10) | C7_2-C12_2-C11_2  | 119.23(12) |
| C26_1-C9_1-C27_1  | 106.63(10) | C14_2-C13_2-C18_2 | 120.27(12) |
| C13_1-C10_1-N3_1  | 109.06(10) | C14_2-C13_2-P1_2  | 120.60(9)  |
| C13_1-C10_1-C9_1  | 125.62(10) | C18_2-C13_2-P1_2  | 119.04(10) |
| N3_1-C10_1-C9_1   | 125.31(10) | C13_2-C14_2-C15_2 | 119.55(12) |
| C12_1-C11_1-N3_1  | 109.91(10) | C16_2-C15_2-C14_2 | 120.02(13) |
| C12_1-C11_1-C28_1 | 128.85(11) | C17_2-C16_2-C15_2 | 120.30(12) |
| N3_1-C11_1-C28_1  | 121.18(10) | C16_2-C17_2-C18_2 | 120.49(13) |
| C11_1-C12_1-C13_1 | 106.77(10) | C17_2-C18_2-C13_2 | 119.36(13) |
| C10_1-C13_1-C12_1 | 107.50(10) | C24_2-C19_2-C20_2 | 120.14(12) |
| C4_1-C14_1-C5_1   | 112.36(9)  | C24_2-C19_2-P1_2  | 121.38(10) |
| C4_1-C14_1-C15_1  | 109.74(10) | C20_2-C19_2-P1_2  | 118.46(10) |
| C5_1-C14_1-C15_1  | 109.60(10) | C21_2-C20_2-C19_2 | 119.80(12) |
| C4_1-C14_1-C30_1  | 107.97(10) | C22_2-C21_2-C20_2 | 119.92(12) |
| C5_1-C14_1-C30_1  | 109.03(10) | C21_2-C22_2-C23_2 | 120.40(12) |
| C15_1-C14_1-C30_1 | 108.03(9)  | C22_2-C23_2-C24_2 | 120.45(13) |
| C17_1-C16_1-N4_1  | 109.29(10) | C19_2-C24_2-C23_2 | 119.28(12) |
| C17_1-C16_1-C24_1 | 125.16(11) |                   |            |

## S8. Computational details and results

All quantum chemical calculations were carried out with Orca 5.0.1<sup>5-6</sup> making use of the computational resources of the bwForClusters JUSTUS2 at Ulm University within the Baden-Württemberg High Performance Computing program (bwHPC). Ball and stick representations and isodensity surfaces were rendered with Chemcraft 1.8<sup>27</sup>. xyz Coordinates and computed energies are given in Chapter S11.

### **General remarks**

Conformational spaces, especially of structures of the ethyl version of the ligand, were initially explored with the conformer-rotamer ensemble sampling tool (CREST)<sup>28</sup> for the xtb program package<sup>29</sup> using the following command line input. The lowest-energy conformer was then reoptimized as described below.

```
crest [file_name].xyz --alpb CH2Cl2 --chrg [charge] --noreftopo > [file_name].out
```

Structure optimizations on the Kohn-Sham DFT level were done with the r<sup>2</sup>SCAN-3c composite method.<sup>30</sup> The RIJCOSX Fock-matrix formation algorithm was used along with the respective automatically generated auxiliary basis sets (AutoAux)<sup>31</sup>. The RIJCOSX scheme combines the chain of spheres exchange approximation (COSX)<sup>32</sup> for the computation of the exchange matrix with the split-RI-J algorithm<sup>33</sup> for the calculation of the Coulomb matrix. All equilibrium structures were confirmed to possess only positive Hessian matrix eigenvalues by analytic frequency calculations. The following Orca keyword line was used.

```
! r2SCAN-3c RIJCOSX AutoAux VeryTightSCF Opt Freq
```

Transition structures were optimized toward a single negative Hessian matrix eigenvalue using the OptTS keyword. It was ensured that the correct first-order saddle point on the potential energy surface was located by animation of the imaginary frequency in Chemcraft and by following the intrinsic reaction coordinate (IRC) by invoking the IRC keyword. TolRMSG was set to 3e-5 a.u. and TolMaxG to 1e-4 a.u..

Structural constraints (for the structural optimization of [Me<sub>4</sub>]<sup>-</sup> with a tetrahedral configuration around gallium) were introduced with the Constraints option inside the %geom block.

Final single point energies were calculated with the RI-DSD-PBEP86/2013 spin-component-scaled double hybrid functional<sup>34-35</sup>, including the D3(BJ) correction<sup>36-37</sup>. The def2-QZVPP set of basis functions was used.<sup>38</sup> Again, the RIJCOSX combined with the AutoAux keywords were included. The VeryTightSCF convergence settings were kept, and the integration grid was changed to DefGrid3. The keyword line was:

```
! RI-DSD-PBEP86/2013 D3BJ def2-QZVPP RIJCOSX AutoAux DefGrid3 VeryTightSCF
```

Enthalpies and Gibbs free energies at 298.15 K and 1 atm were calculated with the electronic energies from the double hybrid functional calculations combined with the corrections to enthalpies and Gibbs free energies<sup>39</sup>, respectively, from the frequency calculations.

Finally, solvent influences were included implicitly at T = 298.15 K with the conductor like screening model for real solvents (COSMO-RS)<sup>40-42</sup> as it is implemented<sup>43</sup> in the Amsterdam Modeling suite (ADF 2019.304)<sup>44</sup>. The ADF-preset parameters were used, except for the maximum number of iterations, which were set to zero. COSMO-RS corrections for enthalpies were achieved by calculating  $\Delta G$ -corrections at five different temperatures (278.15, 288.15, 298.15, 308.15, 318.15 K) and with help of  $\Delta G = \Delta H - T\Delta S$ .

Natural population analysis were done on the PBE0/def2-TZVPP level of theory interfacing Orca 5.0.1 with the NBO6 program.<sup>45</sup> To get the molecular orbitals within a natural atomic orbital basis, the NAOMO keyword was included inside the %nbo block.

```
! PBE0 def2-TZVPP NoRI VeryTightSCF DefGrid3 NBO
%nbo
NBOKEYLIST = "$NBO NAOMO $END"
end
```

### **Assessment of structural strain**

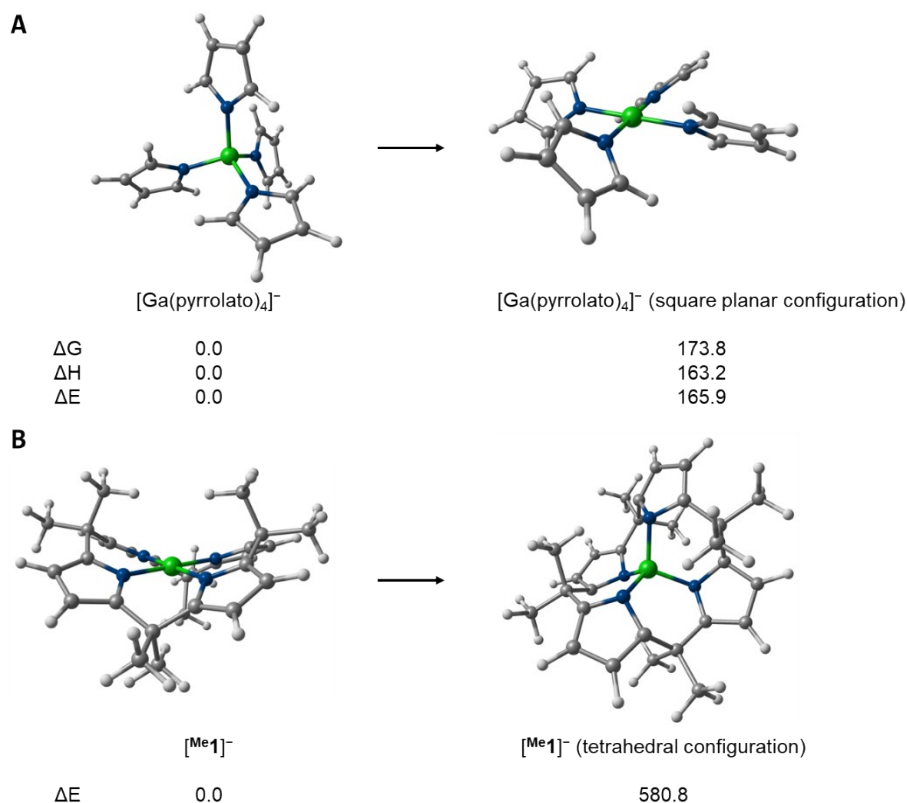

**Figure S8.** Energetic characteristics for **A**) the deformation of tetrapyrrolato gallate ([Ga(pyrrolato)<sub>4</sub>]<sup>-</sup> toward square planarity, and of **B**) [Me1]<sup>-</sup> toward a tetrahedral arrangement around the gallium center. The calculations were done on the RI-DSD-PBEP86/2013-D3(BJ)/def2-QZVPP//r<sup>2</sup>SCAN-3c level of theory. All numbers are given in kJ mol<sup>-1</sup>.

### Fluoride ion affinities

Fluoride ion affinities (FIA, ΔH values) were calculated as described in the literature using the fluorotrimethylsilane anchoring system.<sup>46</sup> The anchoring enthalpy (952.5 kJ mol<sup>-1</sup>, reaction enthalpy for the dissociation of fluorotrimethylsilane into the trimethylsilyl cation and the fluoride anion) was taken from the cited paper. To account for the solvation influences (CH<sub>2</sub>Cl<sub>2</sub>), the COSMO-RS scheme was used as described above for the fluoride adduct formation reaction of the molecule under investigation. The COSMO-RS correction to the enthalpy of the fluoride ion was calculated explicitly to -341.75 kJ mol<sup>-1</sup>.

**Table S10.** Calculated gas and solution (CH<sub>2</sub>Cl<sub>2</sub>) phase fluoride ion affinities (FIA). The calculations were done on the RI-DSD-PBEP86/2013-D3(BJ)/def2-QZVPP//r<sup>2</sup>SCAN-3c, COSMO-RS(CH<sub>2</sub>Cl<sub>2</sub>) level of theory. All numbers are given in kJ mol<sup>-1</sup>.

|                                            | FIA <sub>gasphase</sub> | FIA <sub>solution</sub> |
|--------------------------------------------|-------------------------|-------------------------|
| [Me1] <sup>-</sup>                         | 80.1                    | 149.0                   |
| [Et1] <sup>-</sup>                         | 90.8                    | 131.8                   |
| [Me1(Al)] <sup>-</sup>                     | 129.5                   | 196.4                   |
| [H-Me1*]                                   | 383.9                   | 190.7                   |
| [Ga(pyrrolato) <sub>4</sub> ] <sup>-</sup> | -41.4                   | 57.7                    |
| Ph <sub>3</sub> SiF                        | 263.2                   | 85.1                    |

### Reactivity with CO<sub>2</sub>

The addition reaction of CO<sub>2</sub> to [Me1]<sup>-</sup> was studied by quantum chemical calculations. In the case of the analogous aluminum compound ([Me1(Al)]<sup>-</sup>), a transition state accounting for the entrance of CO<sub>2</sub> into the coordination sphere of Al and the subsequent intermediate in which CO<sub>2</sub> is coordinating to Al was located.<sup>47</sup> Such structures are not accessible for [Me1]<sup>-</sup>. Structural optimization of the coordination intermediate resulted in constant dissociation of the two reactants. This was also found with various other DFT methods than the one described above (r<sup>2</sup>SCAN-3c). The inclusion of the SMD model for dichloromethane did not change this outcome either.

The transition states for the C-C bond formation/cleavage and the gallium-ligand cooperative addition products were readily located for [Me1]<sup>-</sup> and [Et1]<sup>-</sup>. The conformational space of [Et1\*-CO<sub>2</sub>]<sup>-</sup> was analyzed by CREST (see above for details) and the lowest-energy

conformer was reoptimized with the r<sup>2</sup>SCAN-3c method. The ethyl group conformations as found for [Et<sup>1\*</sup>-CO<sub>2</sub>]<sup>-</sup> were kept for the transition structure optimization.

Following the IRC in the C-C cleavage direction with the [Me<sup>1</sup>]<sup>-</sup> system also suggested the above-described non-existence of the coordination intermediate.

**Table S11.** Activation energies / enthalpies / Gibbs free energies in the gas phase and in solution (CH<sub>2</sub>Cl<sub>2</sub>) for the C-C bond formation/cleavage transition state for the element ligand cooperative addition of CO<sub>2</sub> (top part) and the respective reaction energies / enthalpies / Gibbs free energies. The calculations were done on the RI-DSD-PBEP86/2013-D3(BJ)/def2-QZVPP//r<sup>2</sup>SCAN-3c, COSMO-RS(CH<sub>2</sub>Cl<sub>2</sub>) level of theory. All numbers are given in kJ mol<sup>-1</sup>.

| [R <sup>1</sup> ] <sup>-</sup> or [Me <sup>1</sup> (Al)] <sup>-</sup> + CO <sub>2</sub> → C-C bond formation/cleavage transition state                                                              |                                         |                                         |                                         |                                         |                                         |
|-----------------------------------------------------------------------------------------------------------------------------------------------------------------------------------------------------|-----------------------------------------|-----------------------------------------|-----------------------------------------|-----------------------------------------|-----------------------------------------|
|                                                                                                                                                                                                     | $\Delta E_{\text{gasphase}}^{\ddagger}$ | $\Delta H_{\text{gasphase}}^{\ddagger}$ | $\Delta G_{\text{gasphase}}^{\ddagger}$ | $\Delta H_{\text{solution}}^{\ddagger}$ | $\Delta G_{\text{solution}}^{\ddagger}$ |
| [Me <sup>1</sup> ] <sup>-</sup>                                                                                                                                                                     | 30.6                                    | 31.6                                    | 79.8                                    | 50.7                                    | 90.3                                    |
| [Et <sup>1</sup> ] <sup>-</sup>                                                                                                                                                                     | 30.5                                    | 30.0                                    | 79.7                                    | 51.6                                    | 92.5                                    |
| [Me <sup>1</sup> (Al)] <sup>-</sup>                                                                                                                                                                 | 20.8                                    | 20.9                                    | 68.8                                    | 35.6                                    | 76.2                                    |
| [R <sup>1</sup> ] <sup>-</sup> or [Me <sup>1</sup> (Al)] <sup>-</sup> + CO <sub>2</sub> → [R <sup>1*</sup> -CO <sub>2</sub> ] <sup>-</sup> or [Me <sup>1</sup> (Al)*-CO <sub>2</sub> ] <sup>-</sup> |                                         |                                         |                                         |                                         |                                         |
|                                                                                                                                                                                                     | $\Delta_r E_{\text{gasphase}}$          | $\Delta_r H_{\text{gasphase}}$          | $\Delta_r G_{\text{gasphase}}$          | $\Delta_r H_{\text{solution}}$          | $\Delta_r G_{\text{solution}}$          |
| [Me <sup>1</sup> ] <sup>-</sup>                                                                                                                                                                     | -39.2                                   | -34.1                                   | 20.1                                    | -46.0                                   | 5.9                                     |
| [Et <sup>1</sup> ] <sup>-</sup>                                                                                                                                                                     | -32.7                                   | -28.7                                   | 25.9                                    | -33.8                                   | 17.8                                    |
| [Me <sup>1</sup> (Al)] <sup>-</sup>                                                                                                                                                                 | -68.2                                   | -62.9                                   | -8.7                                    | -74.9                                   | -23.1                                   |

### Reactivity after protonation

The reactivity of [Me<sup>1</sup>]<sup>-</sup> after protonation (to give [H-Me<sup>1\*</sup>]) was studied (Figure S9). An energetically low-lying transition state (**TS-1**) accounting for the cleavage of the exopyrrolic C-C bond originating from the proton-bearing carbon atom was found. The subsequently obtained intermediate (**Int-1**) is essentially Gibbs free isoenergetic with [H-Me<sup>1\*</sup>].

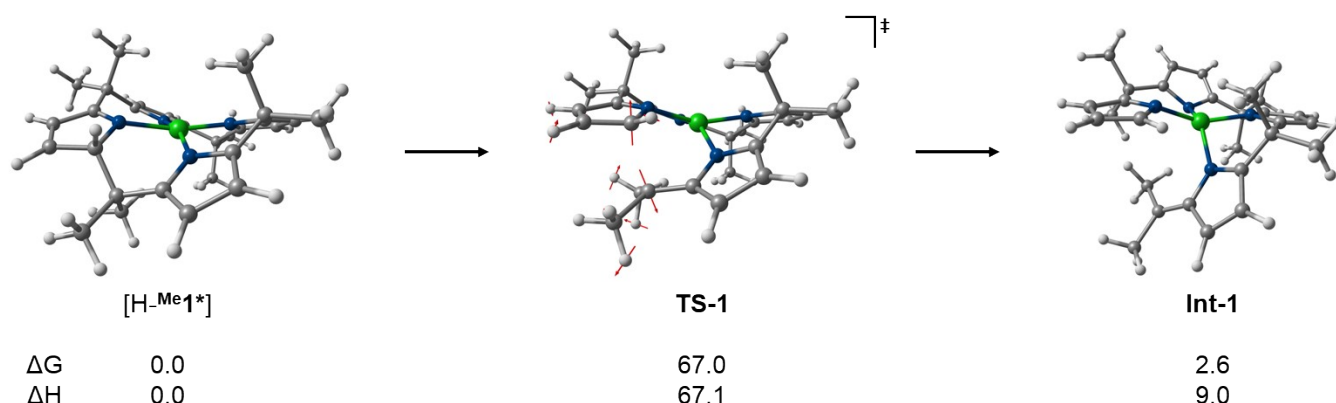

**Figure S9.** Reactivity of [H-Me<sup>1\*</sup>] as suggested by calculations on the RI-DSD-PBEP86/2013-D3(BJ)/def2-QZVPP//r<sup>2</sup>SCAN-3c, COSMO-RS(CH<sub>2</sub>Cl<sub>2</sub>) level of theory. All numbers are given in kJ mol<sup>-1</sup>. The scaled displacement vectors illustrating the single imaginary mode of **TS-1** are shown in red.

The obtained results were then compared to calculations which included THF donor molecules explicitly coordinating to the gallium center (Figure S10). THF coordinating *syn* to the dearomatization-inducing proton was found energetically more favorable than *anti* coordination. The association of a second THF donor was calculated endergonic by 18 kJ mol<sup>-1</sup>. The transition state searches for the C-C bond cleavage based on [H-Me<sup>1\*</sup>-thf]<sub>syn</sub> and [H-Me<sup>1\*</sup>-(thf)<sub>2</sub>] as preceding intermediates remained unsuccessful. The transition structure optimizations did not converge. Only with THF coordinating *anti* to the proton resulted in a successful optimization (**TS-2**). Comparing [H-Me<sup>1\*</sup>-thf]<sub>syn</sub> and **TS-2** gives a Gibbs free energy difference of 131 kJ mol<sup>-1</sup>.

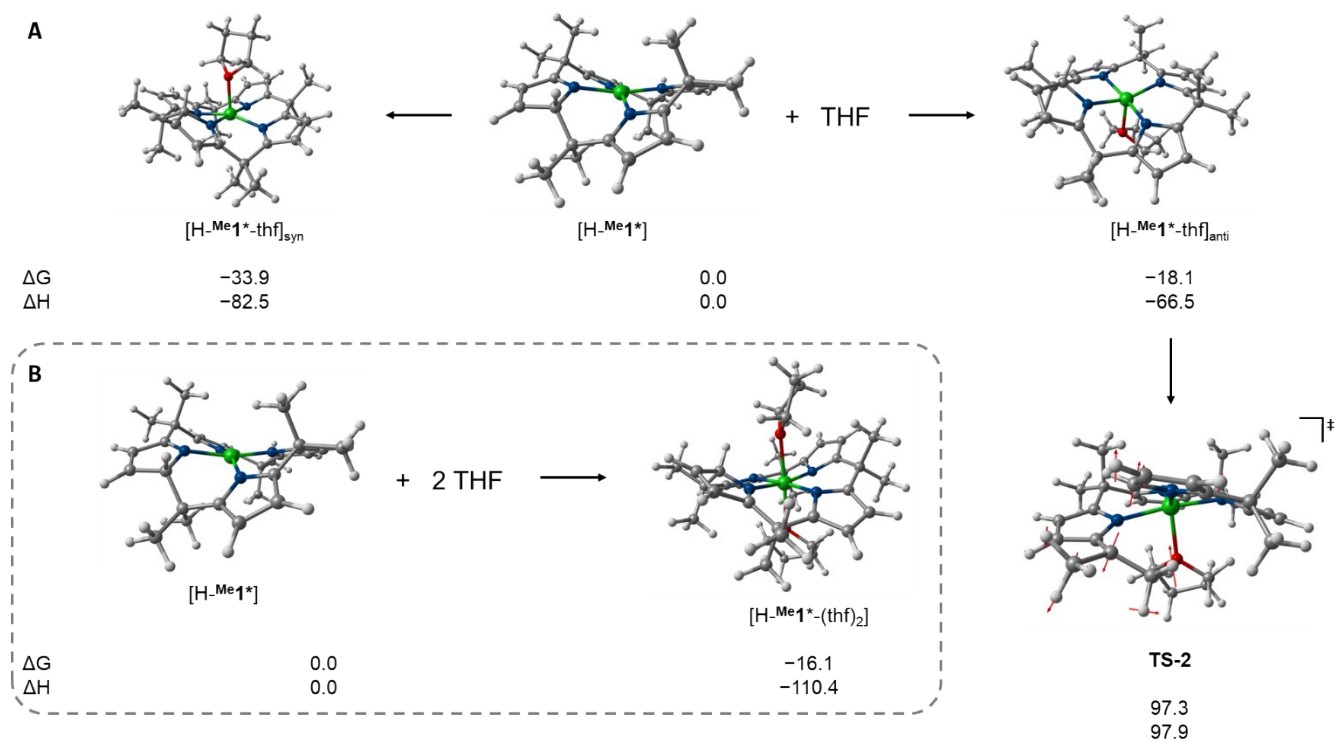

**Figure S10.** Reactivity of  $[\text{H-Me1*}]$  in the presence of THF as donor as suggested by calculations on the RI-DSD-PBEP86/2013-D3(BJ)/def2-QZVPP//r<sup>2</sup>SCAN-3c, COSMO-RS( $\text{CH}_2\text{Cl}_2$ ) level of theory. All numbers are given in  $\text{kJ mol}^{-1}$ . The scaled displacement vectors illustrating the single imaginary mode of **TS-2** are shown in red.

## S9. NMR spectra

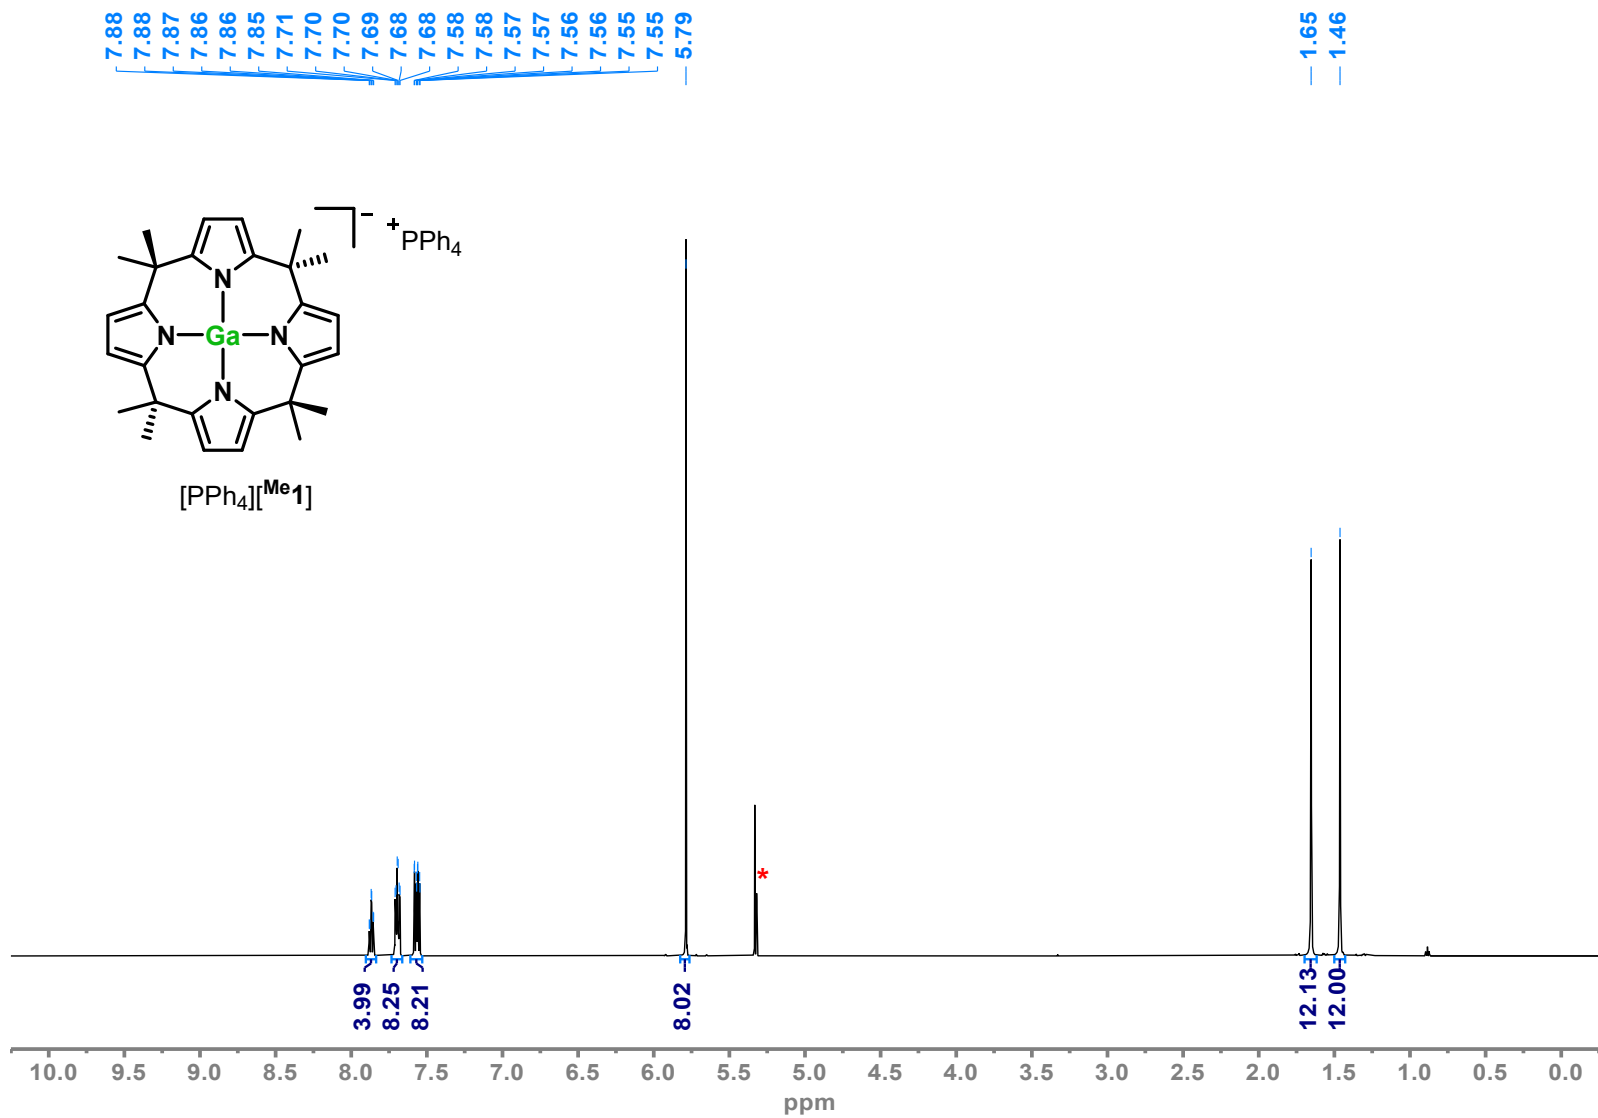

**Figure S11.** <sup>1</sup>H NMR spectrum (600.2 MHz, CD<sub>2</sub>Cl<sub>2</sub>, 295 K) of [PPh<sub>4</sub>][Me<sup>1</sup>]. The signal of CHDCl<sub>2</sub> and of residual CH<sub>2</sub>Cl<sub>2</sub> is marked with a red asterisk.

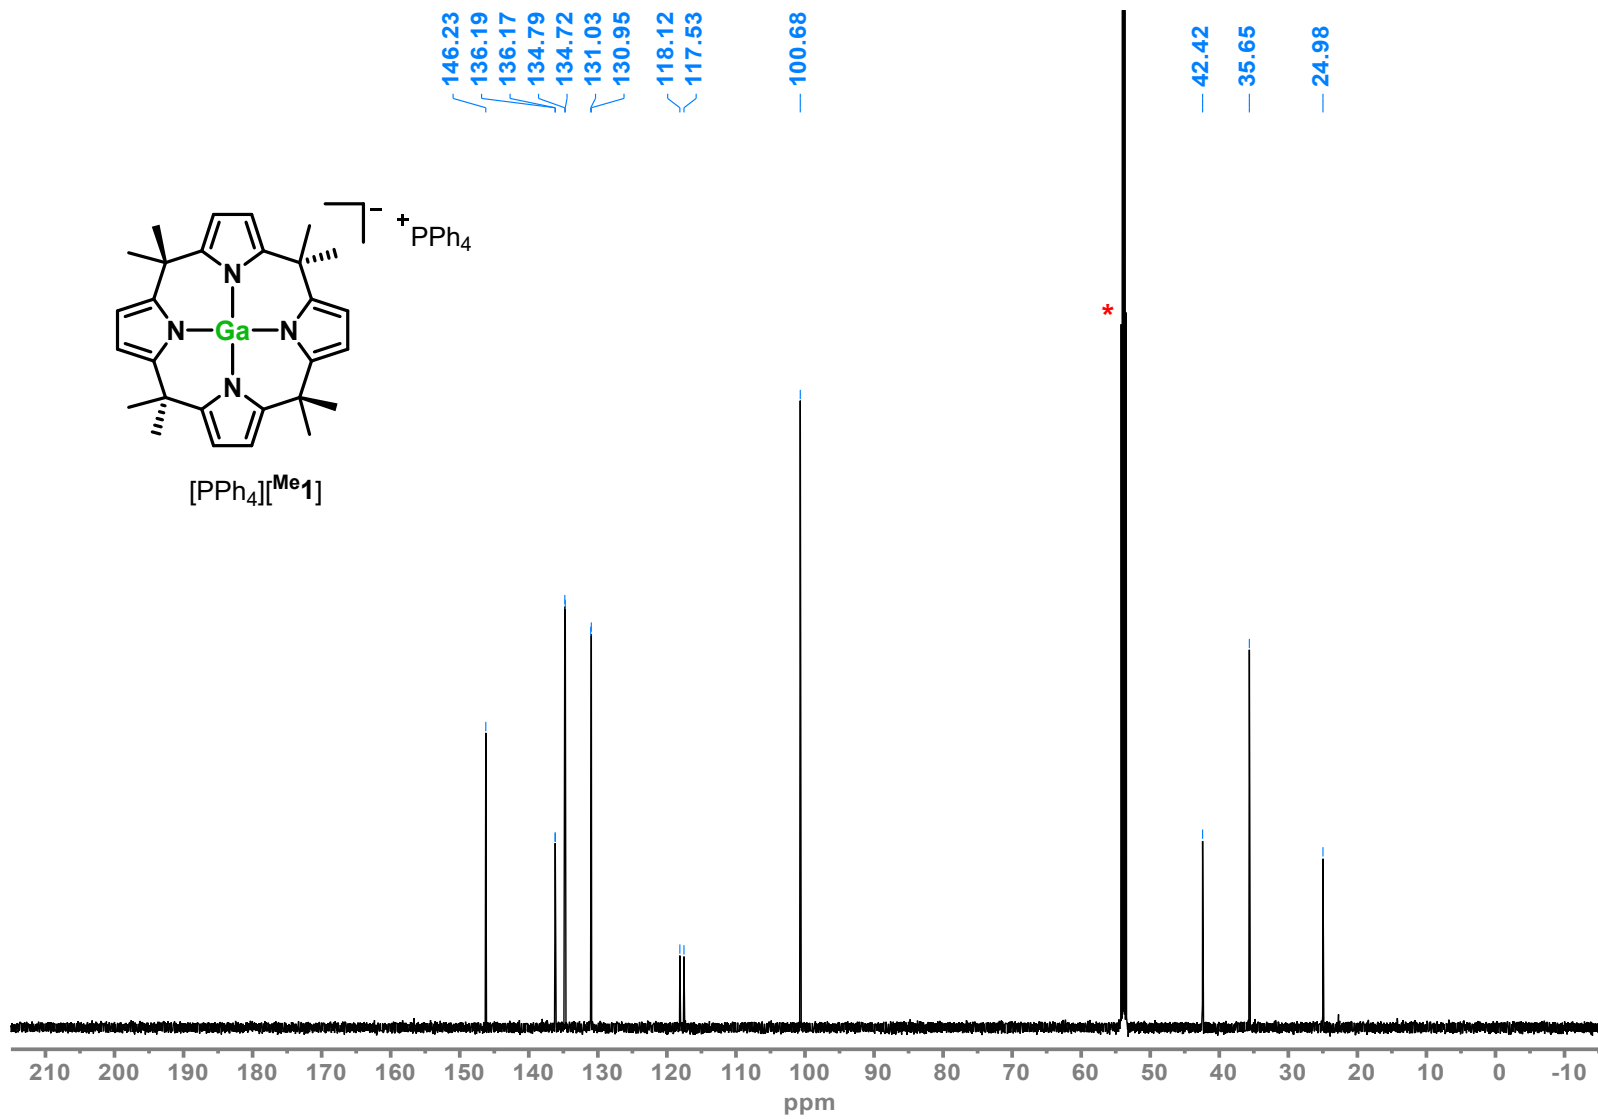

**Figure S12.** <sup>13</sup>C{<sup>1</sup>H} NMR spectrum (150.9 MHz, CD<sub>2</sub>Cl<sub>2</sub>, 295 K) of [PPh<sub>4</sub>][Me<sub>4</sub>]. The signal of CD<sub>2</sub>Cl<sub>2</sub> is marked with a red asterisk.



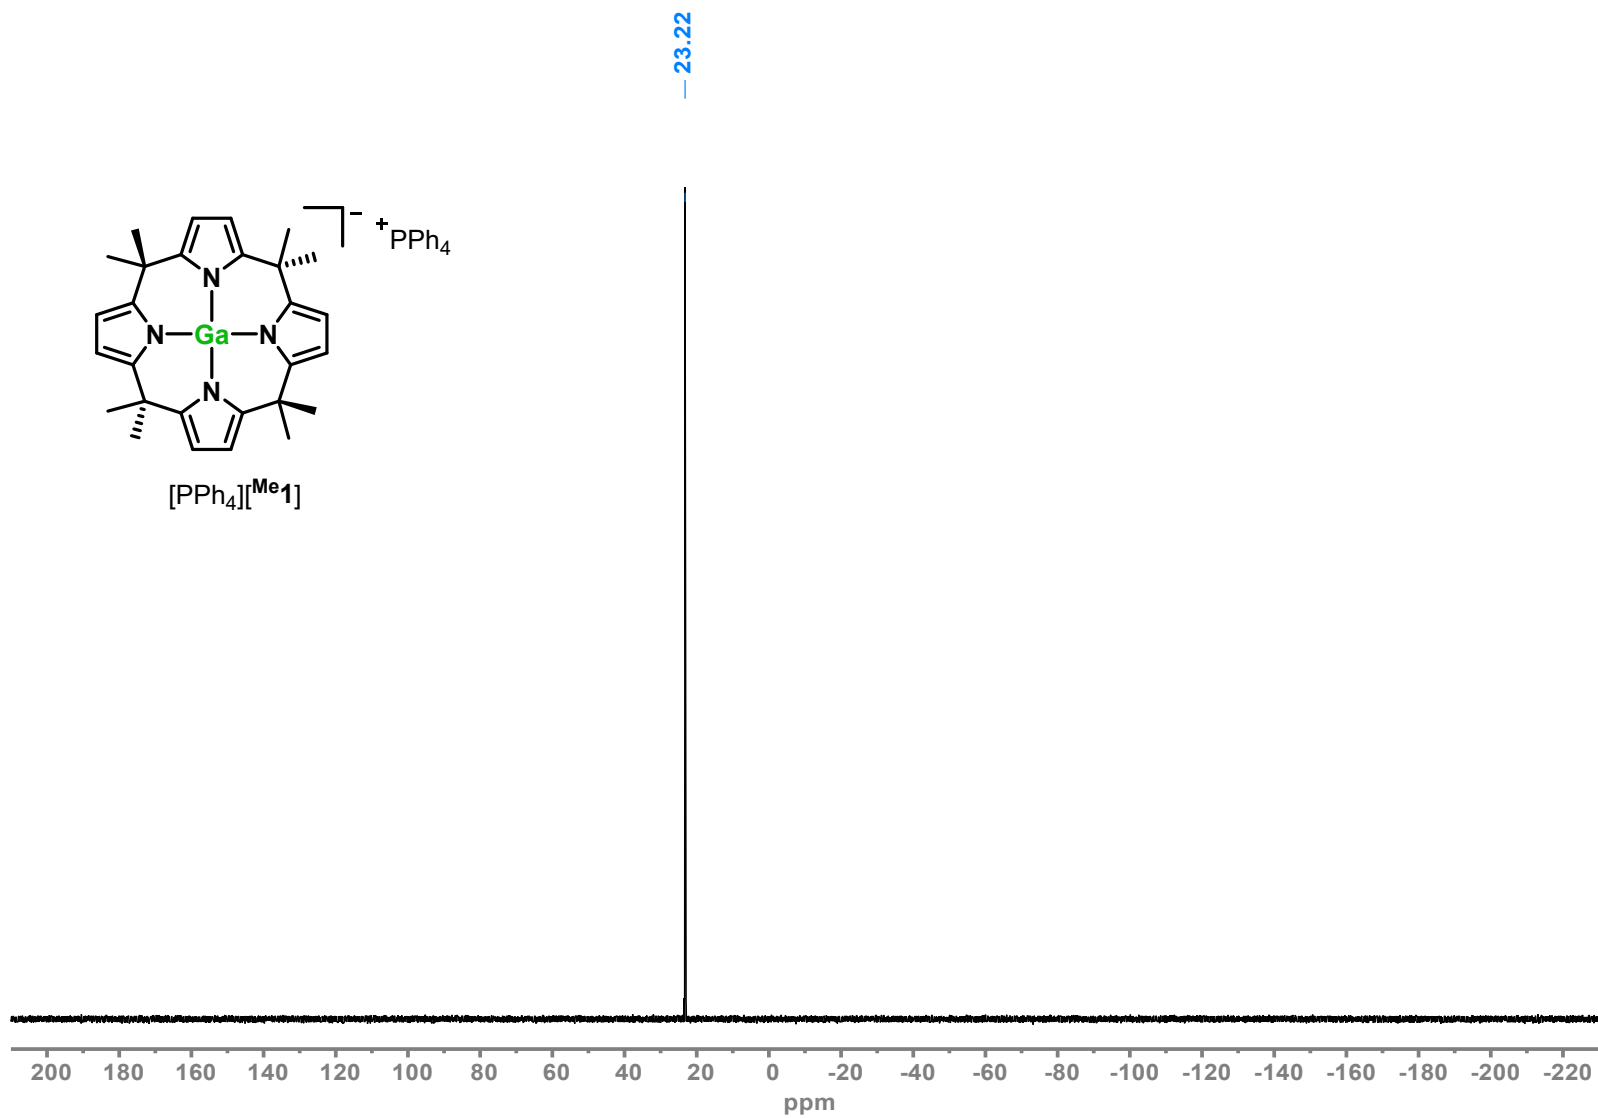

Figure S13. <sup>31</sup>P{<sup>1</sup>H} NMR spectrum (161.9 MHz, CD<sub>2</sub>Cl<sub>2</sub>, 295 K) of [PPh<sub>4</sub>][Me<sup>1</sup>].

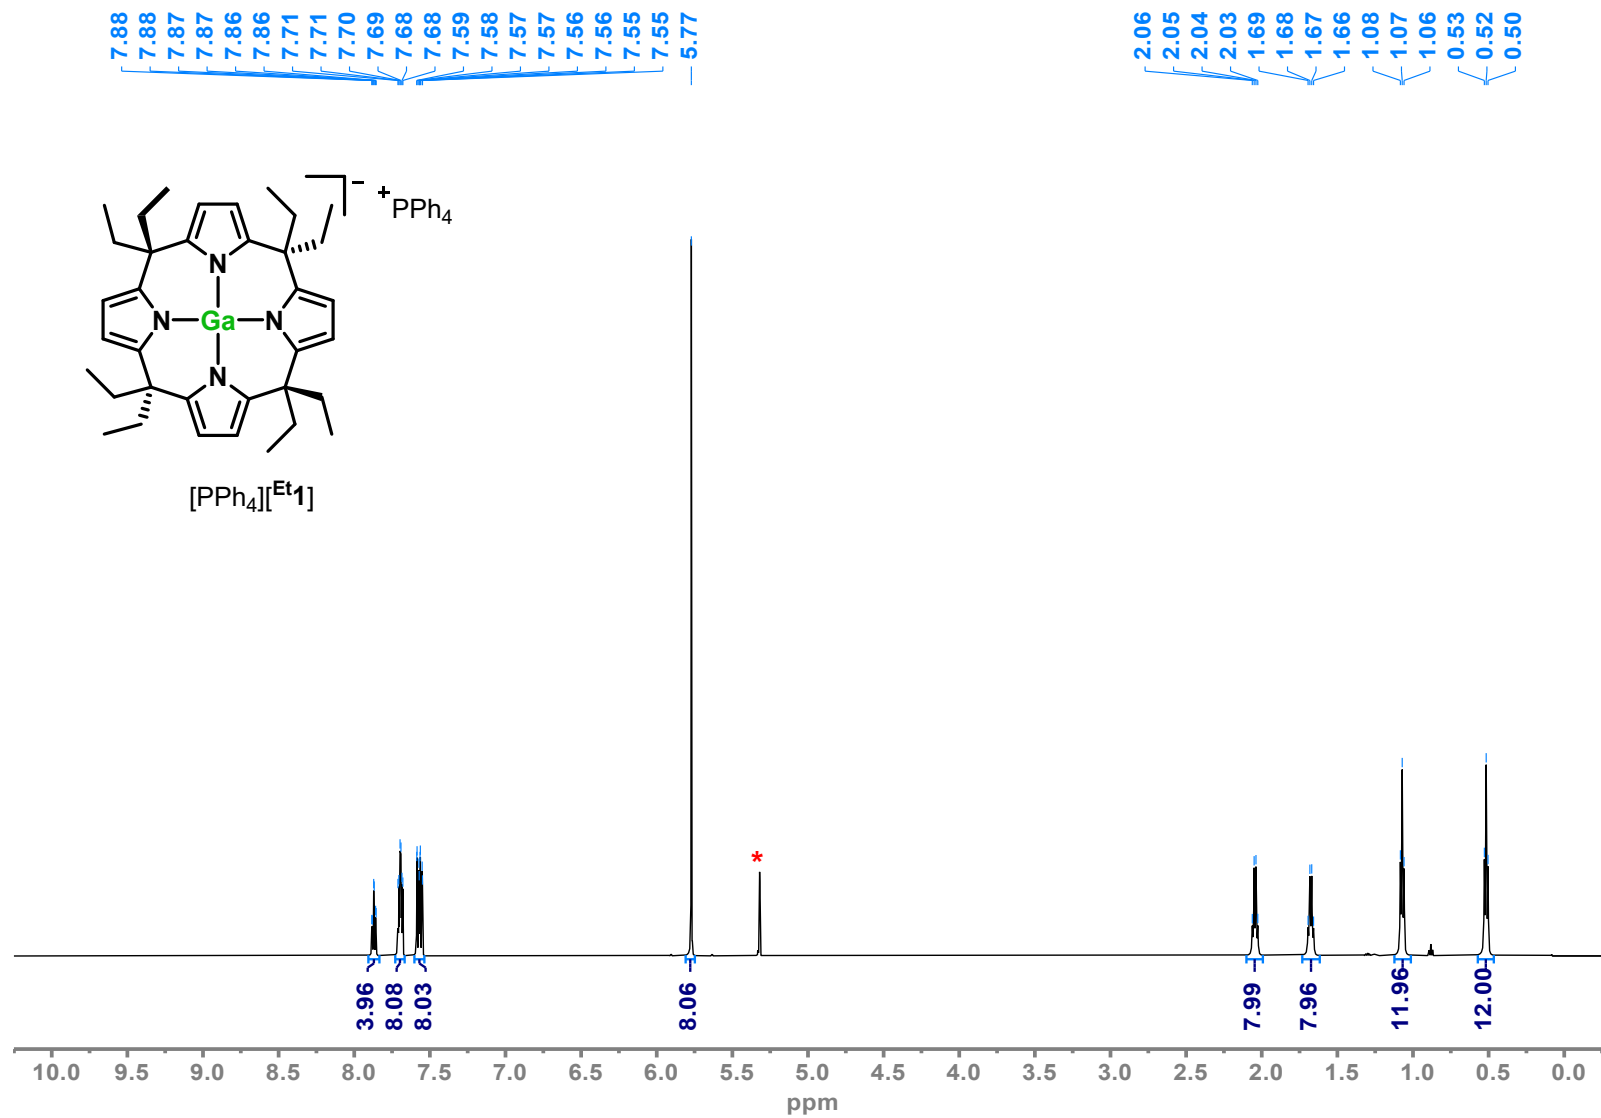

**Figure S14.**  $^1H$  NMR spectrum (600.2 MHz,  $CD_2Cl_2$ , 295 K) of  $[PPh_4][Et1]$ . The signal of  $CH_2Cl_2$  is marked with a red asterisk.

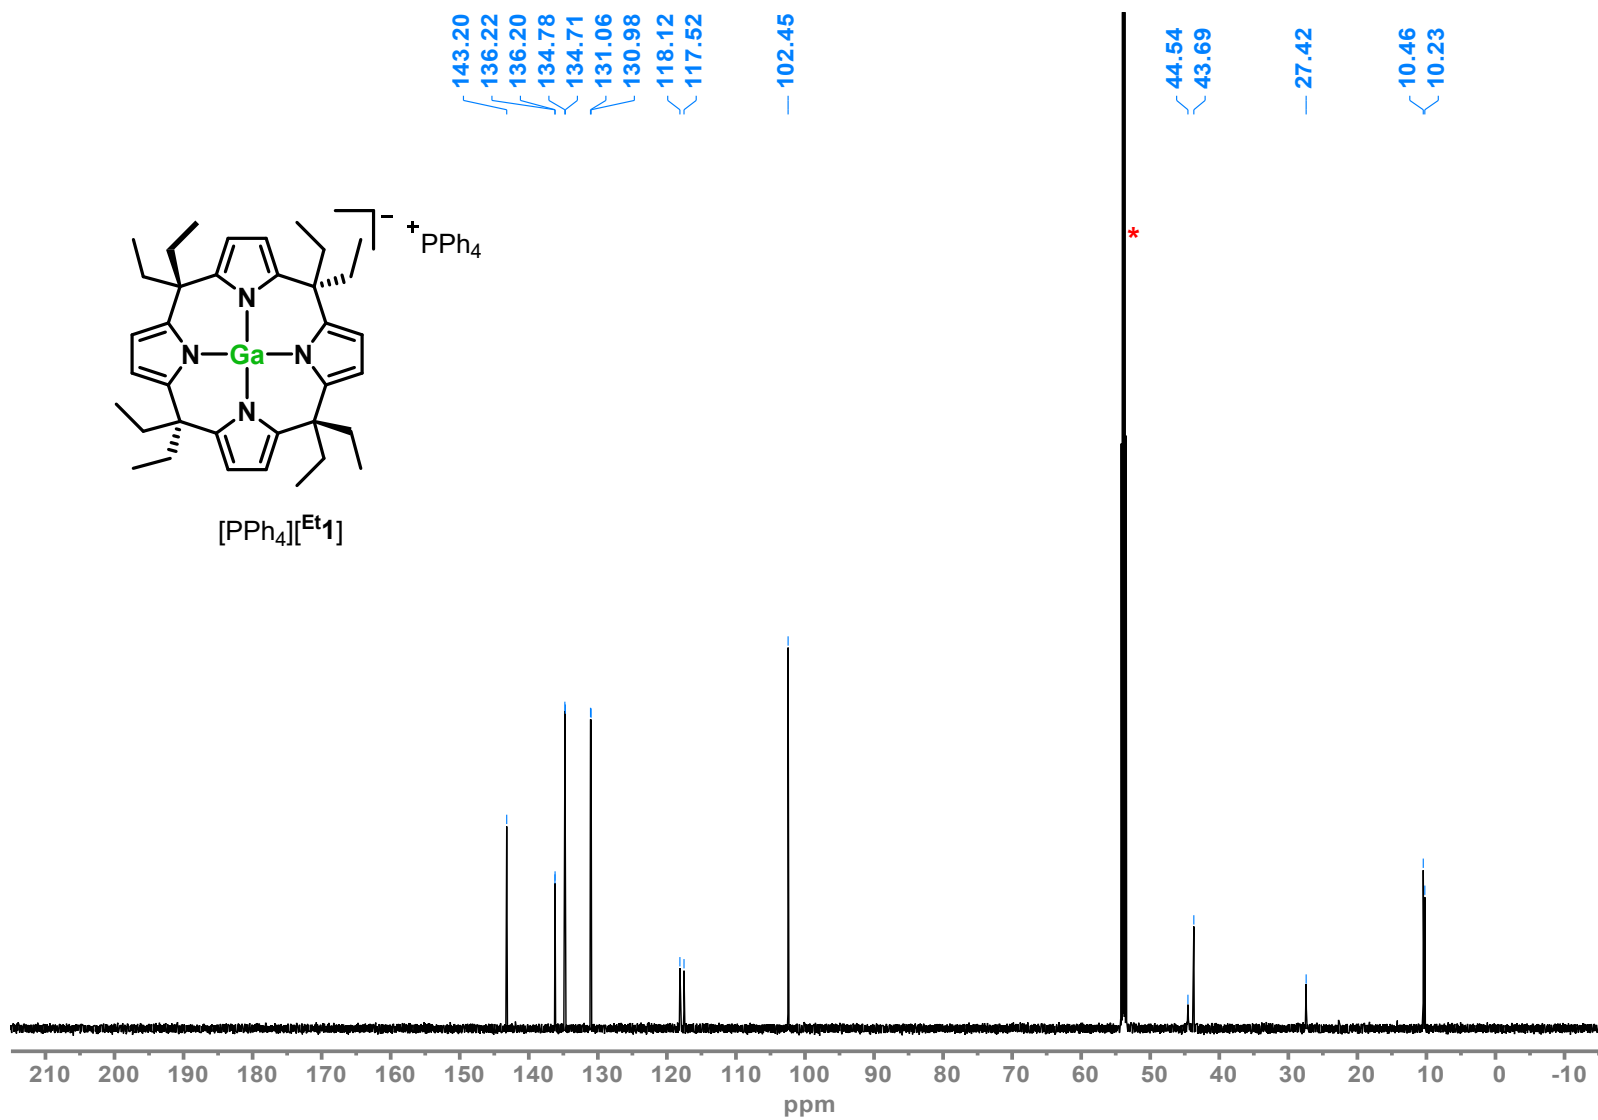

Figure S15. <sup>13</sup>C{<sup>1</sup>H} NMR spectrum (150.9 MHz, CD<sub>2</sub>Cl<sub>2</sub>, 295 K) of [PPh<sub>4</sub>][Et<sup>1</sup>]. The signal of CD<sub>2</sub>Cl<sub>2</sub> is marked with a red asterisk.

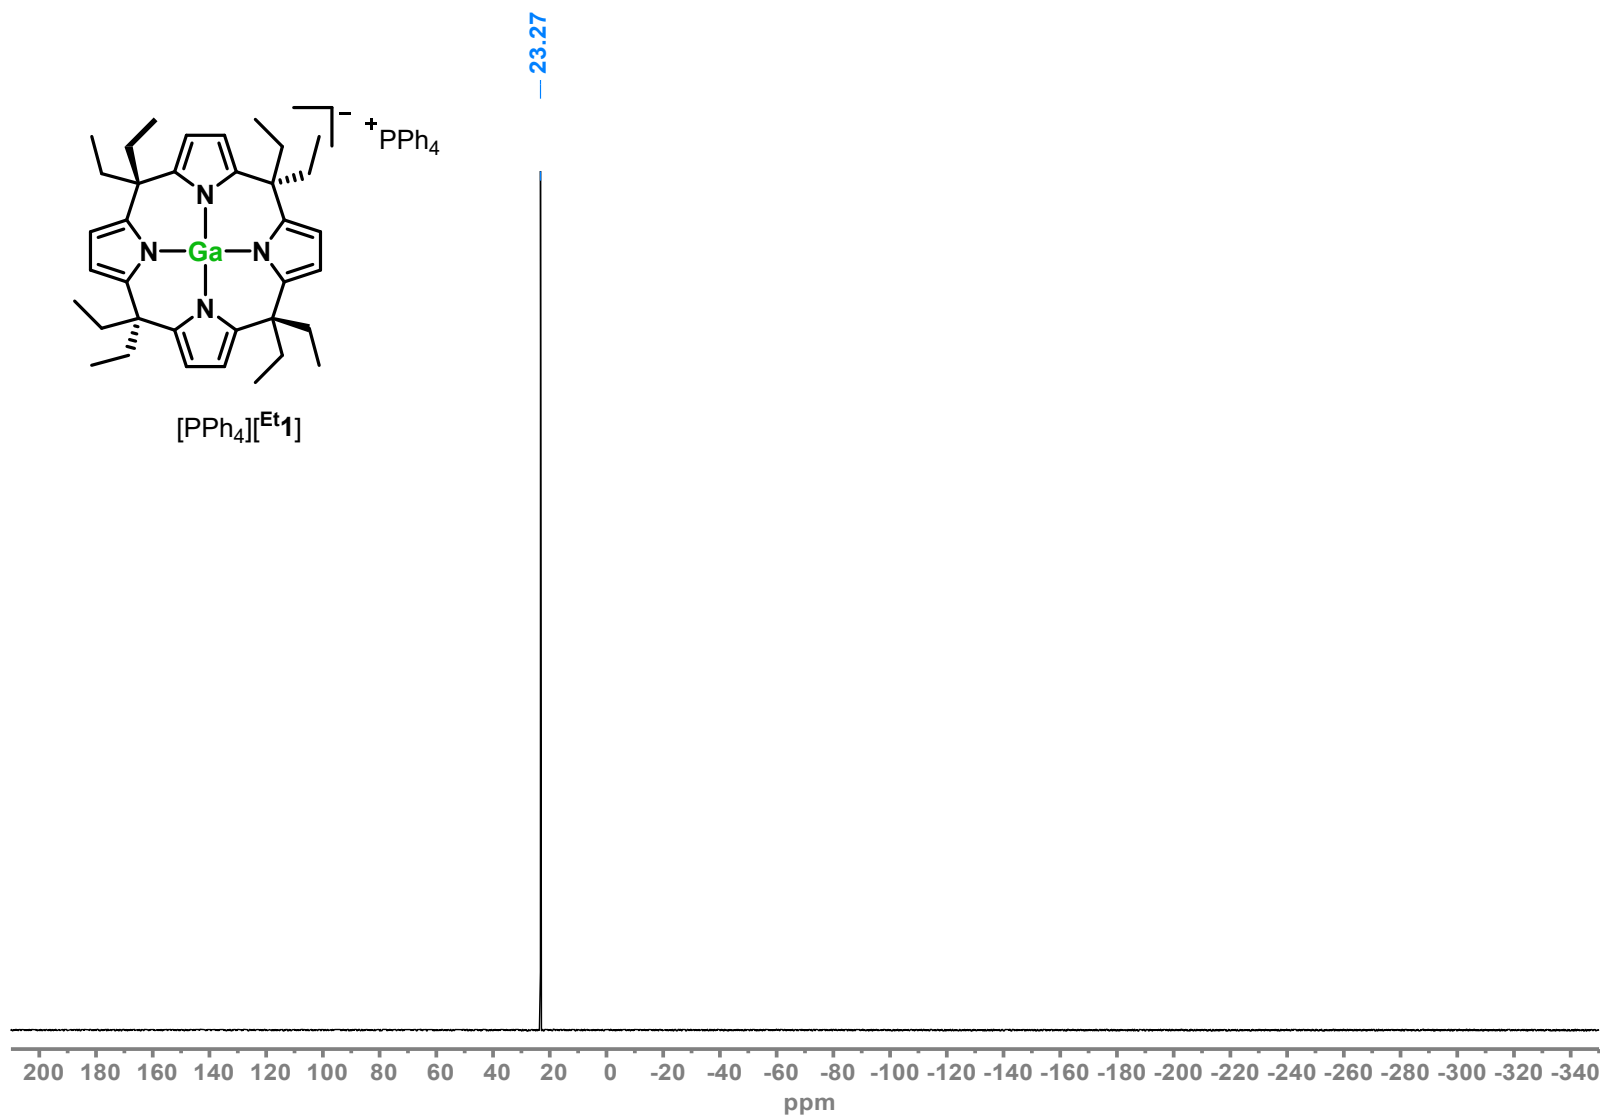

Figure S16. <sup>31</sup>P{<sup>1</sup>H} NMR spectrum (243.0 MHz, CD<sub>2</sub>Cl<sub>2</sub>, 295 K) of [PPh<sub>4</sub>][E1].

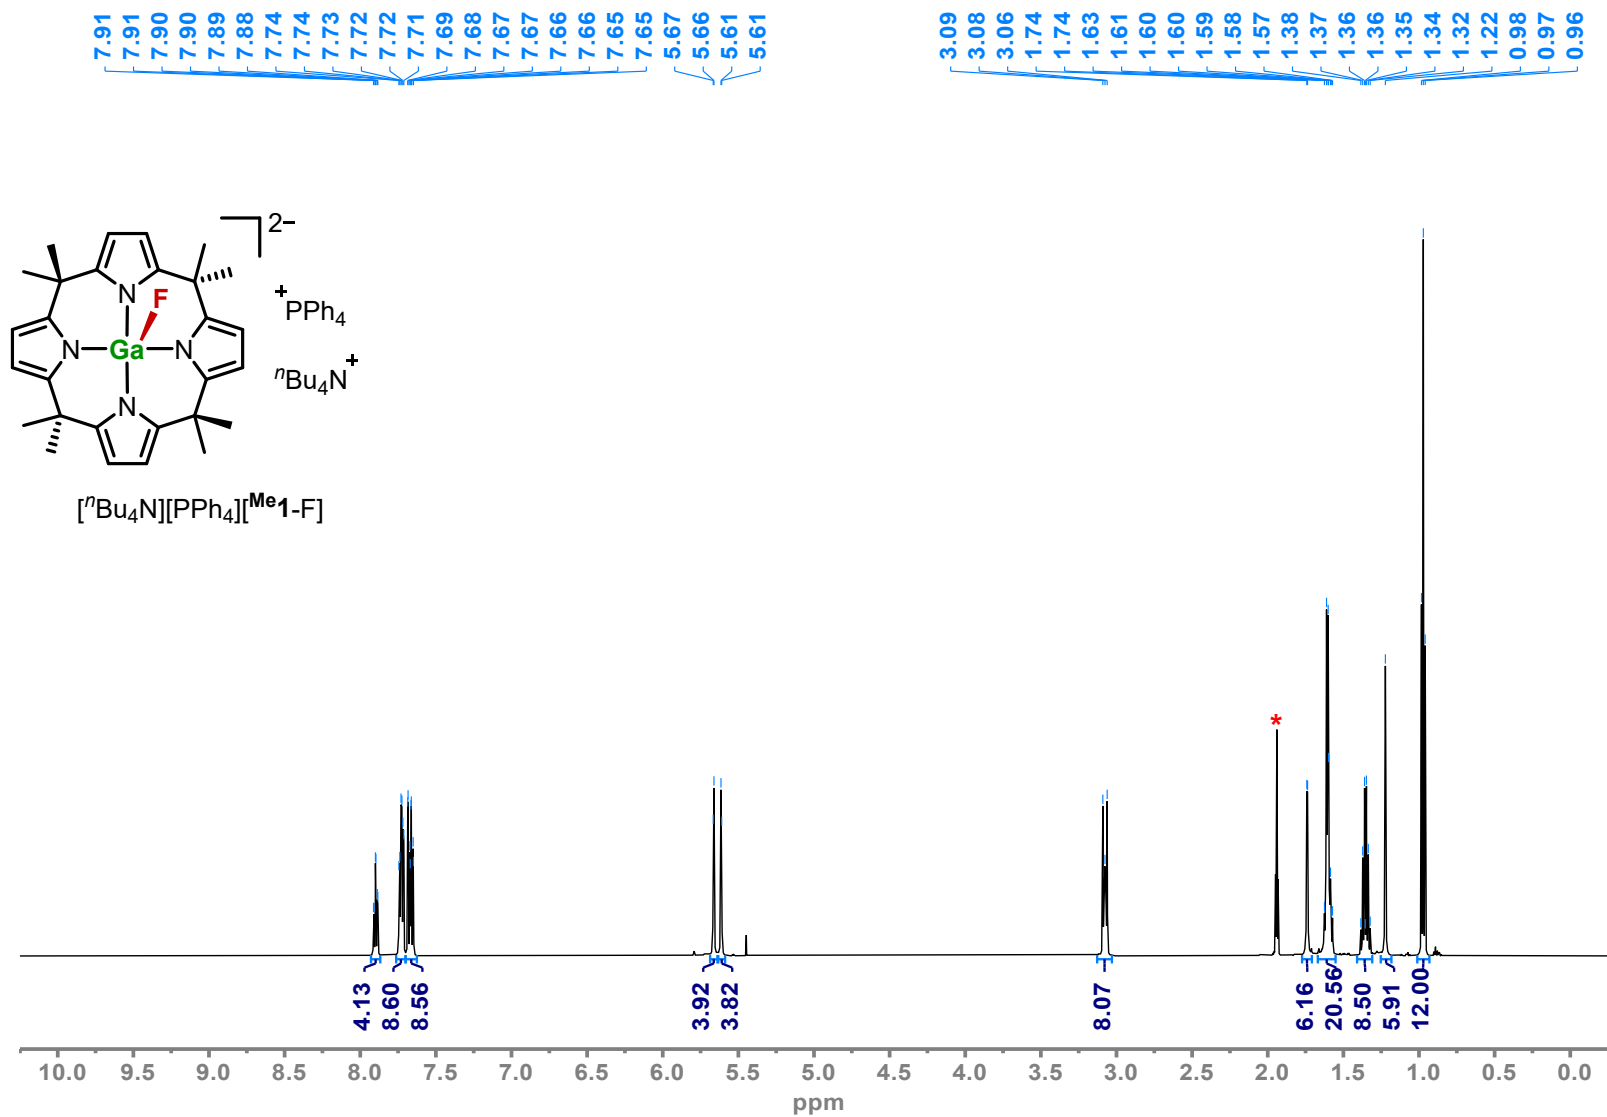

**Figure S17.**  $^1\text{H}$  NMR spectrum (600.2 MHz,  $\text{CD}_3\text{CN}$ , 295 K) of  $[^n\text{Bu}_4\text{N}][\text{PPh}_4][^{\text{Me}1}\text{-F}]$ . The signal of  $\text{CHD}_2\text{CN}$  is marked with a red asterisk. The small singlet at 5.47 corresponds to a slight residual amount of  $\text{CH}_2\text{Cl}_2$ .

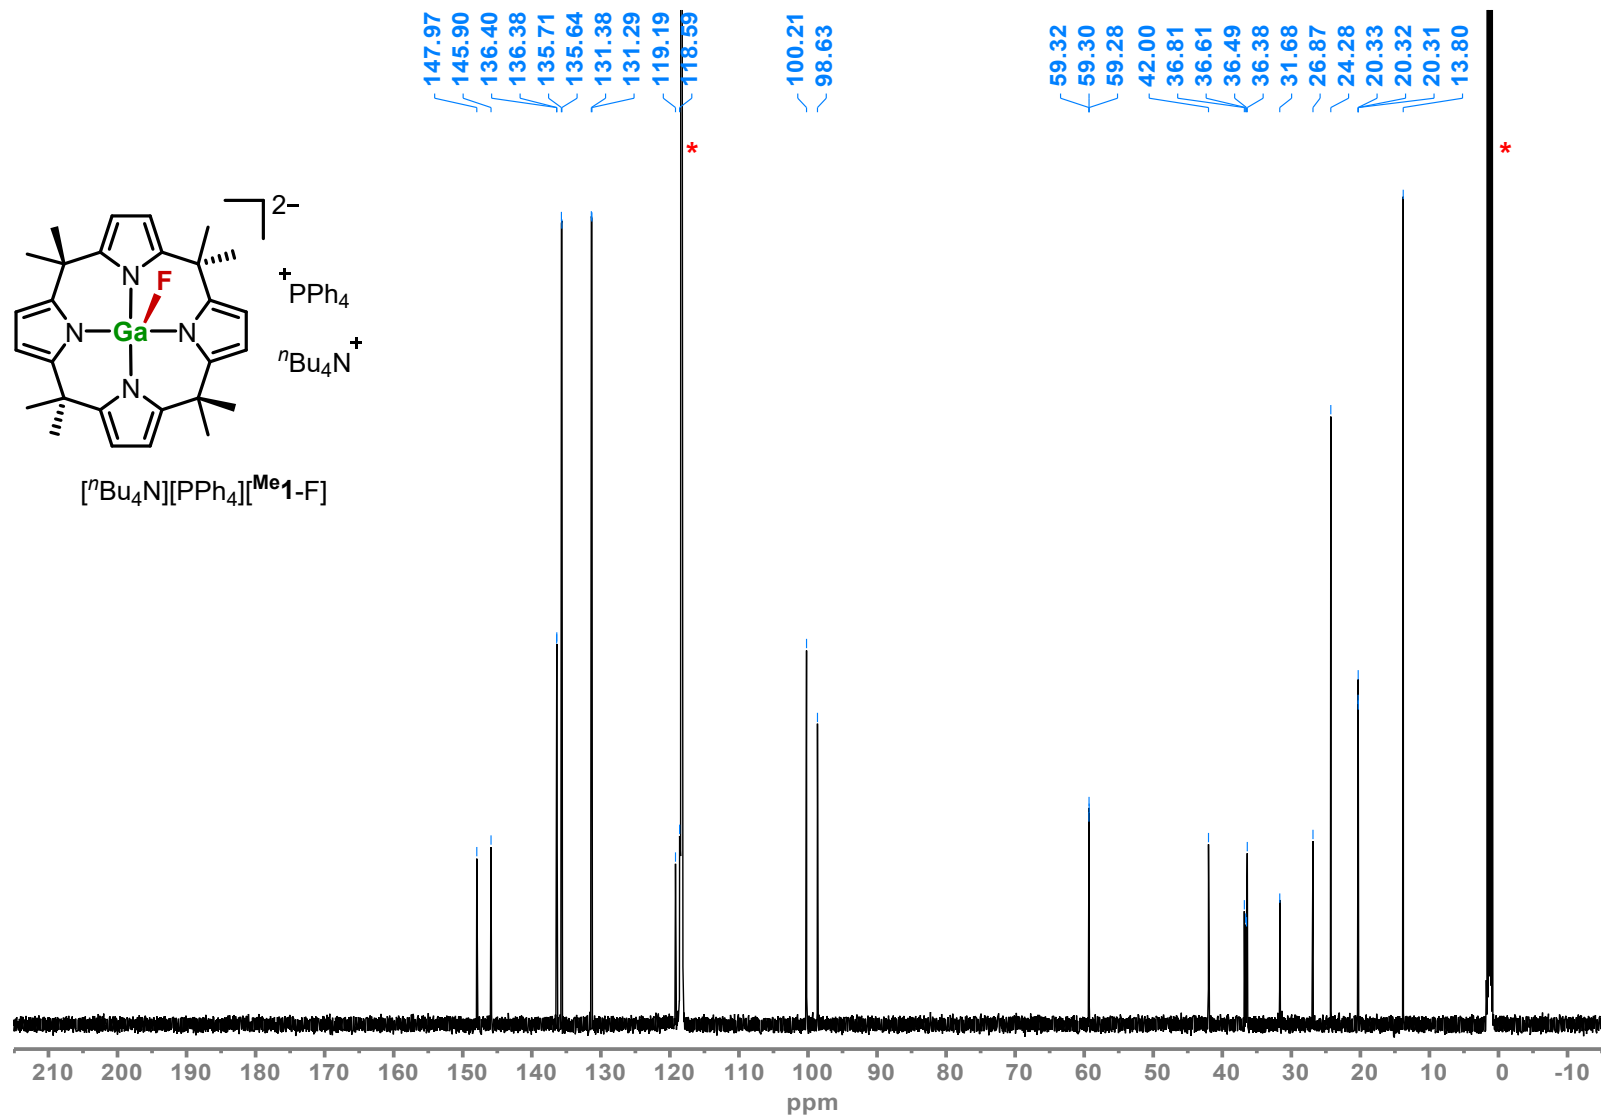

**Figure S18.**  $^{13}\text{C}$  NMR spectrum (150.9 MHz,  $\text{CD}_3\text{CN}$ , 295 K) of  $[\text{nBu}_4\text{N}][\text{PPh}_4][\text{Me}^1\text{-F}]$ . The signals of  $\text{CD}_3\text{CN}$  are marked with red asterisks.

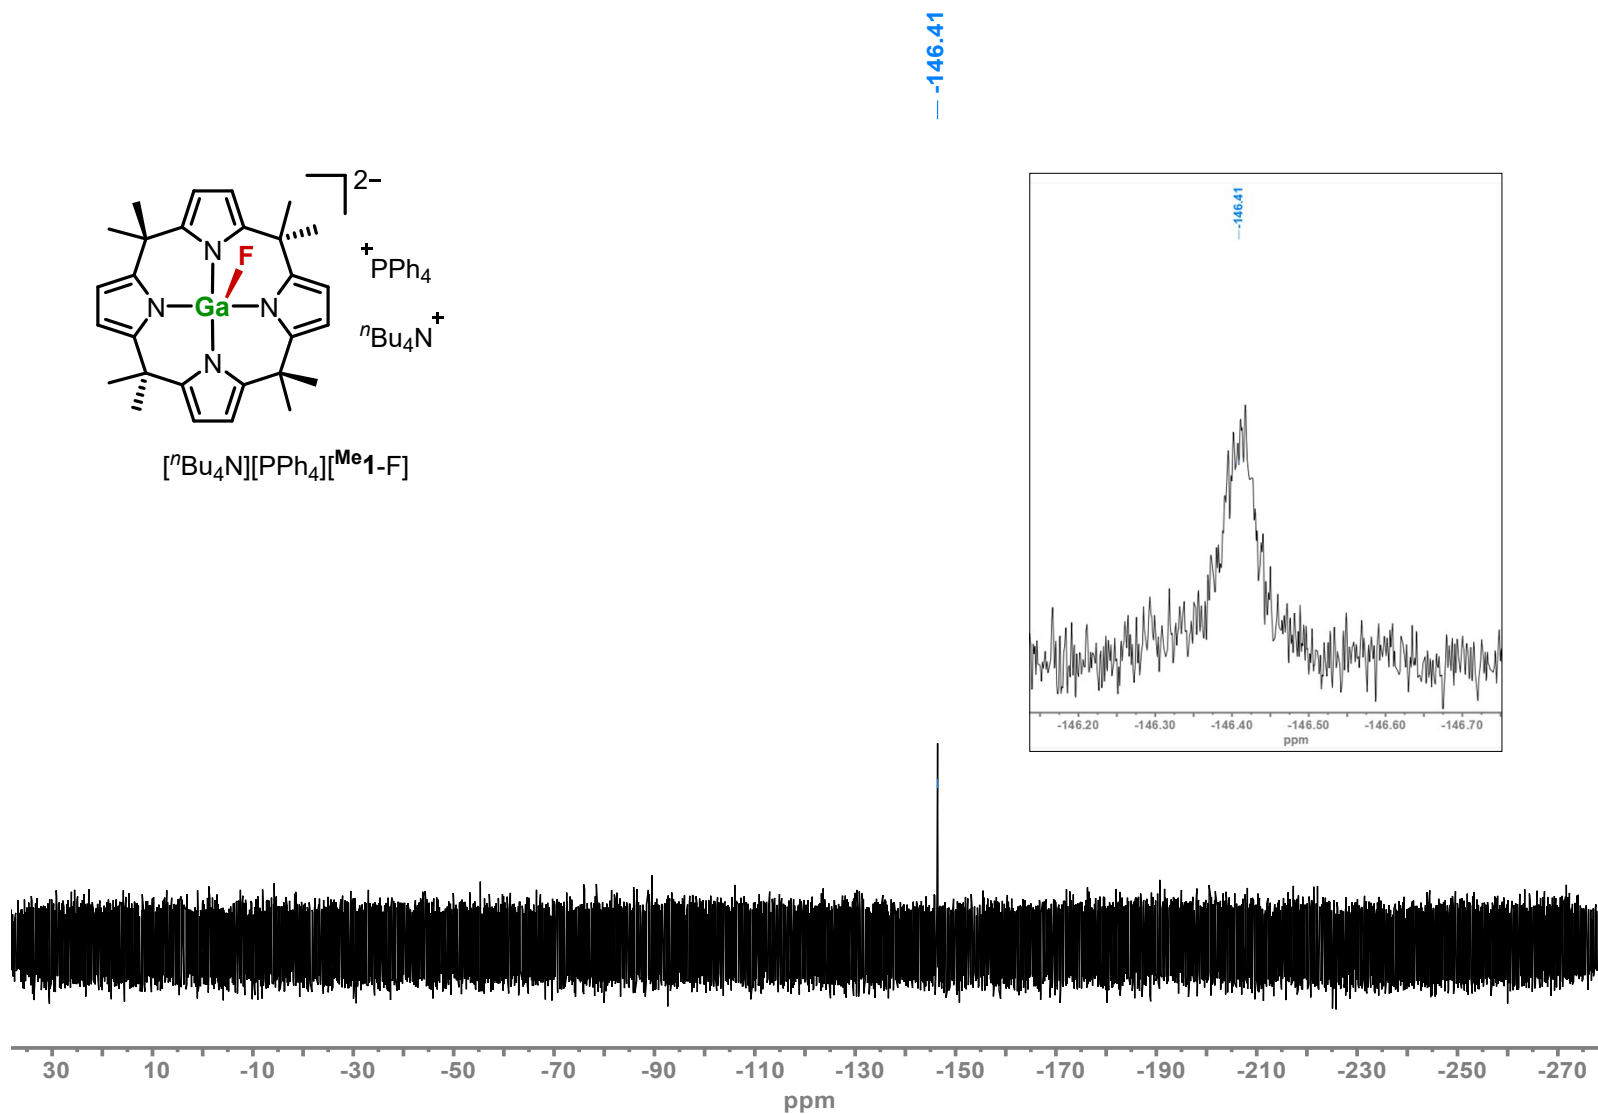

Figure S19.  $^{19}\text{F}$  NMR spectrum (376.3 MHz,  $\text{CD}_3\text{CN}$ , 295 K) of  $[\text{nBu}_4\text{N}][\text{PPh}_4][\text{Me}^1\text{-F}]$ .

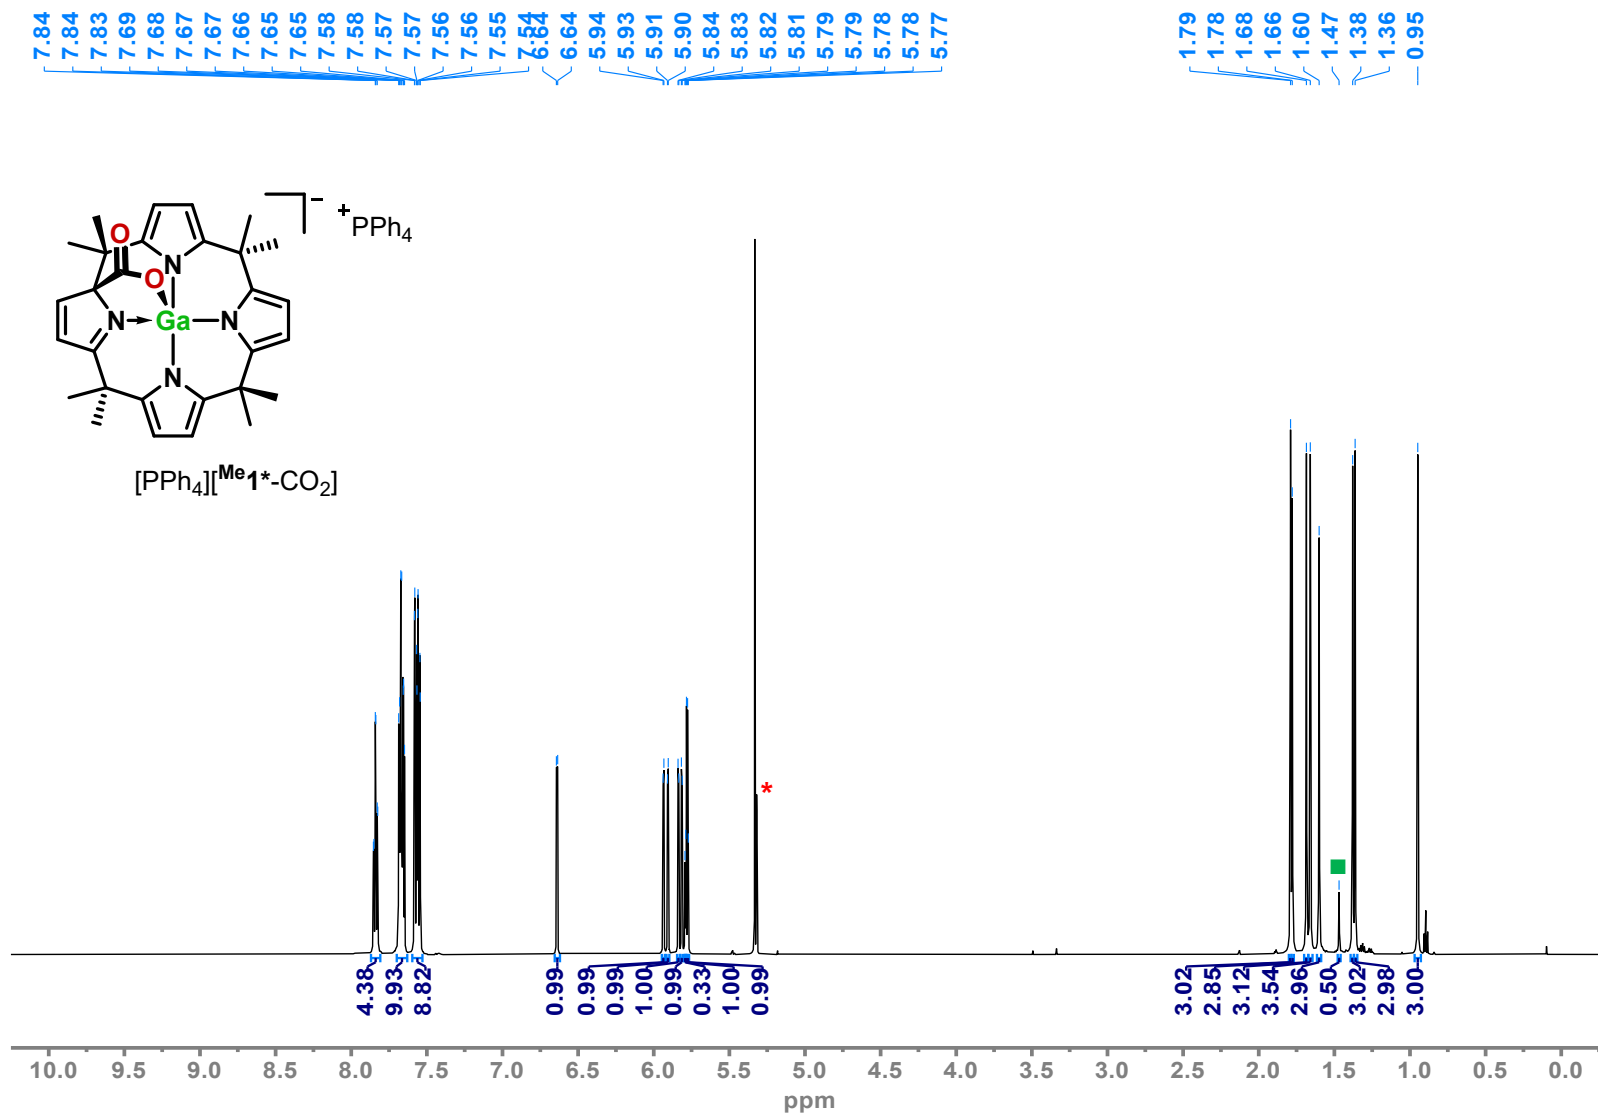

**Figure S20.**  $^1H$  NMR spectrum (600.2 MHz,  $CD_2Cl_2$ , 295 K) of  $[PPh_4][Me_1^*]$  in the presence of  $CO_2$  (5 bar). One well visible signal of free  $[Me_1^*]^-$  is marked with a green square. The ratio between  $[Me_1^*]^-$  and  $[Me_1^*-CO_2]^-$  was determined to 1:24 using this resonance. The signal of  $CH_2Cl_2$  and residual  $CH_2Cl_2$  is marked with a red asterisk.



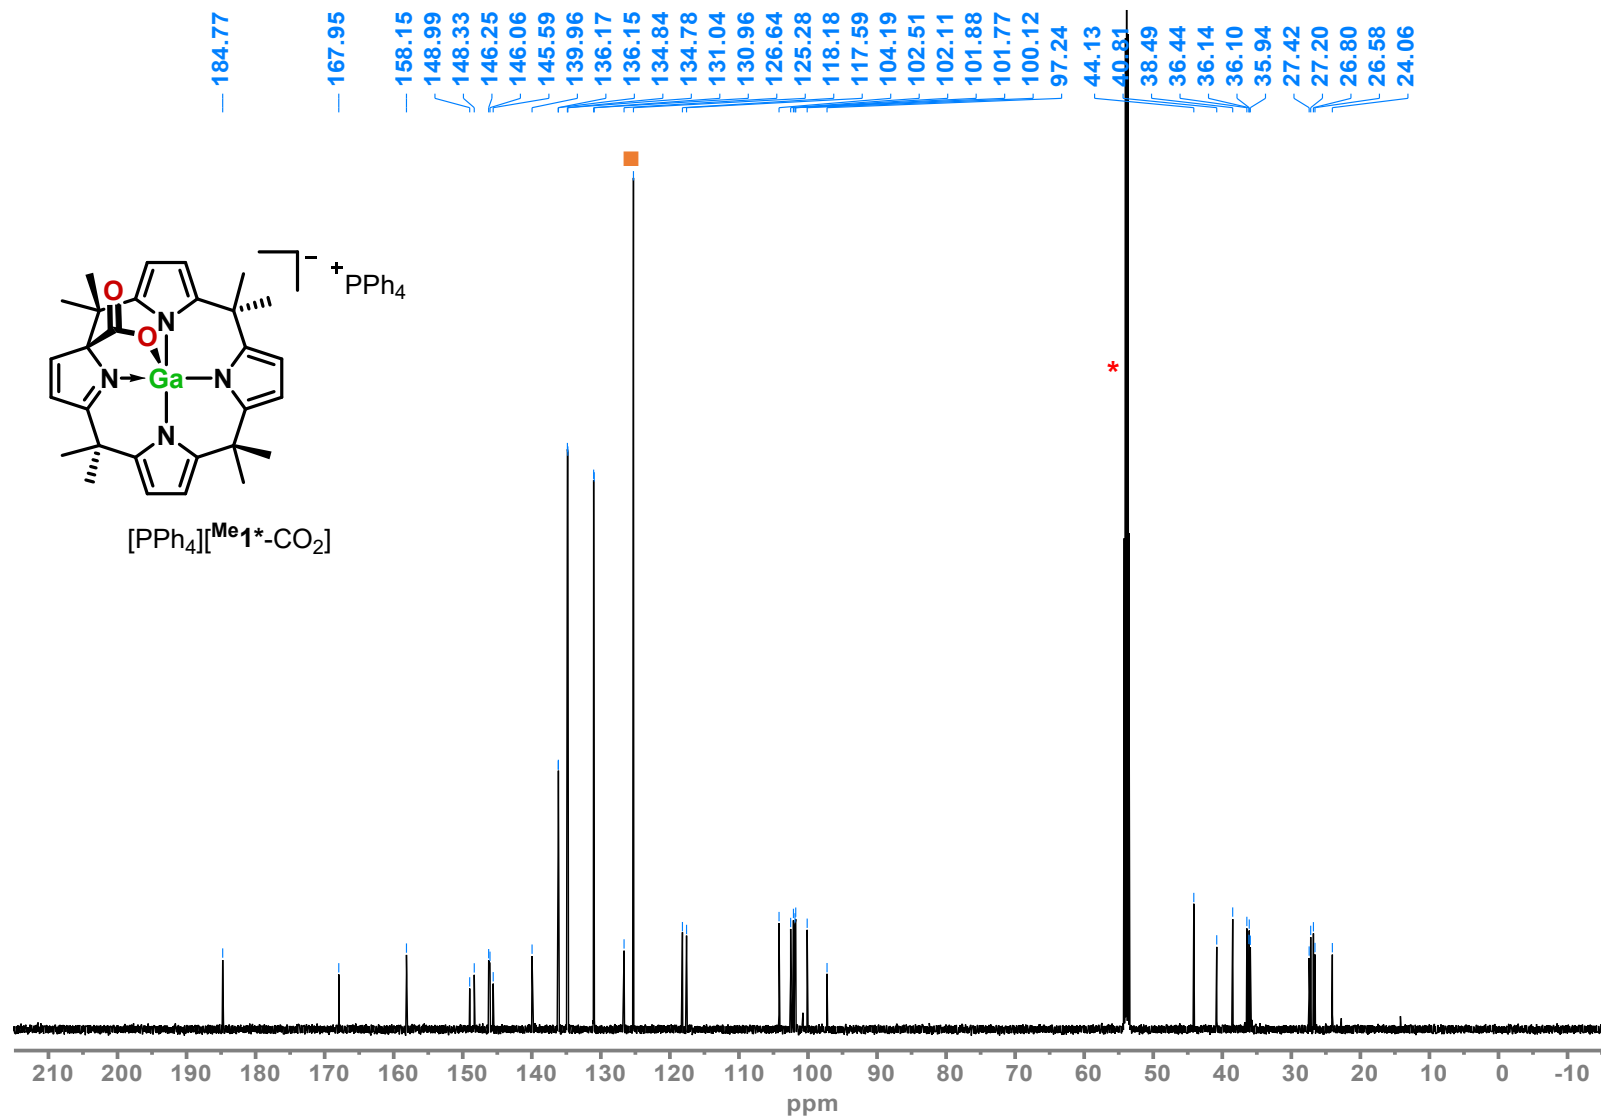

**Figure S21.**  $^{13}\text{C}\{^1\text{H}\}$  NMR spectrum (150.9 MHz,  $\text{CD}_2\text{Cl}_2$ , 295 K) of  $[\text{PPh}_4][\text{Me}^1]$  in the presence of  $\text{CO}_2$  (5 bar). The signal of  $\text{CD}_2\text{Cl}_2$  is marked with a red asterisk, that of free  $\text{CO}_2$  with an orange square.

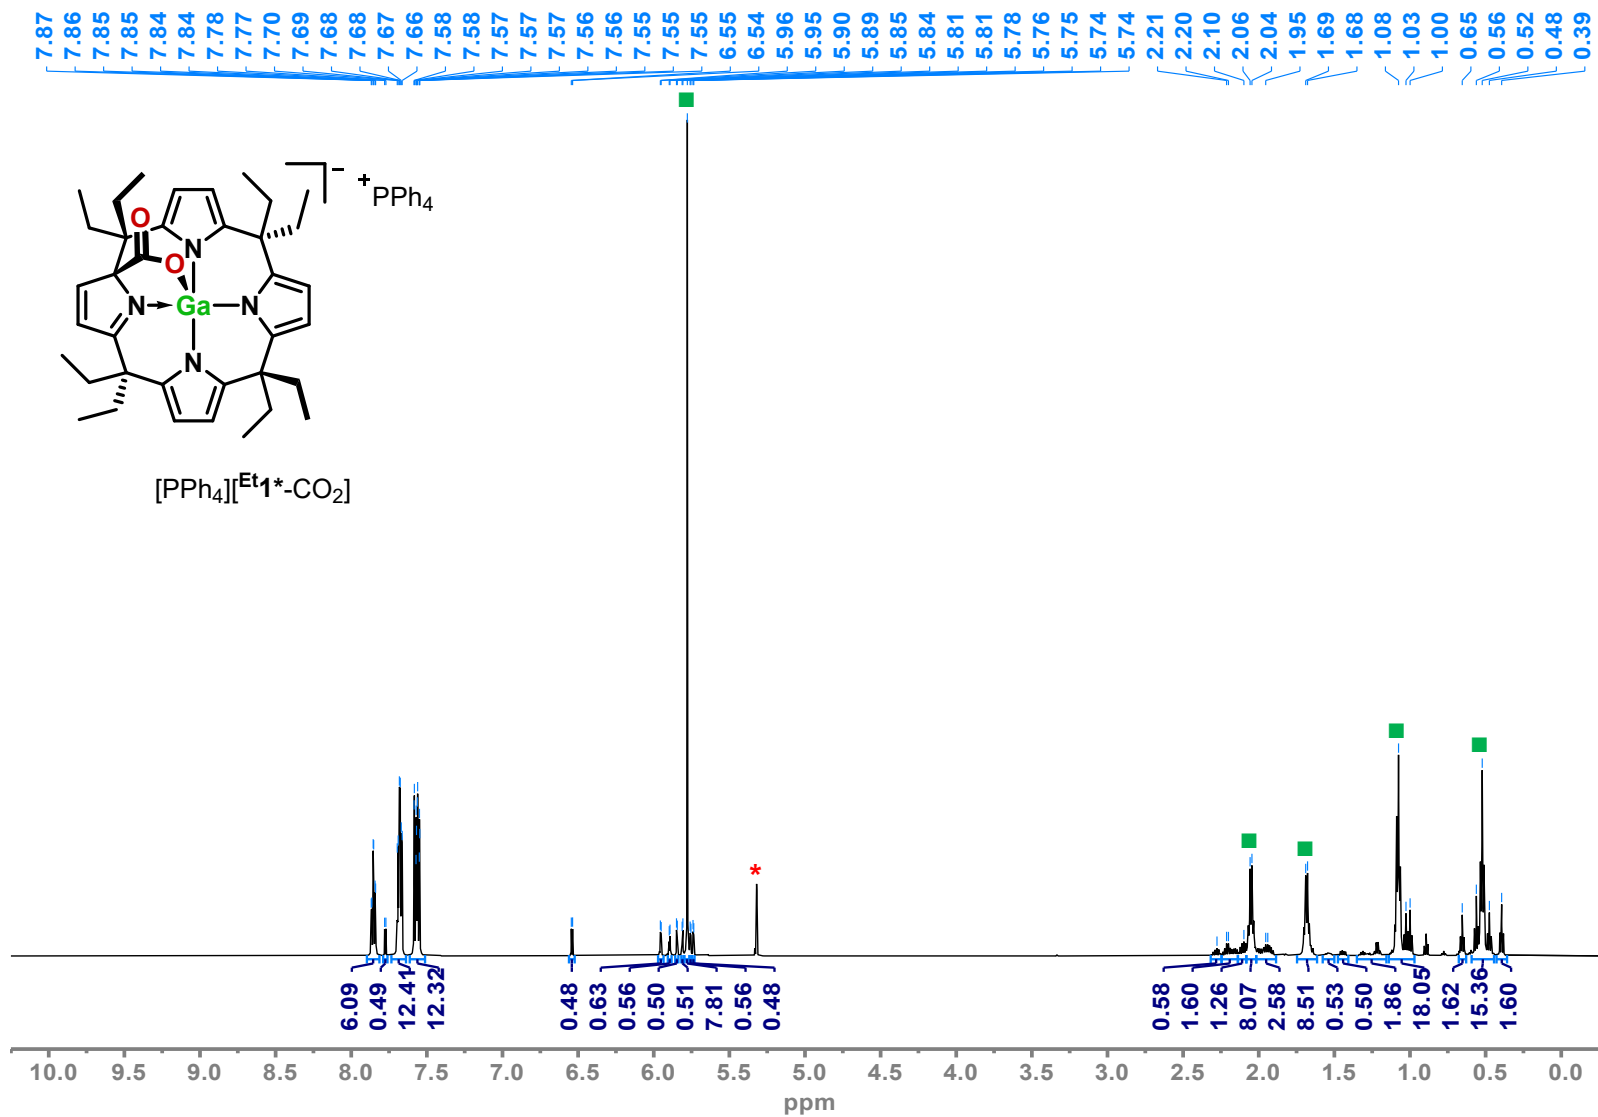

**Figure S22.**  $^1H$  NMR spectrum (600.2 MHz,  $CD_2Cl_2$ , 295 K) of  $[PPh_4][Et1^*]$  in the presence of  $CO_2$  (5 bar). The signals of free  $[Et1^*]^-$  are marked with green squares. The ratio between  $[Et1^*]^-$  and  $[Et1^*-CO_2]^-$  was determined to 2:1 using the resonances of the  $\beta$ -protons of the pyrrole rings. The signal of  $CHDCl_2$  is marked with a red asterisk.

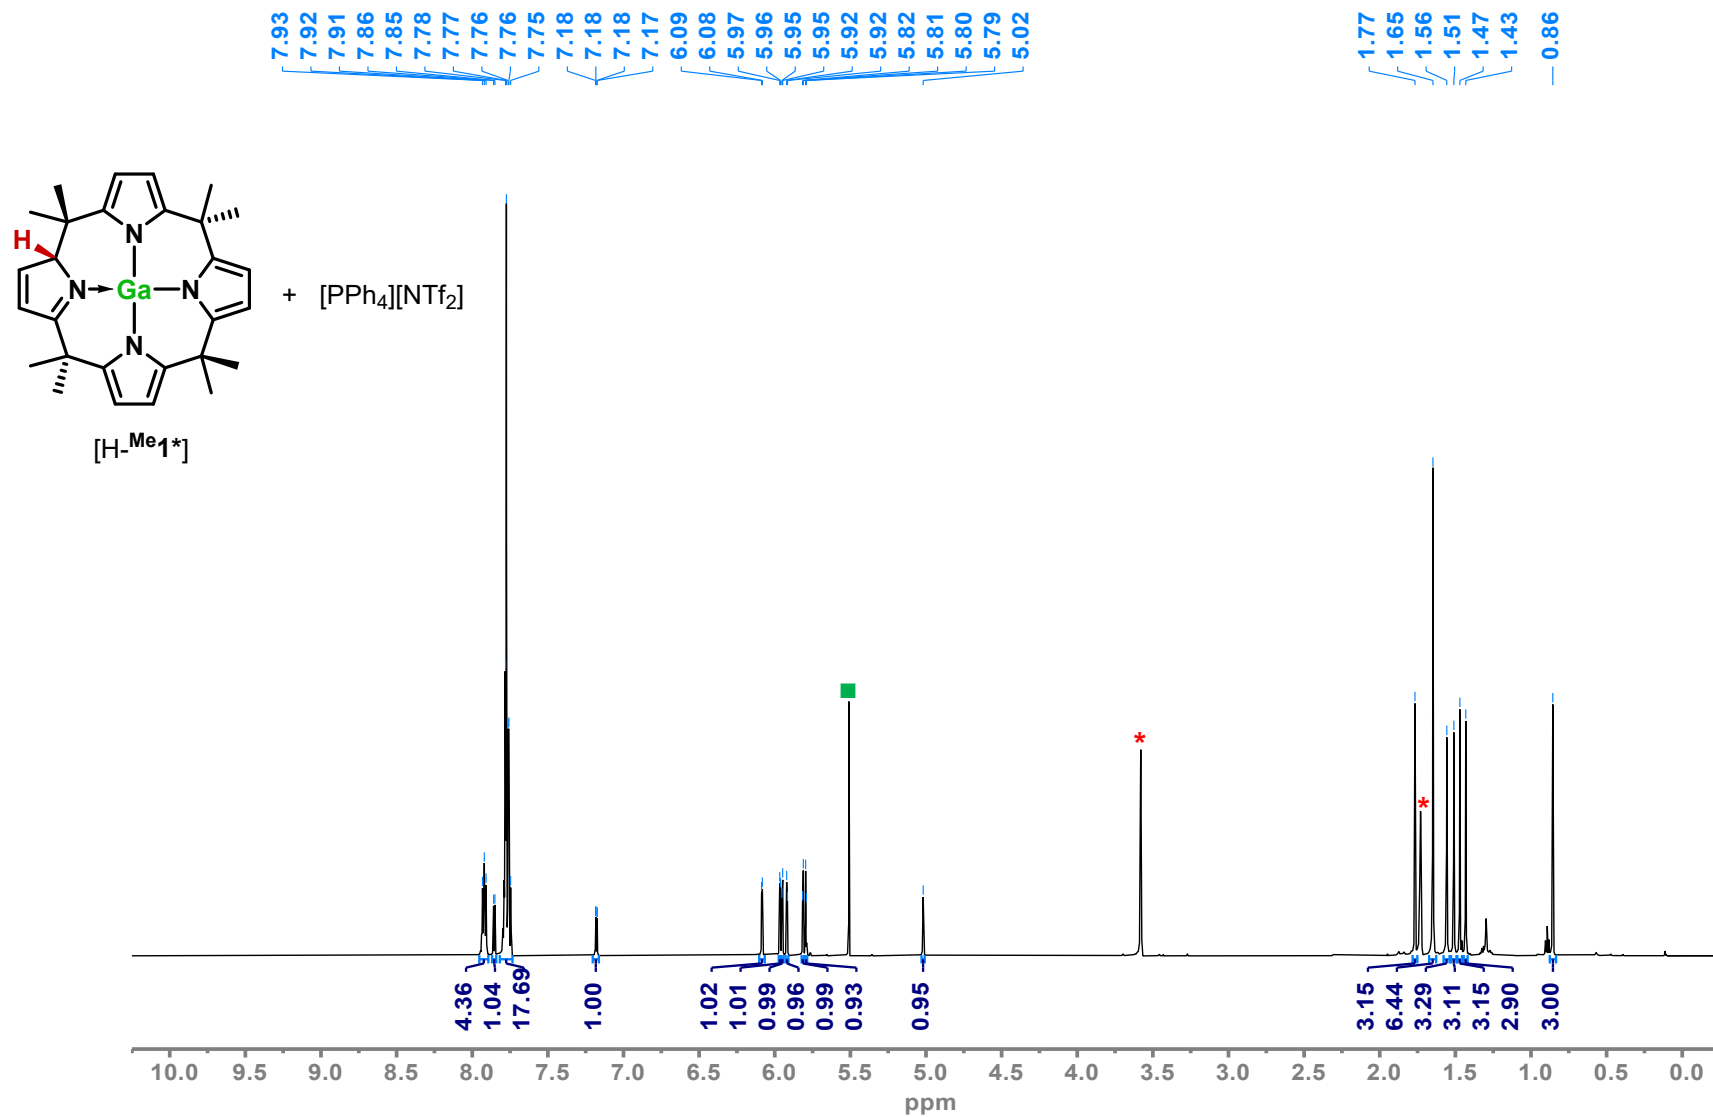

Figure S23.  $^1H$  NMR spectrum (600.2 MHz, THF- $d_8$ , 295 K) of  $[PPh_4][Me1^*]$  in the presence of HNTf<sub>2</sub> (one equivalent). The signal of CH<sub>2</sub>Cl<sub>2</sub>, which is contained in  $[PPh_4][Me1^*]$ , is marked with a green square, those of THF- $d_7$  with red asterisks.

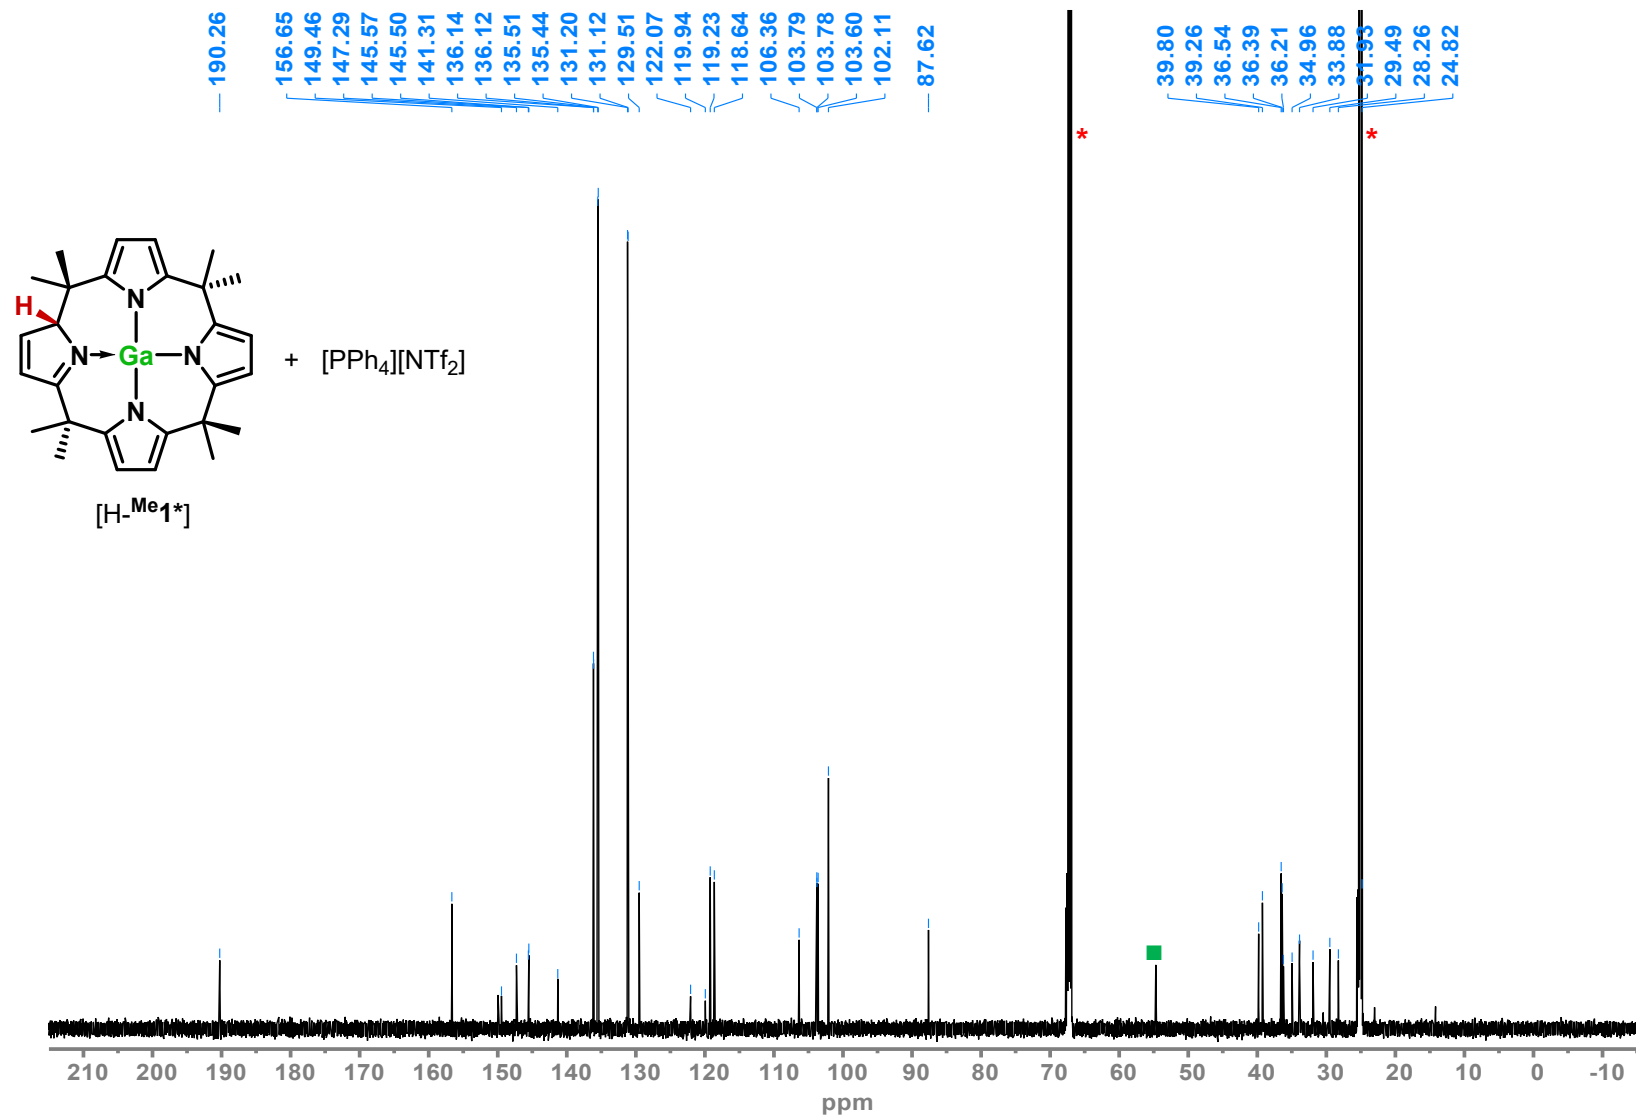

**Figure S24.**  $^{13}C$  NMR spectrum (150.9 MHz, THF- $d_6$ , 295 K) of  $[PPh_4][Me1^*]$  in the presence of HNTf<sub>2</sub> (one equivalent). The signal of CH<sub>2</sub>Cl<sub>2</sub>, which is contained in  $[PPh_4][Me1^*]$ , is marked with a green square, those of THF- $d_6$  with red asterisks.

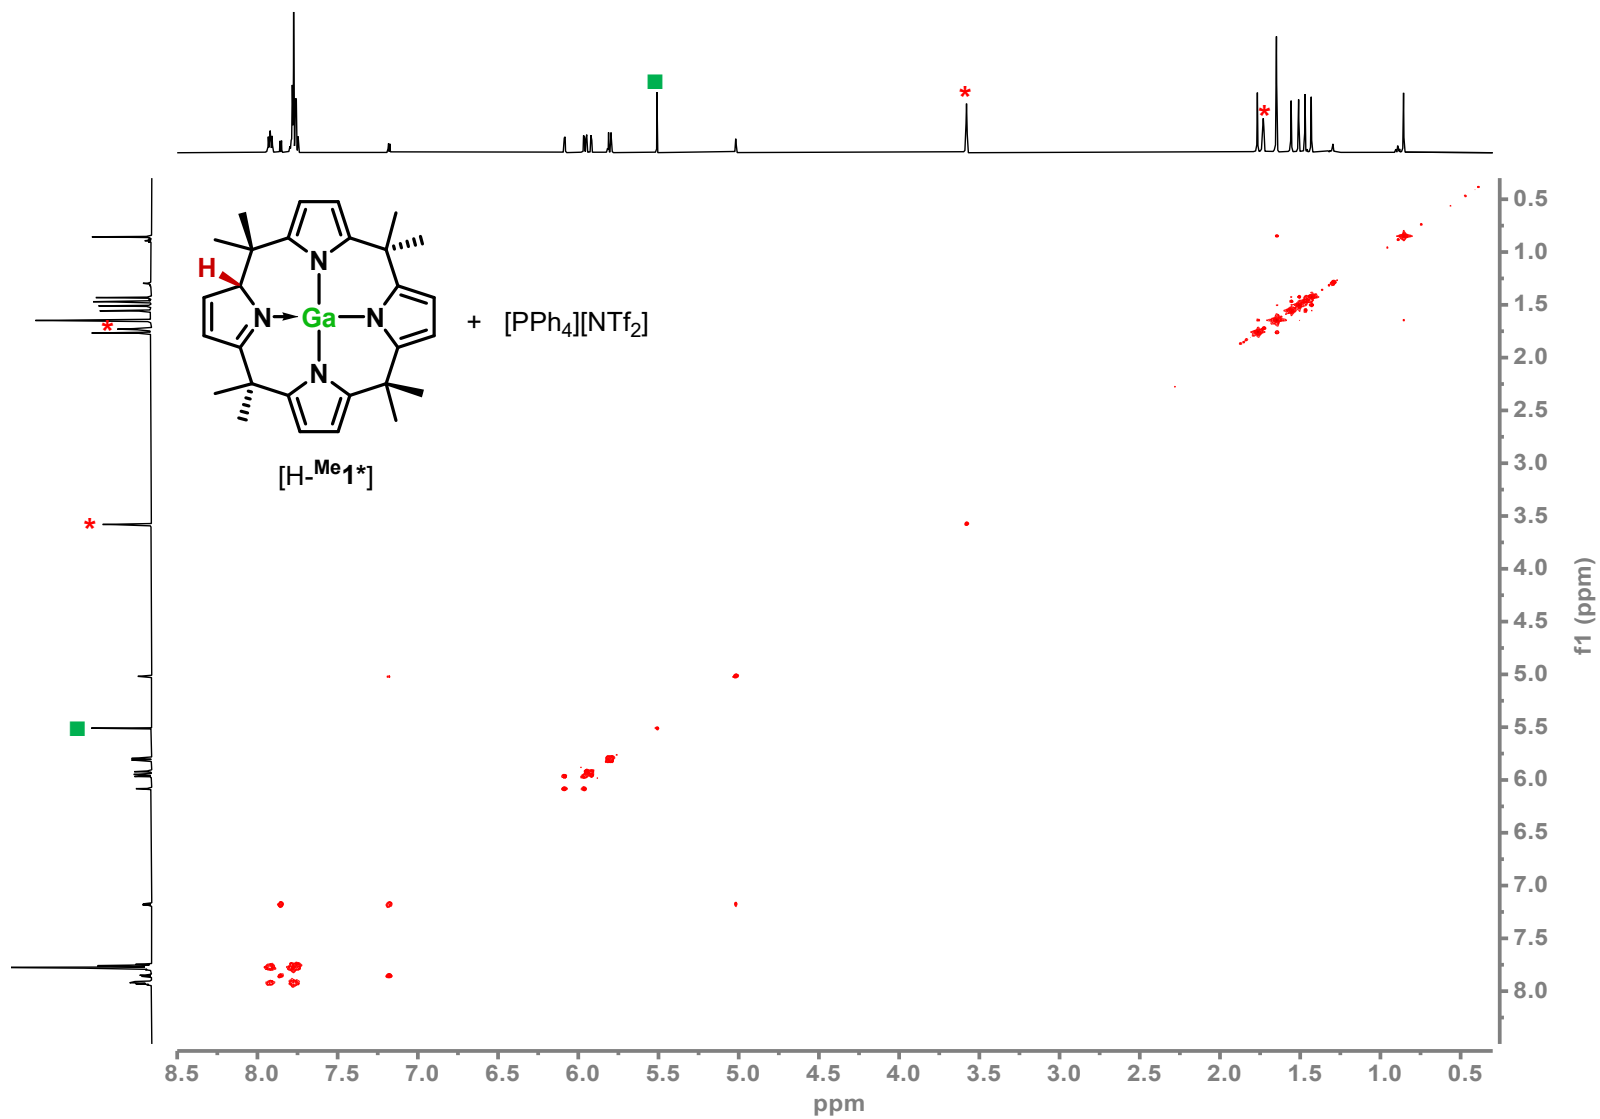

**Figure S25.**  $^1\text{H}, ^1\text{H}$  COSY NMR spectrum (600.2 MHz,  $\text{THF-d}_8$ , 295 K) of  $[\text{PPh}_4][\text{Me}^1]$  in the presence of  $\text{HNTf}_2$  (one equivalent). The signal of  $\text{CH}_2\text{Cl}_2$ , which is contained in  $[\text{PPh}_4][\text{Me}^1]$ , is marked with a green square, those of  $\text{THF-d}_7$ , with red asterisks.

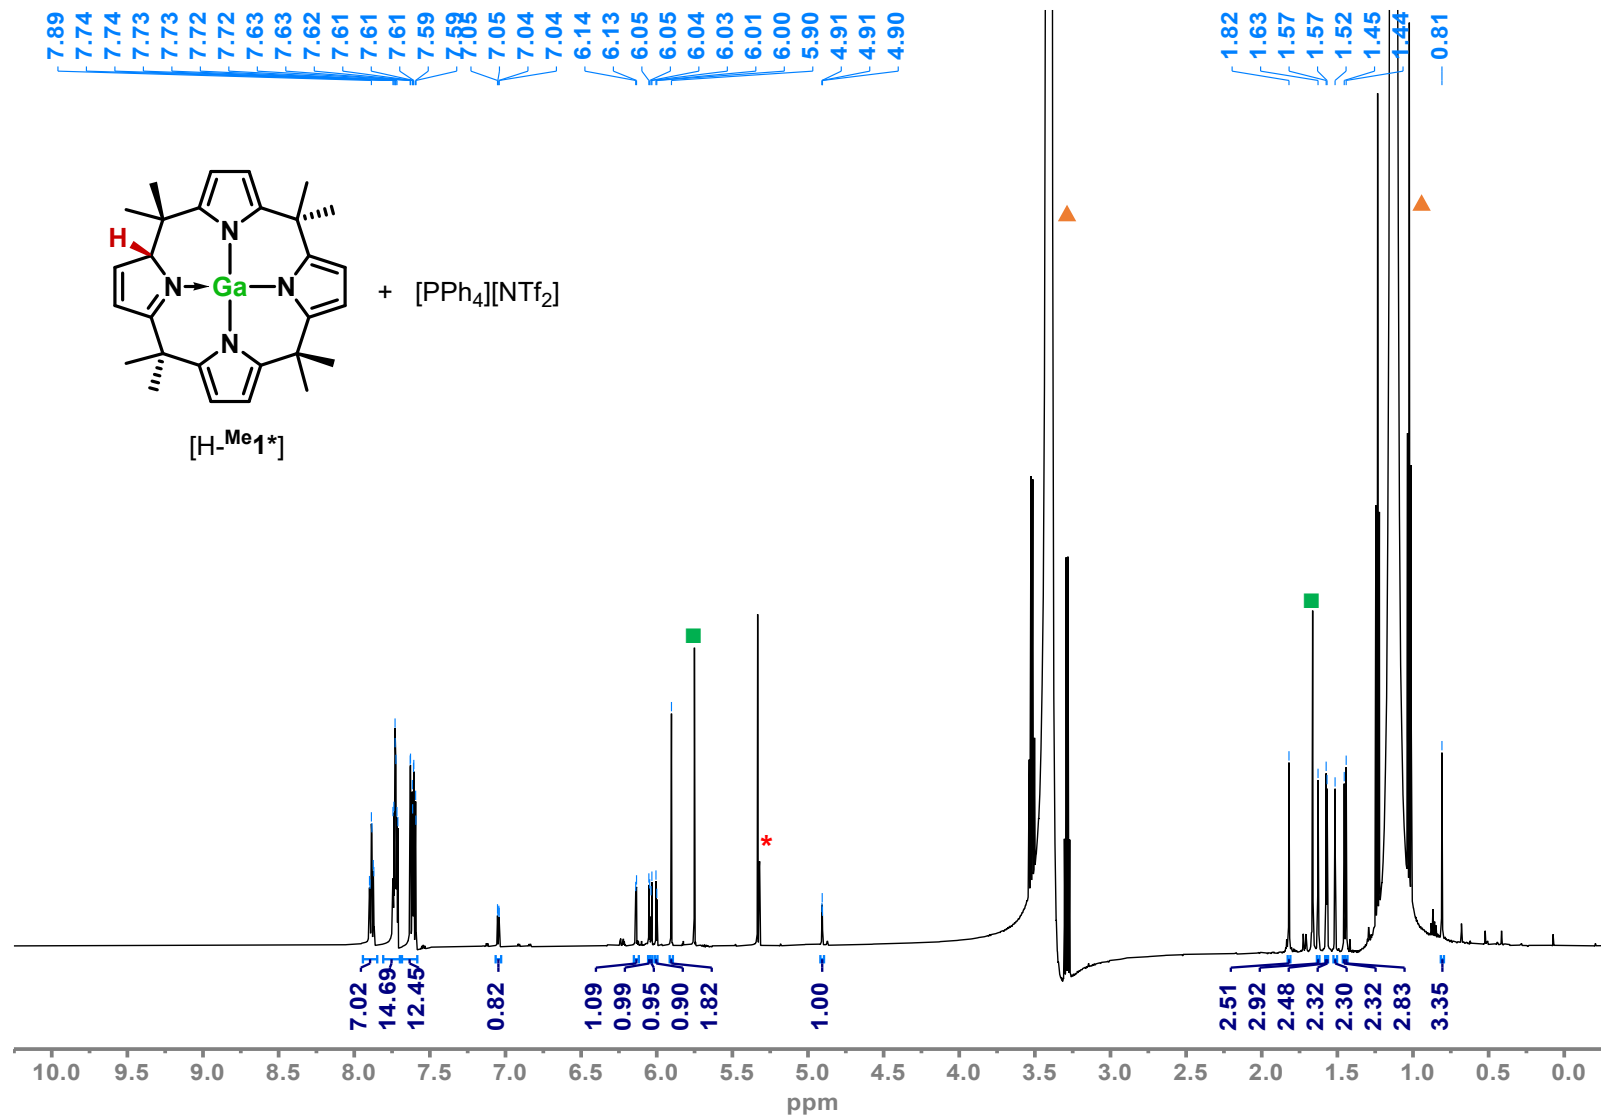

**Figure S26.** <sup>1</sup>H NMR spectrum (600.2 MHz, CD<sub>2</sub>Cl<sub>2</sub> / Et<sub>2</sub>O (2:1 %vol), 295 K) of [PPh<sub>4</sub>][<sup>Me</sup>1] in the presence of HNTf<sub>2</sub> (0.9 equivalents). The signals of unreacted [<sup>Me</sup>1]<sup>-</sup> are marked with green squares. Due to the donor properties of Et<sub>2</sub>O, the methyl groups of [<sup>Me</sup>1]<sup>-</sup> resonate at the same frequency. The signal of CHDCl<sub>2</sub> and residual CH<sub>2</sub>Cl<sub>2</sub> is marked with a red asterisk, those of diethyl ether with orange triangles. The spectrum was calibrated on the signal of CHDCl<sub>2</sub> (5.32 ppm).

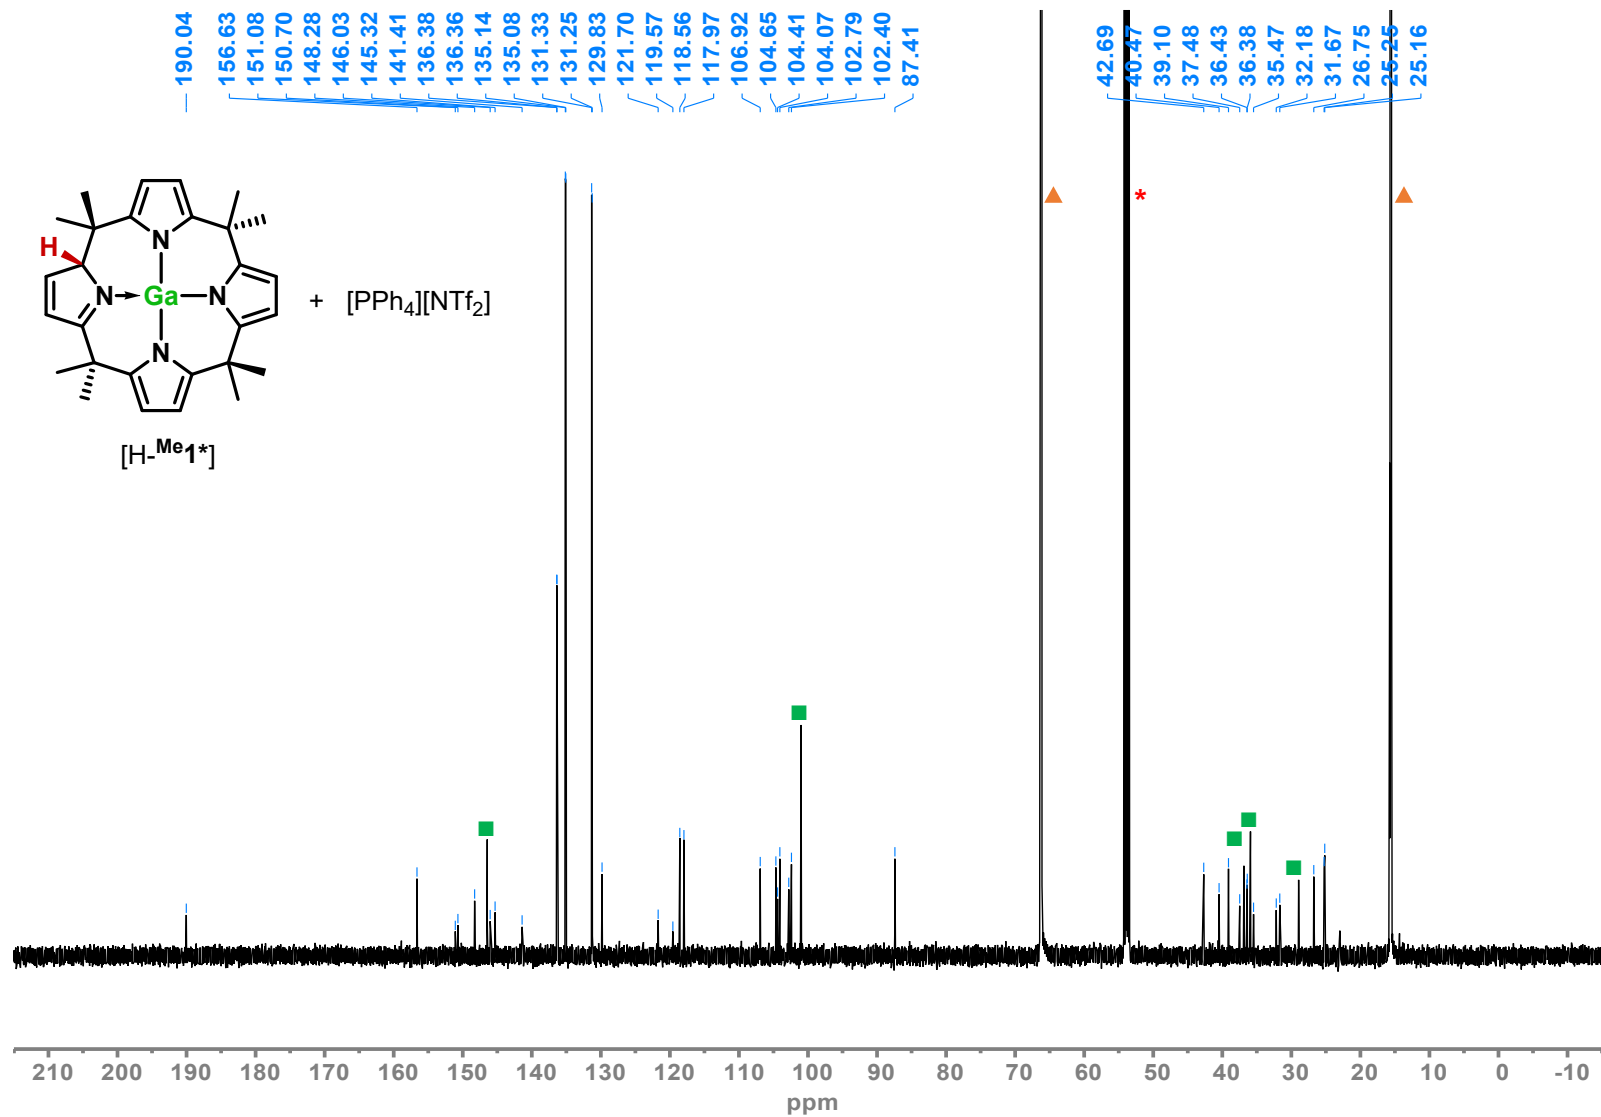

**Figure S27.**  $^{13}\text{C}\{^1\text{H}\}$  NMR spectrum (150.9 MHz,  $\text{CD}_2\text{Cl}_2 / \text{Et}_2\text{O}$  (2:1 %vol), 295 K) of  $[\text{PPh}_4][\text{Me1}]$  in the presence of  $\text{HNTf}_2$  (0.9 equivalents). The signals of unreacted  $[\text{Me1}]^-$  are marked with green squares. The signal of  $\text{CD}_2\text{Cl}_2$  is marked with a red asterisk, those of diethyl ether with an orange triangle. The spectrum was calibrated on the signal of  $\text{CD}_2\text{Cl}_2$  (53.84 ppm).

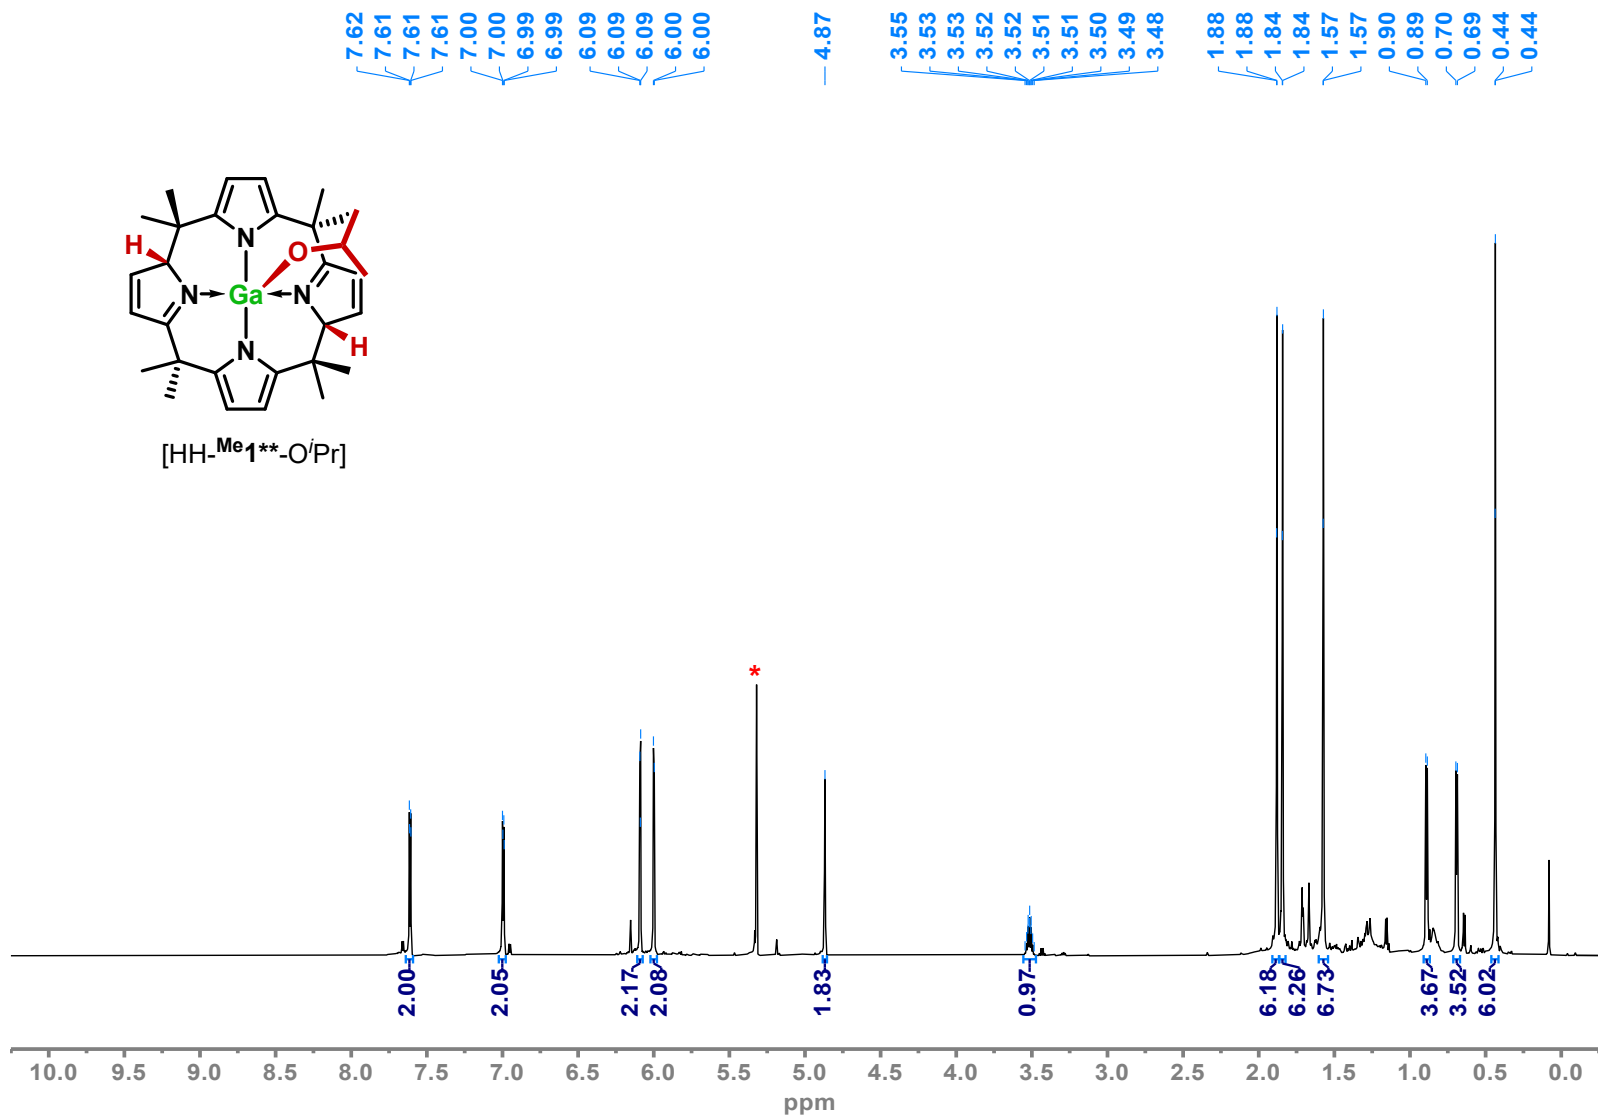

**Figure S28.** <sup>1</sup>H NMR spectrum (600.2 MHz, CD<sub>2</sub>Cl<sub>2</sub>, 295 K) of [HH-Me<sup>1</sup>\*\*<sub>2</sub>-O/Pr]. The signal of CH<sub>2</sub>Cl<sub>2</sub> is marked with a red asterisk. The small signals at 7.66, 6.95, 6.16, 5.19, 3.30, 1.71, 1.70, 1.69, and 0.64 ppm of an additional specie are ascribed to a constitutional isomer of the shown compound in which the two dearomatization-inducing protons are convertible into each other by means of a mirror plane. Its amount is estimated to approximately 8% relative to the main isomer.



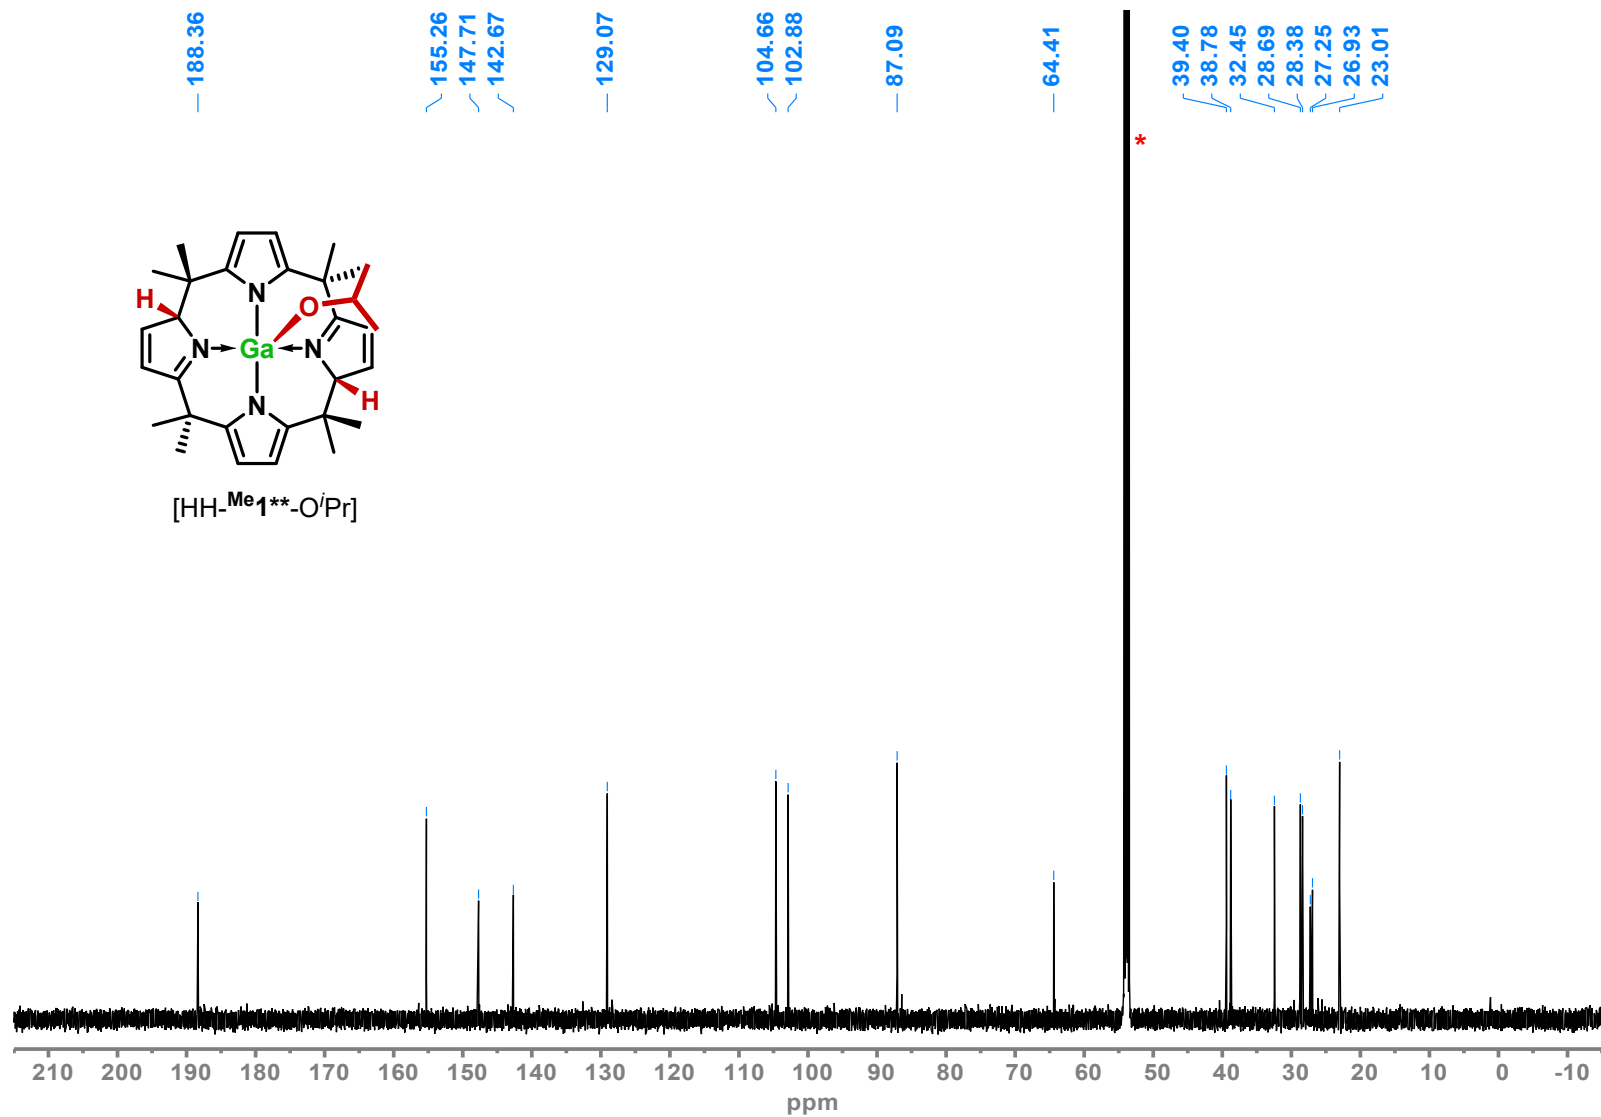

Figure S29.  $^{13}\text{C}\{^1\text{H}\}$  NMR spectrum (150.9 MHz,  $\text{CD}_2\text{Cl}_2$ , 295 K) of [HH-Me1\*\*-O'Pr]. The signal of  $\text{CD}_2\text{Cl}_2$  is marked with a red asterisk.

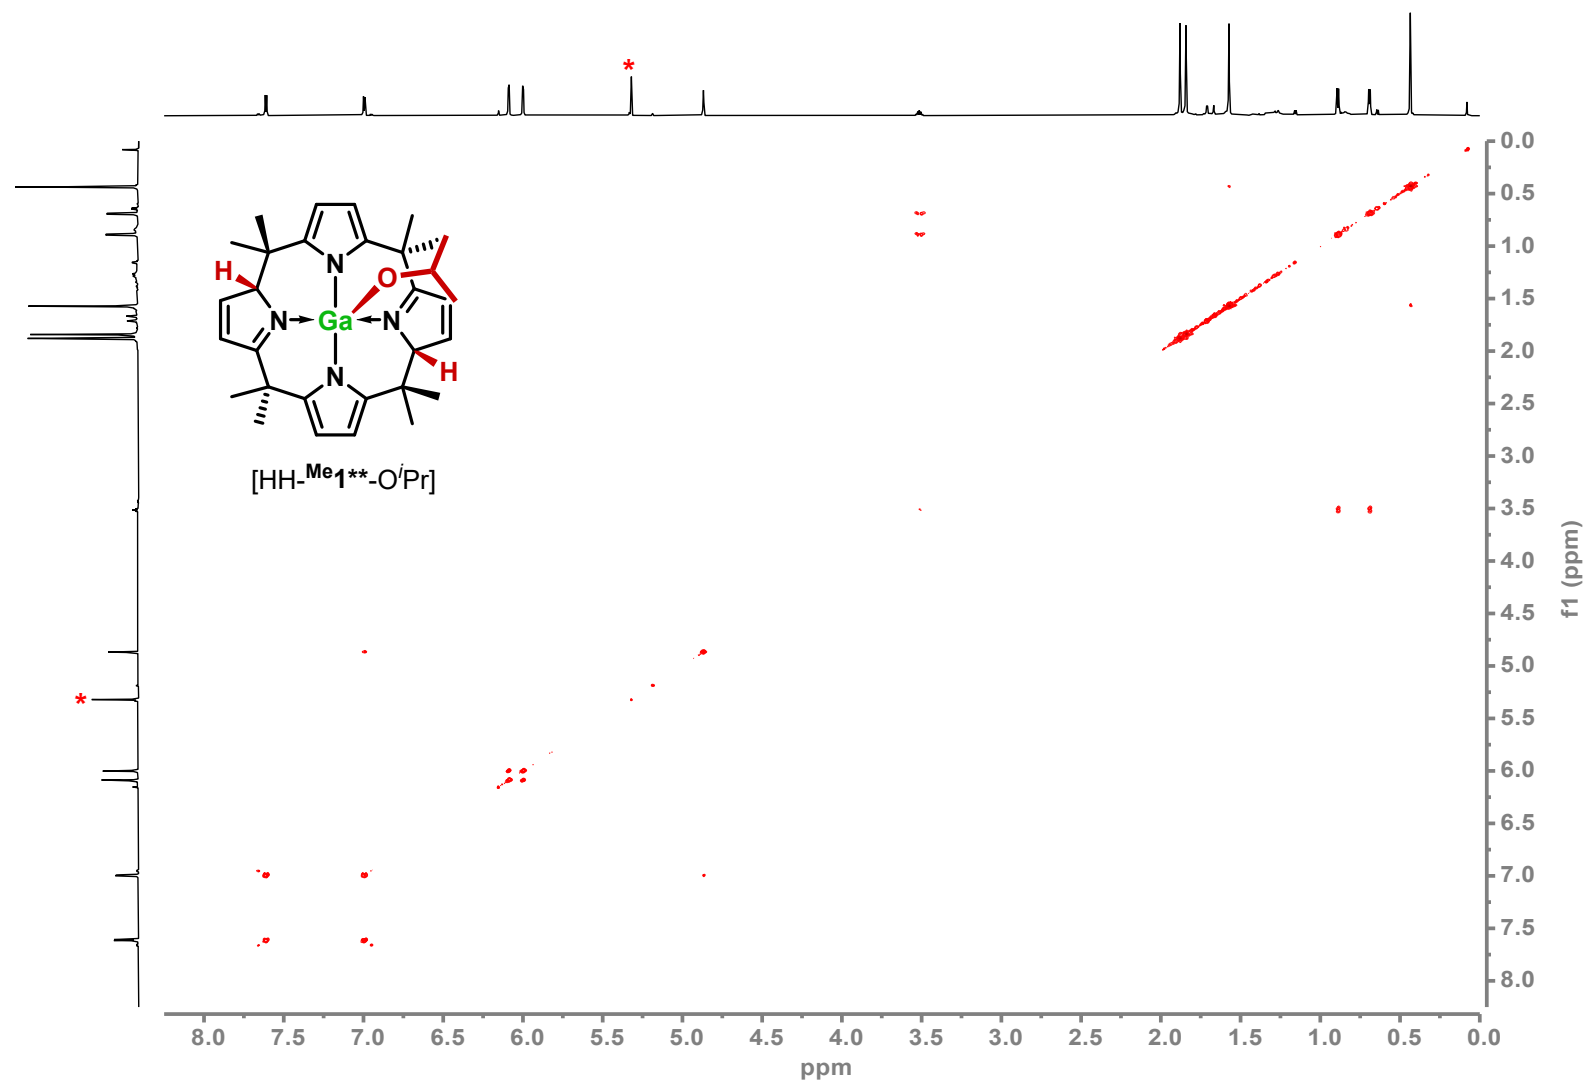

**Figure S30.**  $^1\text{H}$ ,  $^1\text{H}$  COSY NMR spectrum (600.2 MHz,  $\text{CD}_2\text{Cl}_2$ , 295 K) of  $[\text{HH-Me}_1^{**}\text{-O}]\text{Pr}$ . The signal of  $\text{CH}_2\text{Cl}_2$  is marked with a red asterisk.

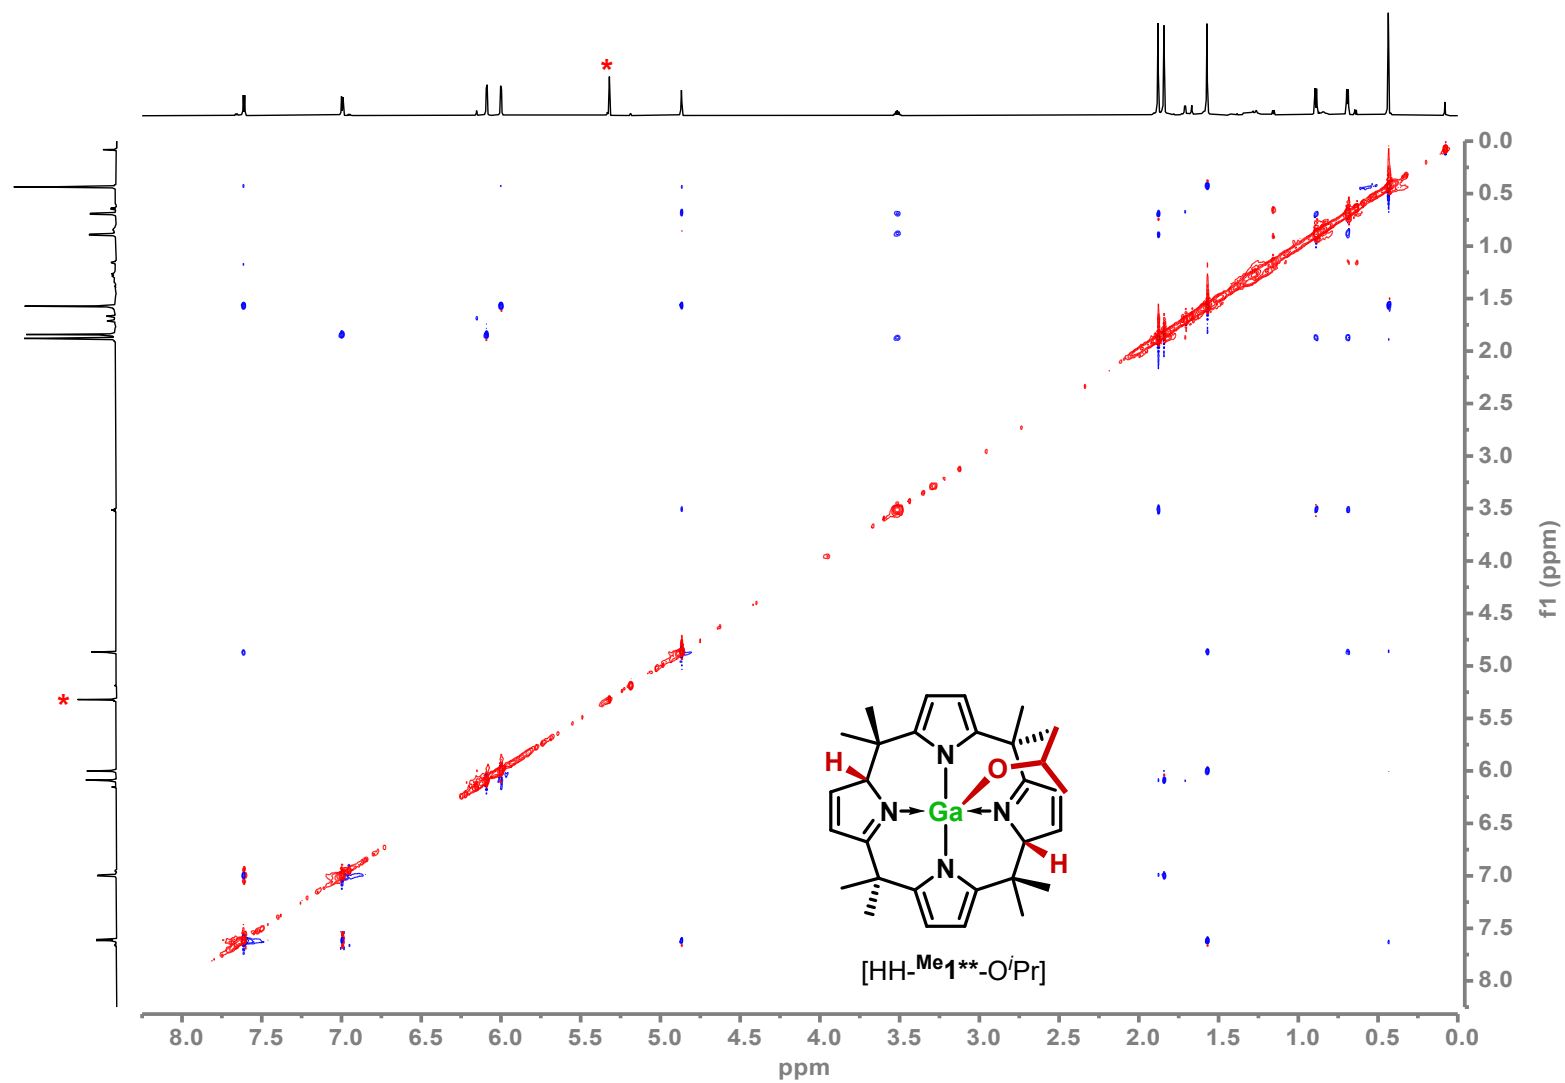

**Figure S31.** <sup>1</sup>H, <sup>1</sup>H NOESY NMR spectrum (600.2 MHz, CD<sub>2</sub>Cl<sub>2</sub>, 295 K) of [HH-Me<sub>1</sub>\*\*<sup>-</sup>-O'Pr]. The signal of CHDCl<sub>2</sub> is marked with a red asterisk.

S10. IR spectra

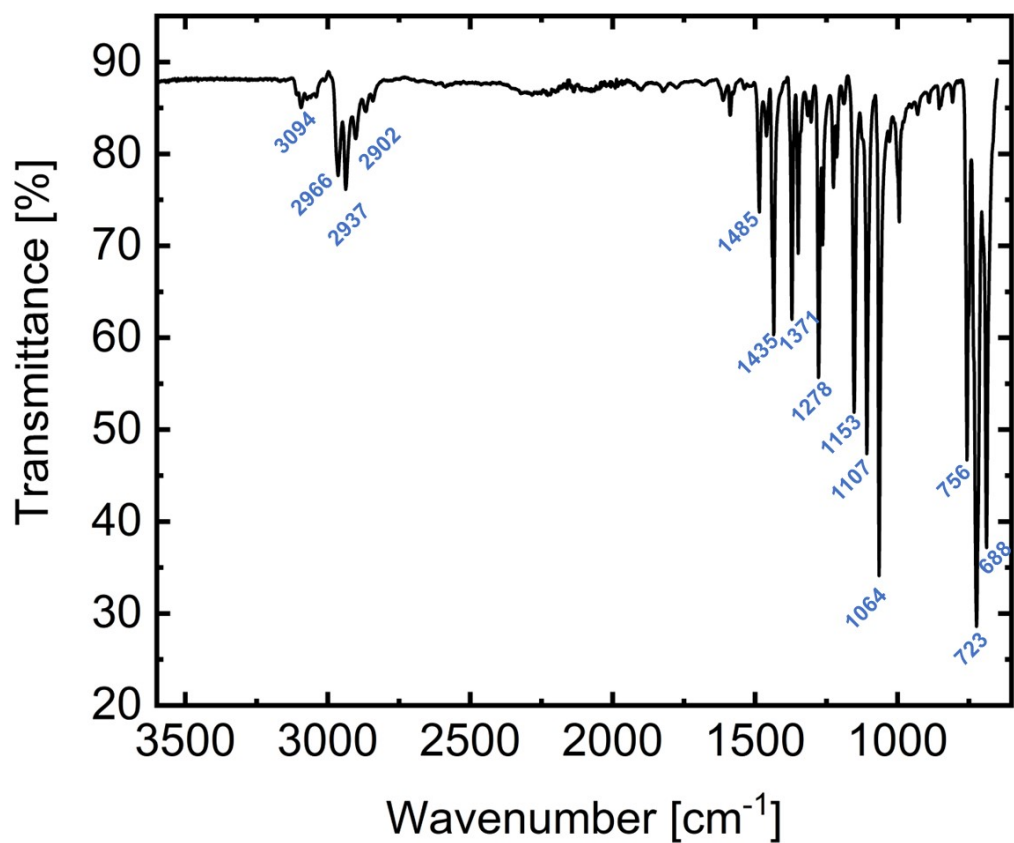

Figure S32. Solid state FT-ATR-IR spectrum of, [PPh<sub>4</sub>][Me<sup>1</sup>]. The spectrum was acquired at room temperature.

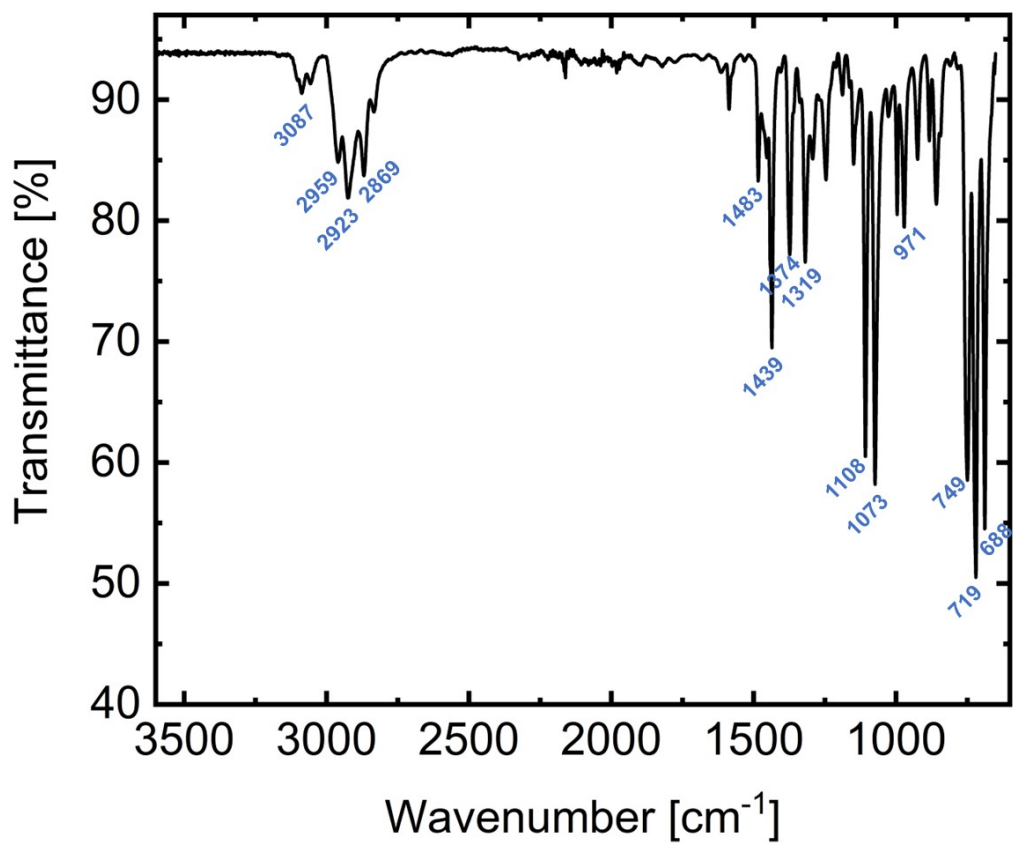

Figure S33. Solid state FT-ATR-IR spectrum of, [PPh<sub>4</sub>][E<sup>1</sup>]. The spectrum was acquired at room temperature.

## S11. Xyz coordinates and energies from DFT calculations

[Me<sup>-1</sup>(Al)]<sup>-</sup>

|                                                                            |                      |
|----------------------------------------------------------------------------|----------------------|
| Total correction:                                                          | 1492.6775 kJ/mol     |
| Final entropy term:                                                        | 218.5914 kJ/mol      |
| Final single point energy:                                                 | -4058925.9228 kJ/mol |
| Final enthalpy:                                                            | -4057430.7663 kJ/mol |
| Final Gibbs free enthalpy:                                                 | -4057649.3577 kJ/mol |
| COSMO-RS correction (CH <sub>2</sub> Cl <sub>2</sub> , enthalpy):          | -218.67 kJ/mol       |
| COSMO-RS correction (CH <sub>2</sub> Cl <sub>2</sub> , Gibbs free energy): | -202.68 kJ/mol       |

xyz, charge: -1, multiplicity: 1

|   |           |           |           |
|---|-----------|-----------|-----------|
| N | -0.138209 | -2.216123 | 0.210180  |
| C | -0.767462 | -3.242779 | 0.893120  |
| C | 0.388090  | -2.757013 | -0.950417 |
| C | -0.646370 | -4.412331 | 0.173399  |
| H | -1.048990 | -5.378744 | 0.444614  |
| C | 0.101364  | -4.104644 | -0.997845 |
| H | 0.394298  | -4.797605 | -1.774749 |
| N | -0.104342 | -0.947039 | 2.590129  |
| C | 0.452540  | -0.290646 | 3.674230  |
| C | -0.739512 | -2.076806 | 3.075875  |
| C | 0.179376  | -0.997069 | 4.826108  |
| C | -0.591616 | -2.131227 | 4.445474  |
| H | -0.991214 | -2.889168 | 5.105397  |
| N | 0.101322  | 1.424022  | 1.322255  |
| C | -0.336557 | 2.529515  | 0.613355  |
| C | 0.640786  | 1.885344  | 2.510679  |
| C | -0.084091 | 3.670706  | 1.344487  |
| H | -0.327563 | 4.684744  | 1.058074  |
| C | 0.550195  | 3.260398  | 2.550531  |
| H | 0.900700  | 3.904963  | 3.345077  |
| N | 0.068704  | 0.155001  | -1.057089 |
| C | 0.577546  | -0.580661 | -2.113582 |
| C | -0.364877 | 1.365222  | -1.570784 |
| C | 0.472545  | 0.154211  | -3.275243 |
| H | 0.799387  | -0.150038 | -4.260222 |
| C | -0.139712 | 1.391850  | -2.930623 |
| H | -0.387038 | 2.198044  | -3.607702 |
| H | 0.506213  | -2.831305 | -3.703989 |
| C | 1.458880  | -2.644770 | -3.198970 |
| C | 2.624039  | -1.686385 | -1.214915 |
| C | 1.236764  | -1.915537 | -1.870648 |
| H | 3.117602  | -2.646006 | -1.021380 |
| H | 1.958959  | -3.603332 | -3.026171 |
| H | 2.526549  | -1.165189 | -0.255226 |
| H | -2.676431 | -1.290126 | 1.274873  |
| C | -2.868999 | -2.240655 | 1.786474  |
| C | -1.902085 | -4.270969 | 2.860741  |
| C | -1.543972 | -2.959875 | 2.154835  |
| H | -0.998227 | -4.817282 | 3.147104  |
| H | -3.465760 | -2.864394 | 1.110670  |
| H | -2.502775 | -4.905440 | 2.200941  |
| H | 2.562963  | -0.001283 | 1.920480  |
| C | 2.682732  | 0.503309  | 2.886509  |
| C | 1.567694  | 1.628491  | 4.810063  |
| C | 1.310484  | 0.933058  | 3.470062  |
| H | 2.077911  | 0.947676  | 5.499345  |
| H | 3.183054  | -0.196872 | 3.565733  |
| H | 0.627452  | 1.951731  | 5.267137  |
| C | -1.077782 | 2.360840  | -0.689738 |
| C | -2.512621 | 1.847767  | -0.397454 |
| C | -1.198854 | 3.708889  | -1.406646 |
| H | -3.068683 | 1.716912  | -1.333270 |
| H | -1.759766 | 3.592912  | -2.339774 |
| H | -2.491948 | 0.877279  | 0.112512  |
| H | -0.209931 | 4.115734  | -1.638949 |
| H | -3.044211 | 2.552215  | 0.253012  |
| H | -1.735259 | 4.426341  | -0.777078 |
| H | 3.256105  | -1.068982 | -1.863865 |
| H | 2.095671  | -2.046253 | -3.858595 |

|    |           |           |          |
|----|-----------|-----------|----------|
| H  | -2.490275 | -4.067883 | 3.761697 |
| H  | -3.446563 | -2.018225 | 2.691310 |
| H  | 2.207772  | 2.504669  | 4.664295 |
| H  | 3.319412  | 1.381016  | 2.725005 |
| H  | 0.496046  | -0.740302 | 5.827837 |
| Al | -0.016213 | -0.396149 | 0.766926 |

[Me<sup>-</sup>]

|                                                                            |                      |
|----------------------------------------------------------------------------|----------------------|
| Total correction:                                                          | 1490.2337 kJ/mol     |
| Final entropy term:                                                        | 222.5634 kJ/mol      |
| Final single point energy:                                                 | -8474889.7485 kJ/mol |
| Final enthalpy:                                                            | -8473397.0358 kJ/mol |
| Final Gibbs free enthalpy:                                                 | -8473619.5992 kJ/mol |
| COSMO-RS correction (CH <sub>2</sub> Cl <sub>2</sub> , enthalpy):          | -217.23 kJ/mol       |
| COSMO-RS correction (CH <sub>2</sub> Cl <sub>2</sub> , Gibbs free energy): | -201.56 kJ/mol       |
| COSMO-RS correction (MeCN, Gibbs free energy):                             | -206.20 kJ/mol       |

xyz, charge: -1, multiplicity: 1

|   |           |           |           |
|---|-----------|-----------|-----------|
| N | -0.141494 | -2.261592 | 0.195305  |
| C | -0.738193 | -3.286689 | 0.902939  |
| C | 0.351656  | -2.783719 | -0.984628 |
| C | -0.628291 | -4.453412 | 0.173479  |
| H | -1.010740 | -5.425584 | 0.453412  |
| C | 0.073489  | -4.135267 | -1.023269 |
| H | 0.344220  | -4.825797 | -1.810412 |
| N | -0.105155 | -0.960354 | 2.636057  |
| C | 0.419415  | -0.277535 | 3.715852  |
| C | -0.708616 | -2.110276 | 3.105878  |
| C | 0.155248  | -0.994050 | 4.865797  |
| C | -0.570612 | -2.155564 | 4.478662  |
| H | -0.949971 | -2.924384 | 5.138049  |
| N | 0.106963  | 1.470982  | 1.336285  |
| C | -0.297972 | 2.569935  | 0.604132  |
| C | 0.609623  | 1.918672  | 2.542197  |
| C | -0.057305 | 3.710128  | 1.344124  |
| H | -0.279634 | 4.726855  | 1.049885  |
| C | 0.528830  | 3.296420  | 2.573355  |
| H | 0.856581  | 3.942033  | 3.376797  |
| N | 0.074212  | 0.169751  | -1.103783 |
| C | 0.546663  | -0.587471 | -2.157738 |
| C | -0.325598 | 1.395166  | -1.599878 |
| C | 0.452230  | 0.156053  | -3.316973 |
| H | 0.756234  | -0.154873 | -4.307228 |
| C | -0.111605 | 1.414173  | -2.963455 |
| H | -0.337484 | 2.228077  | -3.638919 |
| H | 0.407821  | -2.841270 | -3.741908 |
| C | 1.371767  | -2.666216 | -3.254322 |
| C | 2.586569  | -1.726755 | -1.291008 |
| C | 1.183168  | -1.937063 | -1.920007 |
| H | 3.071833  | -2.693695 | -1.113569 |
| H | 1.864539  | -3.630330 | -3.092817 |
| H | 2.513896  | -1.209557 | -0.327253 |
| H | -2.666928 | -1.362877 | 1.309274  |
| C | -2.838079 | -2.314357 | 1.825896  |
| C | -1.822361 | -4.326995 | 2.890063  |
| C | -1.495386 | -3.009030 | 2.180493  |
| H | -0.905858 | -4.856753 | 3.167462  |
| H | -3.430775 | -2.952101 | 1.159665  |
| H | -2.417940 | -4.972187 | 2.236340  |
| H | 2.553799  | 0.043088  | 1.993397  |
| C | 2.648086  | 0.547759  | 2.961923  |
| C | 1.481585  | 1.663131  | 4.860978  |
| C | 1.258594  | 0.963072  | 3.516480  |
| H | 1.985570  | 0.988791  | 5.560863  |
| H | 3.140686  | -0.146615 | 3.652667  |
| H | 0.529120  | 1.976756  | 5.299229  |
| C | -1.019814 | 2.402454  | -0.712858 |
| C | -2.465944 | 1.912059  | -0.433371 |
| C | -1.113489 | 3.752536  | -1.431063 |
| H | -3.014597 | 1.789973  | -1.374712 |

|    |           |           |           |
|----|-----------|-----------|-----------|
| H  | -1.667444 | 3.644963  | -2.369163 |
| H  | -2.463345 | 0.942218  | 0.077582  |
| H  | -0.116404 | 4.144577  | -1.654178 |
| H  | -2.991753 | 2.626446  | 0.210913  |
| H  | -1.644966 | 4.477801  | -0.806557 |
| H  | 3.211885  | -1.114533 | -1.951316 |
| H  | 2.002806  | -2.073412 | -3.924256 |
| H  | -2.405294 | -4.134415 | 3.796494  |
| H  | -3.408549 | -2.101116 | 2.737408  |
| H  | 2.115074  | 2.545668  | 4.726652  |
| H  | 3.277992  | 1.433081  | 2.816079  |
| H  | 0.450566  | -0.727659 | 5.871588  |
| Ga | -0.013878 | -0.395363 | 0.766606  |

[Me1]<sup>-</sup> (tetrahedral configuration around gallium)

Final single point energy:

-8474308.9351 kJ/mol

xyz, charge: -1, multiplicity: 1

|    |           |           |           |
|----|-----------|-----------|-----------|
| Ga | -0.307682 | -0.217675 | 0.701346  |
| N  | -1.449020 | -1.530017 | 0.027451  |
| N  | 0.821547  | -0.973996 | 1.977396  |
| N  | 0.711688  | 0.490224  | -0.690632 |
| N  | -1.315620 | 1.140128  | 1.486998  |
| C  | -1.618675 | -2.702809 | 0.756942  |
| C  | -1.112135 | -1.958964 | -1.302766 |
| C  | -1.875777 | -3.741172 | -0.120894 |
| H  | -2.115907 | -4.763258 | 0.138178  |
| C  | -1.573119 | -3.263489 | -1.420485 |
| H  | -1.499108 | -3.887262 | -2.301410 |
| C  | 1.083644  | -0.257646 | 3.141067  |
| C  | 0.400126  | -2.274366 | 2.421542  |
| C  | 1.307764  | -1.151128 | 4.173827  |
| C  | 0.893328  | -2.425045 | 3.710877  |
| H  | 0.774560  | -3.297556 | 4.339500  |
| C  | -1.511766 | 2.319827  | 0.775585  |
| C  | -0.819992 | 1.552759  | 2.771681  |
| C  | -1.629047 | 3.367266  | 1.672301  |
| H  | -1.851783 | 4.398923  | 1.436684  |
| C  | -1.209126 | 2.875873  | 2.933779  |
| H  | -1.015642 | 3.495477  | 3.799402  |
| C  | 0.818732  | -0.232922 | -1.874384 |
| C  | 0.302481  | 1.808926  | -1.089902 |
| C  | 0.972585  | 0.653474  | -2.926042 |
| H  | 1.146145  | 0.402694  | -3.963550 |
| C  | 0.663684  | 1.942625  | -2.424063 |
| H  | 0.517547  | 2.821130  | -3.038406 |
| H  | -0.418667 | -1.534439 | -3.980658 |
| C  | 0.317512  | -2.106433 | -3.408797 |
| C  | 1.328947  | -2.582698 | -1.174955 |
| C  | 0.334625  | -1.668447 | -1.938372 |
| H  | 1.050454  | -3.635529 | -1.281515 |
| H  | 0.078197  | -3.169134 | -3.493102 |
| H  | 1.366302  | -2.356894 | -0.105711 |
| H  | -1.983367 | -0.896462 | 2.874811  |
| C  | -2.004683 | -1.962627 | 3.116638  |
| C  | -1.178148 | -4.267284 | 2.621377  |
| C  | -1.097619 | -2.800405 | 2.177450  |
| H  | -0.501631 | -4.893437 | 2.032858  |
| H  | -3.040650 | -2.305273 | 3.002370  |
| H  | -2.202044 | -4.636632 | 2.496877  |
| H  | 1.537055  | 1.840989  | 1.316178  |
| C  | 1.618817  | 2.068174  | 2.382813  |
| C  | 0.830920  | 1.635029  | 4.712831  |
| C  | 0.671782  | 1.197616  | 3.250219  |
| H  | 1.855344  | 1.440505  | 5.049070  |
| H  | 2.654614  | 1.867414  | 2.683588  |
| H  | 0.135820  | 1.094735  | 5.361674  |
| C  | -1.138670 | 2.396631  | -0.692102 |
| C  | -2.172954 | 1.599405  | -1.529967 |
| C  | -1.203823 | 3.866237  | -1.129509 |
| H  | -1.977021 | 1.712399  | -2.600584 |

|   |           |           |           |
|---|-----------|-----------|-----------|
| H | -1.047550 | 3.955931  | -2.207061 |
| H | -2.160620 | 0.530028  | -1.302188 |
| H | -0.446968 | 4.463542  | -0.613266 |
| H | -3.177424 | 1.974677  | -1.297924 |
| H | -2.194313 | 4.276596  | -0.903989 |
| H | 2.335771  | -2.424578 | -1.581006 |
| H | 1.307245  | -1.955415 | -3.854044 |
| H | -0.918678 | -4.367088 | 3.678049  |
| H | -1.693821 | -2.073274 | 4.159903  |
| H | 0.647532  | 2.707021  | 4.816691  |
| H | 1.398015  | 3.131876  | 2.513258  |
| H | 1.600190  | -0.909641 | 5.186560  |

## CO<sub>2</sub>

|                                                                            |                     |
|----------------------------------------------------------------------------|---------------------|
| Total correction:                                                          | 37.574 kJ/mol       |
| Final entropy term:                                                        | 63.7135 kJ/mol      |
| Final single point energy:                                                 | -494668.7862 kJ/mol |
| Final enthalpy:                                                            | -494628.7332 kJ/mol |
| Final Gibbs free enthalpy:                                                 | -494692.4467 kJ/mol |
| COSMO-RS correction (CH <sub>2</sub> Cl <sub>2</sub> , enthalpy):          | -10.78 kJ/mol       |
| COSMO-RS correction (CH <sub>2</sub> Cl <sub>2</sub> , Gibbs free energy): | -4.79 kJ/mol        |

xyz, charge: 0, multiplicity: 1

|   |           |           |           |
|---|-----------|-----------|-----------|
| C | 0.000000  | -0.000000 | -0.000000 |
| O | -0.000000 | 0.000000  | 1.163425  |
| O | -0.000000 | 0.000000  | -1.163425 |

## [Me<sub>1</sub>(Al)<sup>-</sup>-CO<sub>2</sub>]<sup>-</sup>

|                                                                            |                      |
|----------------------------------------------------------------------------|----------------------|
| Total correction:                                                          | 1538.0601 kJ/mol     |
| Final entropy term:                                                        | 228.1614 kJ/mol      |
| Final single point energy:                                                 | -4553662.9081 kJ/mol |
| Final enthalpy:                                                            | -4552122.369 kJ/mol  |
| Final Gibbs free enthalpy:                                                 | -4552350.5304 kJ/mol |
| COSMO-RS correction (CH <sub>2</sub> Cl <sub>2</sub> , enthalpy):          | -241.45 kJ/mol       |
| COSMO-RS correction (CH <sub>2</sub> Cl <sub>2</sub> , Gibbs free energy): | -221.84 kJ/mol       |

xyz, charge: -1, multiplicity: 1

|   |           |           |           |
|---|-----------|-----------|-----------|
| N | 1.027226  | -1.301385 | 0.944647  |
| C | 1.812849  | -1.498191 | 3.215071  |
| C | 1.838531  | -2.529802 | 4.346359  |
| H | 2.388766  | -3.425594 | 4.035700  |
| H | 0.825394  | -2.817527 | 4.644340  |
| H | 2.343865  | -2.111357 | 5.221285  |
| C | 3.267297  | -1.101635 | 2.865195  |
| H | 3.848778  | -1.974790 | 2.541577  |
| H | 3.740163  | -0.661302 | 3.748770  |
| H | 3.286888  | -0.361292 | 2.060578  |
| N | 0.593920  | 0.670042  | 2.684922  |
| C | -0.052100 | 1.664577  | 3.395680  |
| C | 1.001082  | -0.278339 | 3.607045  |
| C | -0.049086 | 1.348317  | 4.743316  |
| H | -0.486009 | 1.929832  | 5.542779  |
| C | 0.621682  | 0.108636  | 4.878636  |
| H | 0.809358  | -0.425899 | 5.800126  |
| C | -0.742379 | 2.827668  | 2.711292  |
| C | -2.116636 | 2.368108  | 2.157862  |
| H | -2.735028 | 1.978608  | 2.975972  |
| H | -2.013964 | 1.585043  | 1.404509  |
| H | -2.627893 | 3.220389  | 1.694615  |
| C | -1.015624 | 3.931774  | 3.743129  |
| H | -1.529252 | 4.772392  | 3.266164  |
| H | -0.084984 | 4.294361  | 4.190419  |
| H | -1.667586 | 3.553952  | 4.537275  |
| N | 0.809946  | 2.563287  | 0.725874  |
| C | 1.515761  | 3.382765  | -0.135562 |
| C | 0.120158  | 3.384736  | 1.601615  |
| C | 1.254595  | 4.703279  | 0.171423  |
| H | 1.672280  | 5.573240  | -0.316617 |
| C | 0.361842  | 4.704379  | 1.274683  |



|    |           |           |           |
|----|-----------|-----------|-----------|
| H  | -0.040489 | 5.575736  | 1.772626  |
| C  | 2.584585  | 2.828494  | -1.049108 |
| C  | 2.941645  | 3.859978  | -2.124922 |
| H  | 3.298664  | 4.783716  | -1.659617 |
| H  | 2.070876  | 4.096764  | -2.744233 |
| H  | 3.740457  | 3.476489  | -2.768912 |
| C  | 3.856820  | 2.563058  | -0.199409 |
| H  | 4.653354  | 2.139199  | -0.823689 |
| H  | 3.638595  | 1.853906  | 0.605607  |
| H  | 4.204371  | 3.496749  | 0.257891  |
| N  | 1.733597  | 0.468502  | -0.933662 |
| C  | 1.491933  | -0.582311 | -1.817820 |
| C  | 2.164313  | 1.534177  | -1.696718 |
| C  | 1.768715  | -0.168470 | -3.106999 |
| H  | 1.680798  | -0.761873 | -4.006985 |
| C  | 2.206546  | 1.175800  | -3.030106 |
| H  | 2.504690  | 1.803077  | -3.858530 |
| C  | 1.153022  | -1.997612 | -1.397330 |
| C  | 0.403373  | -2.732565 | -2.515306 |
| H  | 1.040550  | -2.787452 | -3.402671 |
| H  | -0.526419 | -2.225209 | -2.778273 |
| H  | 0.168764  | -3.759187 | -2.213826 |
| C  | 2.464352  | -2.760161 | -1.105138 |
| H  | 3.064557  | -2.777336 | -2.019901 |
| H  | 2.270848  | -3.793145 | -0.789473 |
| H  | 3.050181  | -2.255035 | -0.332541 |
| C  | 1.162130  | -2.064032 | 1.982630  |
| C  | 0.276278  | -1.984576 | -0.083002 |
| C  | 0.531388  | -3.358972 | 1.752056  |
| H  | 0.479937  | -4.171214 | 2.465231  |
| C  | -0.021186 | -3.311701 | 0.520915  |
| H  | -0.612919 | -4.075893 | 0.034807  |
| Al | 0.736874  | 0.664178  | 0.732350  |
| O  | -0.913718 | 0.103904  | 0.070459  |
| C  | -1.030983 | -1.122003 | -0.330227 |
| O  | -1.997111 | -1.637173 | -0.859611 |

[Me1\*-CO<sub>2</sub>]<sup>-</sup>

|                                                                            |                      |
|----------------------------------------------------------------------------|----------------------|
| Total correction:                                                          | 1535.4599 kJ/mol     |
| Final entropy term:                                                        | 232.1462 kJ/mol      |
| Final single point energy:                                                 | -8969597.7595 kJ/mol |
| Final enthalpy:                                                            | -8968059.8206 kJ/mol |
| Final Gibbs free enthalpy:                                                 | -8968291.9668 kJ/mol |
| COSMO-RS correction (CH <sub>2</sub> Cl <sub>2</sub> , enthalpy):          | -239.96 kJ/mol       |
| COSMO-RS correction (CH <sub>2</sub> Cl <sub>2</sub> , Gibbs free energy): | -220.49 kJ/mol       |

xyz, charge: -1, multiplicity: 1

|   |           |           |          |
|---|-----------|-----------|----------|
| N | 1.051056  | -1.350948 | 0.951458 |
| C | 1.750108  | -1.535900 | 3.255557 |
| C | 1.737938  | -2.571474 | 4.383753 |
| H | 2.285178  | -3.472090 | 4.082117 |
| H | 0.715021  | -2.849628 | 4.656501 |
| H | 2.227236  | -2.162006 | 5.271874 |
| C | 3.216758  | -1.151882 | 2.943959 |
| H | 3.795818  | -2.028954 | 2.626799 |
| H | 3.673063  | -0.724015 | 3.842315 |
| H | 3.262169  | -0.405368 | 2.146377 |
| N | 0.588797  | 0.668527  | 2.732556 |
| C | -0.039259 | 1.678110  | 3.431943 |
| C | 0.950536  | -0.304930 | 3.642761 |
| C | -0.070188 | 1.346855  | 4.776825 |
| H | -0.503449 | 1.932896  | 5.575119 |
| C | 0.558201  | 0.084811  | 4.911112 |
| H | 0.712182  | -0.462331 | 5.831464 |
| C | -0.694555 | 2.859183  | 2.739784 |
| C | -2.057699 | 2.415959  | 2.146435 |
| H | -2.699987 | 2.023237  | 2.944134 |
| H | -1.942898 | 1.637243  | 1.389583 |
| H | -2.550265 | 3.275556  | 1.676677 |
| C | -0.981450 | 3.954752  | 3.776179 |
| H | -1.475048 | 4.805184  | 3.295443 |

|    |           |           |           |
|----|-----------|-----------|-----------|
| H  | -0.058093 | 4.303686  | 4.248998  |
| H  | -1.654798 | 3.575391  | 4.551315  |
| N  | 0.829111  | 2.616369  | 0.734465  |
| C  | 1.535475  | 3.422174  | -0.133385 |
| C  | 0.186271  | 3.426742  | 1.649242  |
| C  | 1.323956  | 4.742936  | 0.215313  |
| H  | 1.751551  | 5.612329  | -0.265211 |
| C  | 0.463674  | 4.745897  | 1.344877  |
| H  | 0.101281  | 5.618320  | 1.870987  |
| C  | 2.551452  | 2.853472  | -1.100939 |
| C  | 2.857802  | 3.886326  | -2.191867 |
| H  | 3.243040  | 4.807234  | -1.743969 |
| H  | 1.956791  | 4.129806  | -2.763392 |
| H  | 3.619723  | 3.500221  | -2.877511 |
| C  | 3.863507  | 2.581576  | -0.316095 |
| H  | 4.624938  | 2.153619  | -0.980026 |
| H  | 3.684645  | 1.873339  | 0.499129  |
| H  | 4.237978  | 3.514376  | 0.121114  |
| N  | 1.770365  | 0.465131  | -0.966047 |
| C  | 1.489599  | -0.582959 | -1.839566 |
| C  | 2.103301  | 1.559532  | -1.737368 |
| C  | 1.660326  | -0.142944 | -3.138817 |
| H  | 1.526885  | -0.726332 | -4.039541 |
| C  | 2.058095  | 1.215356  | -3.074965 |
| H  | 2.280889  | 1.858036  | -3.915318 |
| C  | 1.216468  | -2.007702 | -1.400205 |
| C  | 0.518117  | -2.791518 | -2.517469 |
| H  | 1.162761  | -2.814718 | -3.401039 |
| H  | -0.439780 | -2.343124 | -2.786755 |
| H  | 0.344524  | -3.827916 | -2.208569 |
| C  | 2.556503  | -2.705631 | -1.081085 |
| H  | 3.158023  | -2.737700 | -1.994933 |
| H  | 2.399195  | -3.732418 | -0.726322 |
| H  | 3.122181  | -2.151938 | -0.327445 |
| C  | 1.132669  | -2.101147 | 2.003010  |
| C  | 0.322269  | -2.021935 | -0.095497 |
| C  | 0.502647  | -3.394125 | 1.752979  |
| H  | 0.413045  | -4.202462 | 2.467054  |
| C  | 0.005994  | -3.351062 | 0.497485  |
| H  | -0.574861 | -4.112125 | -0.006220 |
| Ga | 0.756979  | 0.678705  | 0.738498  |
| O  | -0.959580 | 0.039573  | 0.039203  |
| C  | -1.004056 | -1.184626 | -0.371070 |
| O  | -1.930896 | -1.734469 | -0.938527 |

C-C bond formation/cleavage transition structure between CO<sub>2</sub> and [Me<sup>1</sup>(Al)]<sup>-</sup>

|                                                                            |                      |
|----------------------------------------------------------------------------|----------------------|
| Total correction:                                                          | 1532.8285 kJ/mol     |
| Final entropy term:                                                        | 234.4021 kJ/mol      |
| Final single point energy:                                                 | -4553573.8917 kJ/mol |
| Final enthalpy:                                                            | -4552038.5842 kJ/mol |
| Final Gibbs free enthalpy:                                                 | -4552272.9863 kJ/mol |
| COSMO-RS correction (CH <sub>2</sub> Cl <sub>2</sub> , enthalpy):          | -214.77 kJ/mol       |
| COSMO-RS correction (CH <sub>2</sub> Cl <sub>2</sub> , Gibbs free energy): | -200.13 kJ/mol       |

xyz, charge: -1, multiplicity: 1

|    |           |           |           |
|----|-----------|-----------|-----------|
| Al | 2.050345  | 7.999915  | 12.964976 |
| O  | 3.191684  | 7.780519  | 11.240846 |
| N  | 3.682885  | 7.537810  | 13.959969 |
| N  | 0.333842  | 8.471385  | 12.240288 |
| N  | 2.557028  | 9.847652  | 13.164760 |
| N  | 1.463876  | 6.154005  | 13.091634 |
| C  | 1.713785  | 10.936340 | 13.056443 |
| C  | -0.506407 | 7.655677  | 11.491535 |
| C  | 1.881039  | 5.197116  | 14.004011 |
| C  | 3.851486  | 10.327264 | 13.027744 |
| C  | 2.812520  | 5.544902  | 15.137993 |
| C  | -0.309108 | 9.692814  | 12.368690 |
| C  | 3.947876  | 6.359738  | 14.587083 |
| C  | 2.054738  | 6.371112  | 16.206433 |
| H  | 1.652527  | 7.296623  | 15.782104 |
| H  | 2.725036  | 6.645272  | 17.030243 |

|   |           |           |           |
|---|-----------|-----------|-----------|
| H | 1.214006  | 5.787781  | 16.597899 |
| C | -1.515311 | 9.657956  | 11.703688 |
| H | -2.238226 | 10.459456 | 11.641155 |
| C | 4.899695  | 8.044567  | 13.492861 |
| C | 0.534224  | 5.533699  | 12.265602 |
| C | 2.449990  | 12.082673 | 12.841839 |
| H | 2.062274  | 13.085014 | 12.724116 |
| C | 0.392663  | 4.213075  | 12.644002 |
| H | -0.254074 | 3.478988  | 12.184490 |
| C | 3.811284  | 11.692496 | 12.814408 |
| H | 4.664893  | 12.344691 | 12.678939 |
| C | 4.236457  | 7.199651  | 11.229997 |
| C | 1.246633  | 3.999781  | 13.754334 |
| H | 1.367631  | 3.079903  | 14.309746 |
| C | -0.156177 | 6.235187  | 11.117829 |
| C | 0.234571  | 10.773239 | 13.266675 |
| C | -1.637676 | 8.362987  | 11.139613 |
| H | -2.467681 | 7.996979  | 10.551647 |
| C | 5.911168  | 7.146651  | 13.848541 |
| H | 6.968811  | 7.274015  | 13.653889 |
| C | 5.313138  | 6.083974  | 14.539832 |
| H | 5.805533  | 5.206699  | 14.935650 |
| C | -1.448544 | 5.472929  | 10.775559 |
| H | -2.124001 | 5.441926  | 11.635224 |
| H | -1.214357 | 4.448258  | 10.470373 |
| H | -1.961564 | 5.955625  | 9.938175  |
| C | 5.118692  | 9.519285  | 13.204976 |
| C | -0.028686 | 10.381492 | 14.745237 |
| H | 0.458313  | 9.431856  | 14.991997 |
| H | -1.104419 | 10.261145 | 14.919026 |
| H | 0.370770  | 11.147950 | 15.420389 |
| C | 0.719716  | 6.204766  | 9.837079  |
| H | 0.165521  | 6.648309  | 9.001365  |
| H | 0.982568  | 5.169576  | 9.587820  |
| H | 1.639468  | 6.774084  | 9.964569  |
| C | 3.342558  | 4.273615  | 15.806719 |
| H | 2.516885  | 3.707751  | 16.249451 |
| H | 4.045893  | 4.533704  | 16.605500 |
| H | 3.851857  | 3.630568  | 15.082257 |
| C | -0.485985 | 12.097872 | 12.997849 |
| H | -0.096011 | 12.879534 | 13.658337 |
| H | -1.557815 | 11.993226 | 13.193438 |
| H | -0.349380 | 12.412994 | 11.958707 |
| C | 5.862394  | 10.099783 | 14.443068 |
| H | 6.022639  | 11.176297 | 14.323897 |
| H | 6.830242  | 9.604021  | 14.580322 |
| H | 5.259231  | 9.939481  | 15.341977 |
| C | 6.037332  | 9.701852  | 11.977868 |
| H | 5.515643  | 9.441702  | 11.051032 |
| H | 6.934154  | 9.077045  | 12.061356 |
| H | 6.351796  | 10.746941 | 11.891582 |
| O | 5.110087  | 6.536341  | 10.843001 |

C-C bond formation/cleavage transition structure between CO<sub>2</sub> and [Me<sup>-1</sup>]

|                                                                            |                      |
|----------------------------------------------------------------------------|----------------------|
| Total correction:                                                          | 1531.267 kJ/mol      |
| Final entropy term:                                                        | 238.0944 kJ/mol      |
| Final single point energy:                                                 | -8969527.9306 kJ/mol |
| Final enthalpy:                                                            | -8967994.1847 kJ/mol |
| Final Gibbs free enthalpy:                                                 | -8968232.2791 kJ/mol |
| COSMO-RS correction (CH <sub>2</sub> Cl <sub>2</sub> , enthalpy):          | -208.91 kJ/mol       |
| COSMO-RS correction (CH <sub>2</sub> Cl <sub>2</sub> , Gibbs free energy): | -195.80 kJ/mol       |

xyz, charge: -1, multiplicity: 1

|    |           |           |           |
|----|-----------|-----------|-----------|
| Ga | 2.015080  | 7.964577  | 12.985070 |
| O  | 3.225496  | 7.620702  | 11.130081 |
| N  | 3.743350  | 7.491287  | 13.931448 |
| N  | 0.252475  | 8.464681  | 12.243857 |
| N  | 2.591441  | 9.872700  | 13.103380 |
| N  | 1.397829  | 6.077518  | 13.154366 |
| C  | 1.768354  | 10.933338 | 12.780196 |
| C  | -0.648302 | 7.618683  | 11.611745 |

|   |           |           |           |
|---|-----------|-----------|-----------|
| C | 1.868093  | 5.121423  | 14.036793 |
| C | 3.898749  | 10.287095 | 12.873584 |
| C | 2.962038  | 5.416137  | 15.030683 |
| C | -0.339414 | 9.714769  | 12.308764 |
| C | 4.030734  | 6.234053  | 14.362914 |
| C | 2.388409  | 6.215998  | 16.227676 |
| H | 1.931085  | 7.152191  | 15.894052 |
| H | 3.182355  | 6.464729  | 16.942790 |
| H | 1.617846  | 5.621413  | 16.730578 |
| C | -1.585016 | 9.664307  | 11.721111 |
| H | -2.284876 | 10.483131 | 11.628573 |
| C | 4.909756  | 8.030006  | 13.386310 |
| C | 0.362886  | 5.493956  | 12.437774 |
| C | 2.527974  | 11.995080 | 12.335139 |
| H | 2.160436  | 12.961280 | 12.018239 |
| C | 0.191493  | 4.192559  | 12.867577 |
| H | -0.529970 | 3.481828  | 12.490055 |
| C | 3.883760  | 11.581324 | 12.389812 |
| H | 4.748210  | 12.182804 | 12.142944 |
| C | 4.404829  | 7.759439  | 11.015068 |
| C | 1.146768  | 3.956260  | 13.886285 |
| H | 1.285133  | 3.039226  | 14.442305 |
| C | -0.339151 | 6.178710  | 11.290515 |
| C | 0.292839  | 10.858194 | 13.056809 |
| C | -1.779047 | 8.333562  | 11.273811 |
| H | -2.650906 | 7.951112  | 10.762062 |
| C | 5.919667  | 7.062214  | 13.486344 |
| H | 6.947116  | 7.185442  | 13.169344 |
| C | 5.365509  | 5.928522  | 14.100815 |
| H | 5.866996  | 4.995305  | 14.315988 |
| C | -1.650166 | 5.435655  | 10.987460 |
| H | -2.319386 | 5.445427  | 11.853040 |
| H | -1.439755 | 4.397483  | 10.712977 |
| H | -2.160202 | 5.902947  | 10.139764 |
| C | 5.088536  | 9.536264  | 13.417371 |
| C | 0.079120  | 10.651219 | 14.580354 |
| H | 0.528670  | 9.711391  | 14.916876 |
| H | -0.992823 | 10.613689 | 14.806370 |
| H | 0.545744  | 11.467765 | 15.144777 |
| C | 0.528417  | 6.093215  | 10.006920 |
| H | -0.010804 | 6.545816  | 9.166252  |
| H | 0.748223  | 5.044190  | 9.774617  |
| H | 1.473375  | 6.621745  | 10.126474 |
| C | 3.556923  | 4.111223  | 15.570490 |
| H | 2.795898  | 3.544628  | 16.115627 |
| H | 4.379163  | 4.330502  | 16.260483 |
| H | 3.933860  | 3.484444  | 14.756525 |
| C | -0.381176 | 12.177675 | 12.665715 |
| H | 0.076569  | 13.009267 | 13.211863 |
| H | -1.445162 | 12.149126 | 12.919982 |
| H | -0.285321 | 12.363696 | 11.591449 |
| C | 5.228152  | 9.923267  | 14.920345 |
| H | 5.384399  | 11.004236 | 15.011719 |
| H | 6.074120  | 9.391772  | 15.373979 |
| H | 4.316422  | 9.655918  | 15.461365 |
| C | 6.378719  | 9.967386  | 12.709954 |
| H | 6.346714  | 9.765365  | 11.637551 |
| H | 7.240718  | 9.448207  | 13.141273 |
| H | 6.536770  | 11.040164 | 12.854597 |
| O | 5.426232  | 7.848296  | 10.448626 |

[Et<sup>+</sup>-CO<sub>2</sub>]<sup>-</sup>

|                                                                            |                      |
|----------------------------------------------------------------------------|----------------------|
| Total correction:                                                          | 2159.3781 kJ/mol     |
| Final entropy term:                                                        | 288.7068 kJ/mol      |
| Final single point energy:                                                 | -9794157.1075 kJ/mol |
| Final enthalpy:                                                            | -9791995.2504 kJ/mol |
| Final Gibbs free enthalpy:                                                 | -9792283.9572 kJ/mol |
| COSMO-RS correction (CH <sub>2</sub> Cl <sub>2</sub> , enthalpy):          | -225.03 kJ/mol       |
| COSMO-RS correction (CH <sub>2</sub> Cl <sub>2</sub> , Gibbs free energy): | -211.94 kJ/mol       |

xyz, charge: -1, multiplicity: 1

|    |           |           |           |
|----|-----------|-----------|-----------|
| N  | -1.715939 | 0.702610  | -0.058000 |
| C  | -1.240228 | 2.816484  | 1.015391  |
| C  | -1.876591 | 4.209235  | 1.168540  |
| H  | -1.143806 | 4.870398  | 1.642580  |
| H  | -2.047322 | 4.622170  | 0.166408  |
| C  | -1.062665 | 2.121125  | 2.396341  |
| H  | -2.049535 | 1.938757  | 2.842786  |
| H  | -0.625498 | 1.133753  | 2.220468  |
| N  | 0.830831  | 1.789797  | -0.007941 |
| C  | 2.046000  | 2.209043  | -0.506921 |
| C  | 0.100435  | 2.917175  | 0.311493  |
| C  | 2.072392  | 3.595913  | -0.522640 |
| H  | 2.887688  | 4.219882  | -0.863085 |
| C  | 0.838847  | 4.046395  | 0.001183  |
| H  | 0.545967  | 5.075726  | 0.157663  |
| C  | 3.098767  | 1.262051  | -1.058004 |
| C  | 2.783228  | 1.062567  | -2.579114 |
| H  | 2.820062  | 2.054651  | -3.050733 |
| H  | 1.748838  | 0.718036  | -2.672908 |
| C  | 4.490711  | 1.930907  | -0.935314 |
| H  | 4.492847  | 2.823092  | -1.575894 |
| H  | 5.233353  | 1.252467  | -1.369404 |
| N  | 1.978214  | -0.757072 | 0.009855  |
| C  | 2.343707  | -1.947411 | 0.605488  |
| C  | 3.125387  | -0.073759 | -0.346892 |
| C  | 3.726722  | -2.028929 | 0.599473  |
| H  | 4.325515  | -2.831167 | 1.009678  |
| C  | 4.218636  | -0.851040 | -0.008915 |
| H  | 5.259117  | -0.606861 | -0.174545 |
| C  | 1.411794  | -2.875392 | 1.359181  |
| C  | 1.899211  | -4.334974 | 1.149380  |
| H  | 1.301584  | -4.994660 | 1.790621  |
| H  | 2.930845  | -4.410903 | 1.514857  |
| C  | 1.550267  | -2.560535 | 2.884783  |
| H  | 2.607182  | -2.679674 | 3.159365  |
| H  | 0.970379  | -3.312536 | 3.438710  |
| N  | -0.668160 | -1.777169 | 0.319764  |
| C  | -2.020779 | -2.062582 | 0.235947  |
| C  | -0.057324 | -2.809438 | 0.995875  |
| C  | -2.261276 | -3.263951 | 0.881349  |
| H  | -3.214290 | -3.773449 | 0.950092  |
| C  | -1.021759 | -3.736026 | 1.364726  |
| H  | -0.857651 | -4.652905 | 1.914840  |
| C  | -3.058523 | -1.313278 | -0.584078 |
| C  | -3.511434 | -2.185898 | -1.798452 |
| H  | -3.987356 | -1.536030 | -2.544719 |
| H  | -4.291317 | -2.863346 | -1.425420 |
| C  | -4.324523 | -1.101992 | 0.298665  |
| H  | -4.695500 | -2.104231 | 0.543405  |
| H  | -5.104728 | -0.631475 | -0.318021 |
| C  | -2.084351 | 1.930578  | 0.134964  |
| C  | -2.532683 | 0.084925  | -1.081010 |
| C  | -3.256873 | 2.242771  | -0.681801 |
| H  | -3.758841 | 3.200046  | -0.730502 |
| C  | -3.546590 | 1.136224  | -1.394462 |
| H  | -4.315909 | 1.023053  | -2.146934 |
| Ga | 0.186845  | -0.093727 | -0.256463 |
| O  | -0.340237 | -0.157185 | -2.132553 |
| C  | -1.603259 | -0.053902 | -2.381080 |
| O  | -2.129711 | -0.056290 | -3.478952 |
| C  | 3.694937  | 0.087349  | -3.320320 |
| H  | 3.344231  | -0.042161 | -4.350395 |
| H  | 4.732534  | 0.437146  | -3.364505 |
| H  | 3.691326  | -0.892541 | -2.831992 |
| C  | 4.925136  | 2.313737  | 0.480043  |
| H  | 5.938870  | 2.732907  | 0.469251  |
| H  | 4.249560  | 3.057728  | 0.911230  |
| H  | 4.921179  | 1.440317  | 1.138253  |
| C  | 1.824270  | -4.812716 | -0.297398 |
| H  | 0.792350  | -4.768571 | -0.660858 |
| H  | 2.439286  | -4.177312 | -0.942672 |
| H  | 2.179291  | -5.846069 | -0.387941 |
| C  | 1.071615  | -1.165206 | 3.269227  |

|   |           |           |           |
|---|-----------|-----------|-----------|
| H | 0.006067  | -1.051405 | 3.037305  |
| H | 1.204338  | -0.985096 | 4.342312  |
| H | 1.630034  | -0.394879 | 2.724336  |
| C | -2.432784 | -3.038183 | -2.467940 |
| H | -2.867710 | -3.575657 | -3.318671 |
| H | -1.598159 | -2.447571 | -2.849880 |
| H | -2.030821 | -3.769186 | -1.760253 |
| C | -4.141635 | -0.331153 | 1.604381  |
| H | -3.253373 | -0.692220 | 2.133095  |
| H | -4.033912 | 0.743535  | 1.441585  |
| H | -5.011848 | -0.483223 | 2.253375  |
| C | -3.171529 | 4.236270  | 1.982371  |
| H | -2.985149 | 4.034871  | 3.042044  |
| H | -3.646398 | 5.221228  | 1.913479  |
| H | -3.896391 | 3.491898  | 1.634079  |
| C | -0.165302 | 2.893621  | 3.356098  |
| H | 0.019871  | 2.301661  | 4.258493  |
| H | 0.798469  | 3.111094  | 2.883635  |
| H | -0.612036 | 3.844969  | 3.666767  |

[E1]

|                                                                            |                      |
|----------------------------------------------------------------------------|----------------------|
| Total correction:                                                          | 2115.313 kJ/mol      |
| Final entropy term:                                                        | 279.5584 kJ/mol      |
| Final single point energy:                                                 | -9299455.5947 kJ/mol |
| Final enthalpy:                                                            | -9297337.8027 kJ/mol |
| Final Gibbs free enthalpy:                                                 | -9297617.3611 kJ/mol |
| COSMO-RS correction (CH <sub>2</sub> Cl <sub>2</sub> , enthalpy):          | -209.14 kJ/mol       |
| COSMO-RS correction (CH <sub>2</sub> Cl <sub>2</sub> , Gibbs free energy): | -199.11 kJ/mol       |

xyz, charge: -1, multiplicity: 1

|   |           |           |           |
|---|-----------|-----------|-----------|
| N | 1.901688  | -0.235062 | -0.092758 |
| C | 2.283303  | 1.907805  | -1.377948 |
| C | 3.475516  | 2.841844  | -1.682175 |
| H | 4.130285  | 2.322830  | -2.395215 |
| H | 3.090753  | 3.722928  | -2.208741 |
| C | 1.618662  | 1.492733  | -2.736119 |
| H | 2.396642  | 1.028420  | -3.358013 |
| H | 0.894033  | 0.693671  | -2.521669 |
| N | 0.186264  | 1.947963  | 0.014885  |
| C | -0.662902 | 2.877426  | 0.589723  |
| C | 1.259672  | 2.623565  | -0.531500 |
| C | -0.120422 | 4.136417  | 0.407720  |
| H | -0.539691 | 5.073545  | 0.748225  |
| C | 1.087198  | 3.976942  | -0.316161 |
| H | 1.736550  | 4.772059  | -0.656427 |
| C | -1.880043 | 2.507012  | 1.404557  |
| C | -1.458945 | 2.290074  | 2.895535  |
| H | -2.377037 | 2.132729  | 3.478894  |
| H | -0.990166 | 3.219458  | 3.247866  |
| C | -2.872564 | 3.698999  | 1.403516  |
| H | -2.363991 | 4.564801  | 1.846985  |
| H | -3.695022 | 3.454083  | 2.087500  |
| N | -1.987438 | 0.273772  | 0.162278  |
| C | -2.932033 | -0.697652 | -0.100149 |
| C | -2.595551 | 1.273493  | 0.901719  |
| C | -4.128261 | -0.330895 | 0.482240  |
| H | -5.060701 | -0.877347 | 0.445272  |
| C | -3.912345 | 0.916598  | 1.123934  |
| H | -4.654484 | 1.498397  | 1.654658  |
| C | -2.549093 | -1.910168 | -0.915034 |
| C | -3.750958 | -2.862615 | -1.073628 |
| H | -4.158090 | -3.052718 | -0.073116 |
| H | -3.379770 | -3.826606 | -1.439869 |
| C | -2.044532 | -1.446154 | -2.315861 |
| H | -1.231226 | -0.720209 | -2.175276 |
| H | -2.847000 | -0.881615 | -2.807307 |
| N | -0.262716 | -1.948788 | 0.099521  |
| C | 0.635345  | -2.859145 | 0.629783  |
| C | -1.428828 | -2.626930 | -0.199544 |
| C | 0.023360  | -4.094758 | 0.697117  |
| H | 0.462616  | -5.009458 | 1.072457  |

|    |           |           |           |
|----|-----------|-----------|-----------|
| C  | -1.283257 | -3.951237 | 0.156917  |
| H  | -2.013751 | -4.738586 | 0.032565  |
| C  | 2.001942  | -2.446836 | 1.127568  |
| C  | 1.816788  | -1.908286 | 2.586719  |
| H  | 1.426571  | -2.735264 | 3.196137  |
| H  | 1.021733  | -1.153589 | 2.561455  |
| C  | 2.935341  | -3.678400 | 1.175533  |
| H  | 2.516045  | -4.385939 | 1.903682  |
| H  | 3.900521  | -3.360583 | 1.587041  |
| C  | 2.772213  | 0.636005  | -0.723156 |
| C  | 2.614453  | -1.364142 | 0.272566  |
| C  | 4.024574  | 0.056571  | -0.766807 |
| H  | 4.914128  | 0.479383  | -1.213891 |
| C  | 3.928558  | -1.201874 | -0.119130 |
| H  | 4.742197  | -1.892677 | 0.055807  |
| Ga | -0.040450 | 0.004339  | 0.046132  |
| C  | -0.510984 | 1.120512  | 3.127528  |
| H  | -0.968606 | 0.180149  | 2.792539  |
| H  | 0.439569  | 1.272137  | 2.601686  |
| H  | -0.278428 | 1.003828  | 4.192199  |
| C  | -3.438200 | 4.071053  | 0.035487  |
| H  | -2.635195 | 4.339906  | -0.657185 |
| H  | -3.987729 | 3.227854  | -0.394059 |
| H  | -4.122701 | 4.923683  | 0.119711  |
| C  | -4.860661 | -2.381040 | -2.012042 |
| H  | -5.159479 | -1.351274 | -1.796497 |
| H  | -4.547528 | -2.423067 | -3.060921 |
| H  | -5.745293 | -3.020480 | -1.911036 |
| C  | -1.534112 | -2.571009 | -3.210552 |
| H  | -1.138581 | -2.167777 | -4.149442 |
| H  | -0.734734 | -3.126221 | -2.708393 |
| H  | -2.327332 | -3.284093 | -3.462061 |
| C  | 3.053591  | -1.292685 | 3.235092  |
| H  | 3.861090  | -2.022374 | 3.359882  |
| H  | 3.439100  | -0.468369 | 2.626560  |
| H  | 2.804117  | -0.901762 | 4.228426  |
| C  | 3.169816  | -4.396963 | -0.154675 |
| H  | 2.231663  | -4.775856 | -0.567968 |
| H  | 3.607265  | -3.723397 | -0.896059 |
| H  | 3.852827  | -5.243677 | -0.013279 |
| C  | 4.295487  | 3.299672  | -0.473747 |
| H  | 5.092163  | 3.982879  | -0.792652 |
| H  | 3.667207  | 3.819850  | 0.253642  |
| H  | 4.753523  | 2.450874  | 0.039528  |
| C  | 0.904074  | 2.605473  | -3.497725 |
| H  | 1.595264  | 3.390983  | -3.821890 |
| H  | 0.419889  | 2.200810  | -4.393887 |
| H  | 0.137925  | 3.071677  | -2.870194 |

C-C bond formation/cleavage transition structure between CO<sub>2</sub> and [Et<sup>-</sup>]

|                                                                            |                      |
|----------------------------------------------------------------------------|----------------------|
| Total correction:                                                          | 2154.8513 kJ/mol     |
| Final entropy term:                                                        | 293.5869 kJ/mol      |
| Final single point energy:                                                 | -9794093.8576 kJ/mol |
| Final enthalpy:                                                            | -9791936.5273 kJ/mol |
| Final Gibbs free enthalpy:                                                 | -9792230.1142 kJ/mol |
| COSMO-RS correction (CH <sub>2</sub> Cl <sub>2</sub> , enthalpy):          | -198.32 kJ/mol       |
| COSMO-RS correction (CH <sub>2</sub> Cl <sub>2</sub> , Gibbs free energy): | -191.13 kJ/mol       |

xyz, charge: -1, multiplicity: 1

|    |           |           |           |
|----|-----------|-----------|-----------|
| Ga | 2.044038  | 7.996140  | 13.021553 |
| O  | 3.264583  | 7.476879  | 11.244518 |
| N  | 3.727382  | 7.546216  | 14.054527 |
| N  | 0.343796  | 8.493036  | 12.185629 |
| N  | 2.594988  | 9.891907  | 13.193043 |
| N  | 1.401503  | 6.118033  | 13.191927 |
| C  | 1.730279  | 10.969251 | 13.272790 |
| C  | -0.519750 | 7.643059  | 11.509090 |
| C  | 1.937998  | 5.135058  | 14.001487 |
| C  | 3.853865  | 10.343440 | 13.560884 |
| C  | 2.877071  | 5.487693  | 15.129376 |
| C  | -0.250858 | 9.743586  | 12.237563 |

|   |           |           |           |
|---|-----------|-----------|-----------|
| C | 3.992339  | 6.298564  | 14.522283 |
| C | 2.132642  | 6.352453  | 16.188125 |
| H | 1.781698  | 7.267462  | 15.700437 |
| H | 2.851993  | 6.683683  | 16.948576 |
| C | -1.467207 | 9.685568  | 11.583009 |
| H | -2.172822 | 10.496202 | 11.464127 |
| C | 4.890035  | 8.046914  | 13.471305 |
| C | 0.545260  | 5.493870  | 12.298246 |
| C | 2.435021  | 12.084062 | 13.690987 |
| H | 2.032797  | 13.074992 | 13.852312 |
| C | 0.565967  | 4.131628  | 12.537204 |
| H | -0.002819 | 3.379399  | 12.007171 |
| C | 3.778402  | 11.688642 | 13.866979 |
| H | 4.605863  | 12.329603 | 14.141703 |
| C | 4.455969  | 7.377251  | 11.174541 |
| C | 1.443506  | 3.903631  | 13.623275 |
| H | 1.667920  | 2.949257  | 14.078855 |
| C | -0.226127 | 6.195494  | 11.200090 |
| C | 0.236286  | 10.895818 | 13.081200 |
| C | -1.631421 | 8.364334  | 11.116393 |
| H | -2.475809 | 7.987937  | 10.555781 |
| C | 5.885756  | 7.062034  | 13.596797 |
| H | 6.913305  | 7.159253  | 13.268008 |
| C | 5.321779  | 5.962248  | 14.254835 |
| H | 5.812995  | 5.028600  | 14.491288 |
| C | -1.568941 | 5.443995  | 10.987608 |
| H | -1.332705 | 4.432345  | 10.633012 |
| H | -2.110306 | 5.925342  | 10.166632 |
| C | 5.130532  | 9.548661  | 13.448390 |
| C | -0.444784 | 10.807139 | 14.488271 |
| H | -1.532530 | 10.807855 | 14.333228 |
| H | -0.180979 | 11.719515 | 15.041948 |
| C | 0.604598  | 6.068885  | 9.877307  |
| H | 0.773379  | 4.997263  | 9.703256  |
| H | 1.588030  | 6.509561  | 10.057057 |
| C | 3.427955  | 4.200517  | 15.771592 |
| H | 2.581461  | 3.552955  | 16.026209 |
| H | 4.001770  | 3.659469  | 15.009461 |
| C | -0.247185 | 12.225337 | 12.441796 |
| H | 0.014169  | 13.045435 | 13.121345 |
| H | -1.343310 | 12.210039 | 12.404191 |
| C | 6.023271  | 9.861543  | 14.692166 |
| H | 6.181366  | 10.946900 | 14.734713 |
| H | 7.007934  | 9.406668  | 14.513598 |
| C | 5.945459  | 10.004955 | 12.195277 |
| H | 6.638978  | 9.200666  | 11.916735 |
| H | 6.568464  | 10.857366 | 12.498851 |
| O | 5.470826  | 7.173770  | 10.624024 |
| C | 5.122327  | 10.442211 | 10.984042 |
| H | 5.775579  | 10.613241 | 10.120828 |
| H | 4.366795  | 9.710241  | 10.688013 |
| H | 4.581469  | 11.366874 | 11.206424 |
| C | 4.283917  | 4.414625  | 17.020958 |
| H | 3.681834  | 4.761360  | 17.867470 |
| H | 4.760945  | 3.474821  | 17.321678 |
| H | 5.071863  | 5.155149  | 16.849224 |
| C | 0.938975  | 5.655099  | 16.831889 |
| H | 0.250328  | 5.292106  | 16.061224 |
| H | 1.241247  | 4.797796  | 17.444339 |
| H | 0.394609  | 6.350745  | 17.479883 |
| C | -0.006846 | 6.716346  | 8.636352  |
| H | 0.691239  | 6.646933  | 7.793988  |
| H | -0.939245 | 6.229115  | 8.331028  |
| H | -0.222913 | 7.774300  | 8.817165  |
| C | -2.478964 | 5.363256  | 12.211871 |
| H | -3.410369 | 4.839440  | 11.964101 |
| H | -1.987629 | 4.825838  | 13.028237 |
| H | -2.733666 | 6.364656  | 12.571591 |
| C | -0.043970 | 9.588186  | 15.310862 |
| H | -0.325430 | 8.657004  | 14.804468 |
| H | 1.038148  | 9.583948  | 15.490201 |
| H | -0.540188 | 9.594649  | 16.288236 |
| C | 0.318402  | 12.506822 | 11.052866 |



|   |           |           |           |
|---|-----------|-----------|-----------|
| H | 1.411465  | 12.554332 | 11.088460 |
| H | 0.035507  | 11.714338 | 10.353167 |
| H | -0.056861 | 13.461671 | 10.665681 |
| C | 5.458367  | 9.372141  | 16.020763 |
| H | 4.444443  | 9.758412  | 16.168952 |
| H | 5.414143  | 8.278778  | 16.055194 |
| H | 6.083679  | 9.715377  | 16.853352 |

**[Me1(AI)-F]2-**

|                                                                            |                      |
|----------------------------------------------------------------------------|----------------------|
| Total correction:                                                          | 1497.7336 kJ/mol     |
| Final entropy term:                                                        | 224.3199 kJ/mol      |
| Final single point energy:                                                 | -4321015.6096 kJ/mol |
| Final enthalpy:                                                            | -4319515.397 kJ/mol  |
| Final Gibbs free enthalpy:                                                 | -4319739.7169 kJ/mol |
| COSMO-RS correction (CH <sub>2</sub> Cl <sub>2</sub> , enthalpy):          | -627.36 kJ/mol       |
| COSMO-RS correction (CH <sub>2</sub> Cl <sub>2</sub> , Gibbs free energy): | -597.38 kJ/mol       |

xyz, charge: -2, multiplicity: 1

|   |           |           |           |
|---|-----------|-----------|-----------|
| N | -0.275580 | -2.249291 | 0.227659  |
| C | -0.808187 | -3.318247 | 0.920913  |
| C | 0.261339  | -2.751327 | -0.935184 |
| C | -0.626305 | -4.482625 | 0.188555  |
| H | -0.935917 | -5.480024 | 0.472572  |
| C | 0.062981  | -4.121421 | -0.996500 |
| H | 0.387027  | -4.788895 | -1.784716 |
| N | -0.242362 | -0.978070 | 2.611141  |
| C | 0.324155  | -0.298196 | 3.664412  |
| C | -0.776872 | -2.143801 | 3.123955  |
| C | 0.143624  | -1.009126 | 4.840097  |
| C | -0.565746 | -2.187010 | 4.494540  |
| H | -0.869678 | -2.975169 | 5.171110  |
| N | -0.027546 | 1.480438  | 1.296877  |
| C | -0.358810 | 2.613691  | 0.580064  |
| C | 0.517293  | 1.902609  | 2.487290  |
| C | -0.043653 | 3.741426  | 1.324078  |
| H | -0.185730 | 4.772541  | 1.027334  |
| C | 0.522258  | 3.287295  | 2.542000  |
| H | 0.900862  | 3.902716  | 3.348063  |
| N | -0.059088 | 0.208972  | -1.086240 |
| C | 0.455524  | -0.550729 | -2.111008 |
| C | -0.391830 | 1.437598  | -1.621956 |
| C | 0.440003  | 0.173397  | -3.292361 |
| H | 0.793159  | -0.157671 | -4.260577 |
| C | -0.107516 | 1.443265  | -2.979933 |
| H | -0.257944 | 2.264371  | -3.668783 |
| H | 0.418581  | -2.815817 | -3.694415 |
| C | 1.358514  | -2.618460 | -3.168421 |
| C | 2.473006  | -1.646235 | -1.162878 |
| C | 1.098791  | -1.888432 | -1.845038 |
| H | 2.971635  | -2.603079 | -0.959722 |
| H | 1.864502  | -3.572113 | -2.981492 |
| H | 2.334180  | -1.127010 | -0.210526 |
| H | -3.113027 | -1.874941 | 1.601953  |
| C | -2.989104 | -2.832697 | 2.107479  |
| C | -1.426025 | -4.537581 | 2.993592  |
| C | -1.484254 | -3.178319 | 2.270629  |
| H | -0.390732 | -4.857438 | 3.149011  |
| H | -3.481591 | -3.615823 | 1.515166  |
| H | -1.948207 | -5.299540 | 2.404493  |
| H | 2.369791  | -0.008138 | 1.869269  |
| C | 2.528853  | 0.487252  | 2.831134  |
| C | 1.461526  | 1.620492  | 4.775896  |
| C | 1.169082  | 0.930148  | 3.438150  |
| H | 1.978443  | 0.931282  | 5.452979  |
| H | 3.031691  | -0.222075 | 3.501519  |
| H | 0.533679  | 1.952865  | 5.253173  |
| C | -0.979869 | 2.569369  | -0.802261 |
| C | -2.525143 | 2.451149  | -0.714214 |
| C | -0.684139 | 3.901205  | -1.518422 |
| H | -2.952838 | 2.462149  | -1.726052 |
| H | -1.142842 | 3.903298  | -2.513215 |

|    |           |           |           |
|----|-----------|-----------|-----------|
| H  | -2.813535 | 1.524514  | -0.217732 |
| H  | 0.393667  | 4.060255  | -1.624253 |
| H  | -2.925497 | 3.300723  | -0.144541 |
| H  | -1.112920 | 4.736177  | -0.953563 |
| H  | 3.111475  | -1.022016 | -1.801674 |
| H  | 2.003430  | -2.012779 | -3.814752 |
| H  | -1.926624 | -4.470037 | 3.965790  |
| H  | -3.462048 | -2.778897 | 3.097466  |
| H  | 2.107804  | 2.490886  | 4.617778  |
| H  | 3.172633  | 1.360478  | 2.662675  |
| H  | 0.491741  | -0.729937 | 5.826343  |
| Al | -0.550865 | -0.354351 | 0.752231  |
| F  | -2.267535 | -0.228664 | 0.706682  |

[Me<sub>1</sub>-F]<sup>2-</sup>

|                                                                            |                      |
|----------------------------------------------------------------------------|----------------------|
| Total correction:                                                          | 1495.2033 kJ/mol     |
| Final entropy term:                                                        | 228.5276 kJ/mol      |
| Final single point energy:                                                 | -8736930.021 kJ/mol  |
| Final enthalpy:                                                            | -8735432.3387 kJ/mol |
| Final Gibbs free enthalpy:                                                 | -8735660.8663 kJ/mol |
| COSMO-RS correction (CH <sub>2</sub> Cl <sub>2</sub> , enthalpy):          | -627.87 kJ/mol       |
| COSMO-RS correction (CH <sub>2</sub> Cl <sub>2</sub> , Gibbs free energy): | -597.73 kJ/mol       |
| COSMO-RS correction (MeCN, Gibbs free energy):                             | -616.80 kJ/mol       |

xyz, charge: -2, multiplicity: 1

|   |           |           |           |
|---|-----------|-----------|-----------|
| N | -0.281186 | -2.289109 | 0.219082  |
| C | -0.779816 | -3.357406 | 0.932003  |
| C | 0.229404  | -2.774621 | -0.960211 |
| C | -0.600197 | -4.519622 | 0.193676  |
| H | -0.886930 | -5.521830 | 0.484943  |
| C | 0.049154  | -4.148982 | -1.011466 |
| H | 0.360768  | -4.814995 | -1.805997 |
| N | -0.246949 | -0.993182 | 2.648726  |
| C | 0.293619  | -0.290350 | 3.697938  |
| C | -0.747990 | -2.175309 | 3.149195  |
| C | 0.131204  | -1.012378 | 4.871114  |
| C | -0.538663 | -2.212497 | 4.521308  |
| H | -0.819600 | -3.009617 | 5.197428  |
| N | -0.027505 | 1.520109  | 1.305287  |
| C | -0.324530 | 2.647430  | 0.570465  |
| C | 0.487957  | 1.929952  | 2.510753  |
| C | -0.012106 | 3.773426  | 1.320272  |
| H | -0.130337 | 4.805862  | 1.017485  |
| C | 0.511619  | 3.316160  | 2.556297  |
| H | 0.877419  | 3.932150  | 3.367909  |
| N | -0.060498 | 0.223884  | -1.124218 |
| C | 0.424376  | -0.554991 | -2.146500 |
| C | -0.359000 | 1.463630  | -1.646036 |
| C | 0.426845  | 0.176977  | -3.324690 |
| H | 0.766476  | -0.158655 | -4.296242 |
| C | -0.078405 | 1.463243  | -3.005890 |
| H | -0.205755 | 2.289723  | -3.693068 |
| H | 0.346183  | -2.826141 | -3.723622 |
| C | 1.292797  | -2.633870 | -3.207729 |
| C | 2.434852  | -1.669207 | -1.213064 |
| C | 1.051554  | -1.903475 | -1.880722 |
| H | 2.930145  | -2.629410 | -1.017934 |
| H | 1.795981  | -3.589991 | -3.027044 |
| H | 2.309427  | -1.151143 | -0.258020 |
| H | -3.073085 | -1.916445 | 1.620295  |
| C | -2.947906 | -2.873843 | 2.128482  |
| C | -1.373977 | -4.574558 | 3.012447  |
| C | -1.442452 | -3.216132 | 2.290024  |
| H | -0.336423 | -4.888844 | 3.165334  |
| H | -3.439979 | -3.658583 | 1.537971  |
| H | -1.893075 | -5.339180 | 2.424290  |
| H | 2.348748  | 0.020273  | 1.917008  |
| C | 2.493167  | 0.517303  | 2.880506  |
| C | 1.395379  | 1.645293  | 4.812411  |
| C | 1.123035  | 0.951916  | 3.471618  |
| H | 1.908882  | 0.960018  | 5.495750  |

|    |           |           |           |
|----|-----------|-----------|-----------|
| H  | 2.992239  | -0.188061 | 3.557790  |
| H  | 0.459966  | 1.972018  | 5.278770  |
| C  | -0.932365 | 2.600208  | -0.819508 |
| C  | -2.477965 | 2.487693  | -0.733721 |
| C  | -0.624801 | 3.929306  | -1.534655 |
| H  | -2.904371 | 2.500074  | -1.746087 |
| H  | -1.079855 | 3.933825  | -2.530978 |
| H  | -2.769992 | 1.560719  | -0.237625 |
| H  | 0.454517  | 4.081395  | -1.636985 |
| H  | -2.876214 | 3.337883  | -0.163501 |
| H  | -1.049748 | 4.767136  | -0.971349 |
| H  | 3.068657  | -1.047162 | -1.858519 |
| H  | 1.933663  | -2.031009 | -3.860360 |
| H  | -1.872317 | -4.509818 | 3.985872  |
| H  | -3.419723 | -2.817639 | 3.118860  |
| H  | 2.037937  | 2.519398  | 4.661157  |
| H  | 3.132336  | 1.395280  | 2.719664  |
| H  | 0.467009  | -0.727164 | 5.859958  |
| Ga | -0.562016 | -0.353541 | 0.752045  |
| F  | -2.387891 | -0.218946 | 0.705247  |

(CH<sub>3</sub>)<sub>3</sub>SiF

|                                                                            |                      |
|----------------------------------------------------------------------------|----------------------|
| Total correction:                                                          | 318.1492 kJ/mol      |
| Final entropy term:                                                        | 107.9297 kJ/mol      |
| Final single point energy:                                                 | -1335564.7624 kJ/mol |
| Final enthalpy:                                                            | -1335244.1342 kJ/mol |
| Final Gibbs free enthalpy:                                                 | -1335352.0639 kJ/mol |
| COSMO-RS correction (CH <sub>2</sub> Cl <sub>2</sub> , enthalpy):          | -25.15 kJ/mol        |
| COSMO-RS correction (CH <sub>2</sub> Cl <sub>2</sub> , Gibbs free energy): | -18.37 kJ/mol        |

xyz, charge: 0, multiplicity: 1

|    |           |           |           |
|----|-----------|-----------|-----------|
| C  | -5.642239 | 3.687375  | -0.530028 |
| Si | -5.671513 | 2.051753  | 0.368791  |
| H  | -4.614951 | 4.002335  | -0.742713 |
| H  | -6.118826 | 4.473277  | 0.065811  |
| H  | -6.176497 | 3.620442  | -1.484709 |
| C  | -7.410243 | 1.540490  | 0.815579  |
| H  | -7.902916 | 2.307397  | 1.422973  |
| H  | -7.412011 | 0.605938  | 1.386926  |
| H  | -8.017058 | 1.384398  | -0.083680 |
| C  | -4.785190 | 0.719337  | -0.591992 |
| H  | -5.284747 | 0.526555  | -1.548321 |
| H  | -4.761257 | -0.221323 | -0.031271 |
| H  | -3.751059 | 1.009483  | -0.806893 |
| F  | -4.861674 | 2.256250  | 1.759516  |

[Ga(pyrrolato)<sub>4</sub>]<sup>-</sup>

|                                                                            |                      |
|----------------------------------------------------------------------------|----------------------|
| Total correction:                                                          | 802.053 kJ/mol       |
| Final entropy term:                                                        | 182.1274 kJ/mol      |
| Final single point energy:                                                 | -7250598.4355 kJ/mol |
| Final enthalpy:                                                            | -7249793.9035 kJ/mol |
| Final Gibbs free enthalpy:                                                 | -7249976.0309 kJ/mol |
| COSMO-RS correction (CH <sub>2</sub> Cl <sub>2</sub> , enthalpy):          | -203.76 kJ/mol       |
| COSMO-RS correction (CH <sub>2</sub> Cl <sub>2</sub> , Gibbs free energy): | -188.09 kJ/mol       |

xyz, charge: -1, multiplicity: 1

|    |           |           |           |
|----|-----------|-----------|-----------|
| Ga | -1.892794 | -1.204080 | 0.247673  |
| N  | -1.764846 | 0.605904  | 0.849135  |
| N  | -3.577685 | -1.384546 | -0.637065 |
| N  | -0.455860 | -1.626493 | -0.940365 |
| N  | -1.772806 | -2.413628 | 1.723538  |
| C  | -4.145728 | -0.467392 | -1.490819 |
| C  | -4.383474 | -2.498284 | -0.624365 |
| C  | -5.461967 | -2.291629 | -1.461593 |
| C  | -5.309902 | -0.992444 | -2.016194 |
| H  | -5.976398 | -0.497280 | -2.710035 |
| H  | -3.684366 | 0.500283  | -1.643332 |
| H  | -4.131052 | -3.349893 | -0.004950 |
| H  | -6.268511 | -2.988770 | -1.646345 |

|   |           |           |           |
|---|-----------|-----------|-----------|
| C | -2.780077 | 1.344483  | 1.411523  |
| C | -0.615899 | 1.358050  | 0.913465  |
| C | -2.281532 | 2.563265  | 1.827686  |
| C | -0.897023 | 2.571837  | 1.508739  |
| H | -3.787576 | 0.950019  | 1.454444  |
| H | -2.847420 | 3.356801  | 2.297634  |
| H | -0.192291 | 3.373494  | 1.685829  |
| H | 0.314247  | 0.972385  | 0.515043  |
| C | 0.829569  | -1.947364 | -0.569361 |
| C | -0.488011 | -1.551404 | -2.312650 |
| C | 0.768265  | -1.827184 | -2.815029 |
| C | 1.611451  | -2.080207 | -1.699869 |
| C | -1.482728 | -3.756246 | 1.644777  |
| C | -2.082390 | -2.129619 | 3.032563  |
| C | -1.602305 | -4.323714 | 2.897959  |
| C | -1.985512 | -3.282821 | 3.785778  |
| H | -1.194586 | -4.201619 | 0.700750  |
| H | -1.426550 | -5.361889 | 3.147140  |
| H | -2.335333 | -1.119382 | 3.329275  |
| H | -2.161261 | -3.365703 | 4.850150  |
| H | -1.412143 | -1.319896 | -2.827403 |
| H | 1.045367  | -1.852287 | -3.860602 |
| H | 1.083809  | -2.075930 | 0.475303  |
| H | 2.662228  | -2.337469 | -1.721699 |

[(CH<sub>3</sub>)<sub>3</sub>Si]<sup>+</sup>

|                                                                            |                      |
|----------------------------------------------------------------------------|----------------------|
| Total correction:                                                          | 305.1236 kJ/mol      |
| Final entropy term:                                                        | 105.7794 kJ/mol      |
| Final single point energy:                                                 | -1072644.0722 kJ/mol |
| Final enthalpy:                                                            | -1072336.4696 kJ/mol |
| Final Gibbs free enthalpy:                                                 | -1072442.249 kJ/mol  |
| COSMO-RS correction (CH <sub>2</sub> Cl <sub>2</sub> , enthalpy):          | -242.78 kJ/mol       |
| COSMO-RS correction (CH <sub>2</sub> Cl <sub>2</sub> , Gibbs free energy): | -226.40 kJ/mol       |

xyz, charge: 1, multiplicity: 1

|    |           |           |           |
|----|-----------|-----------|-----------|
| C  | -5.666800 | 3.729659  | -0.565179 |
| Si | -5.966278 | 1.978068  | -0.138811 |
| H  | -4.766510 | 4.076462  | -0.034370 |
| H  | -6.500850 | 4.384755  | -0.300888 |
| H  | -5.439680 | 3.831731  | -1.634764 |
| C  | -7.457745 | 1.510707  | 0.808541  |
| H  | -7.591877 | 2.175029  | 1.672157  |
| H  | -7.448413 | 0.469096  | 1.139670  |
| H  | -8.342818 | 1.664962  | 0.171418  |
| C  | -4.775268 | 0.693119  | -0.658519 |
| H  | -5.294126 | -0.083353 | -1.238933 |
| H  | -4.375136 | 0.181456  | 0.229180  |
| H  | -3.944889 | 1.090263  | -1.247703 |

[Ga(pyrrolato)<sub>4</sub>]<sup>-</sup> (square planar configuration)

|                            |                      |
|----------------------------|----------------------|
| Total correction:          | 799.4109 kJ/mol      |
| Final entropy term:        | 171.5899 kJ/mol      |
| Final single point energy: | -7250432.5802 kJ/mol |
| Final enthalpy:            | -7249630.6904 kJ/mol |
| Final Gibbs free enthalpy: | -7249802.2803 kJ/mol |

xyz, charge: -1, multiplicity: 1

|    |           |           |           |
|----|-----------|-----------|-----------|
| Ga | -1.900395 | -1.195733 | 0.248885  |
| N  | -0.715414 | 0.072300  | 1.191045  |
| N  | -3.085355 | -2.463743 | -0.693258 |
| N  | -1.064199 | -0.702071 | -1.468806 |
| N  | -2.736660 | -1.689436 | 1.966716  |
| C  | -3.707632 | -2.257971 | -1.906172 |
| C  | -3.444773 | -3.722037 | -0.259351 |
| C  | -4.279953 | -4.310258 | -1.185719 |
| C  | -4.456542 | -3.367679 | -2.236538 |
| H  | -5.059419 | -3.486397 | -3.127481 |
| H  | -3.548078 | -1.341746 | -2.458473 |
| H  | -3.098481 | -4.096166 | 0.694629  |

|   |           |           |           |
|---|-----------|-----------|-----------|
| H | -4.711542 | -5.300287 | -1.115636 |
| C | -1.069400 | 0.908396  | 2.228443  |
| C | 0.622013  | 0.286284  | 0.933584  |
| C | 0.026266  | 1.647506  | 2.621918  |
| C | 1.113095  | 1.241280  | 1.798639  |
| H | -2.074463 | 0.895371  | 2.627957  |
| H | 0.043144  | 2.391788  | 3.407460  |
| H | 2.132201  | 1.603833  | 1.834575  |
| H | 1.120006  | -0.241771 | 0.131674  |
| C | -0.686966 | 0.564622  | -1.861610 |
| C | -0.744558 | -1.560429 | -2.499457 |
| C | -0.167595 | -0.850263 | -3.531137 |
| C | -0.139859 | 0.513252  | -3.126385 |
| C | -4.077495 | -1.924796 | 2.185566  |
| C | -2.090236 | -1.864011 | 3.171991  |
| C | -4.281600 | -2.239756 | 3.512492  |
| C | -3.006440 | -2.210720 | 4.142584  |
| H | -4.785597 | -1.876424 | 1.369420  |
| H | -5.234493 | -2.463599 | 3.974275  |
| H | -1.024205 | -1.700624 | 3.253979  |
| H | -2.785073 | -2.418727 | 5.181373  |
| H | -0.977893 | -2.614323 | -2.430923 |
| H | 0.191945  | -1.262997 | -4.464804 |
| H | -0.812660 | 1.408129  | -1.196397 |
| H | 0.234717  | 1.356193  | -3.692515 |

[H-Me1\*]

|                                                                            |                      |
|----------------------------------------------------------------------------|----------------------|
| Total correction:                                                          | 1525.3991 kJ/mol     |
| Final entropy term:                                                        | 222.2992 kJ/mol      |
| Final single point energy:                                                 | -8476188.4437 kJ/mol |
| Final enthalpy:                                                            | -8474660.5656 kJ/mol |
| Final Gibbs free enthalpy:                                                 | -8474882.8648 kJ/mol |
| COSMO-RS correction (CH <sub>2</sub> Cl <sub>2</sub> , enthalpy):          | -96.39 kJ/mol        |
| COSMO-RS correction (CH <sub>2</sub> Cl <sub>2</sub> , Gibbs free energy): | -83.77 kJ/mol        |

xyz, charge: 0, multiplicity: 1

|   |           |           |           |
|---|-----------|-----------|-----------|
| N | 1.187635  | -2.102603 | 2.205296  |
| C | 2.703864  | -1.331381 | 4.059692  |
| C | 3.081413  | -1.785765 | 5.473843  |
| H | 3.594662  | -2.750238 | 5.432685  |
| H | 2.192191  | -1.889726 | 6.102466  |
| H | 3.763683  | -1.068054 | 5.939300  |
| C | 4.012992  | -1.195126 | 3.233075  |
| H | 4.536180  | -2.156389 | 3.200203  |
| H | 4.666699  | -0.435662 | 3.676705  |
| H | 3.800281  | -0.901179 | 2.198043  |
| N | 1.378716  | 0.575666  | 3.030284  |
| C | 0.913814  | 1.826092  | 3.407397  |
| C | 2.031423  | 0.018749  | 4.123524  |
| C | 1.297415  | 2.070143  | 4.708120  |
| H | 1.069581  | 2.949653  | 5.293429  |
| C | 2.007394  | 0.927994  | 5.158137  |
| H | 2.444299  | 0.795006  | 6.136986  |
| C | -0.116350 | 2.578413  | 2.596671  |
| C | -1.502904 | 1.897577  | 2.752665  |
| H | -1.800176 | 1.945620  | 3.803924  |
| H | -1.461186 | 0.844364  | 2.459512  |
| H | -2.262094 | 2.398552  | 2.139982  |
| C | -0.229745 | 4.027227  | 3.085862  |
| H | -0.993056 | 4.571152  | 2.519917  |
| H | 0.726018  | 4.553922  | 3.004438  |
| H | -0.533579 | 4.036453  | 4.134760  |
| N | 0.440041  | 1.402537  | 0.508544  |
| C | 0.717134  | 1.694708  | -0.907642 |
| C | 0.245969  | 2.533611  | 1.137686  |
| C | 0.658848  | 3.176841  | -0.981852 |
| H | 0.796503  | 3.742068  | -1.894749 |
| C | 0.374366  | 3.667801  | 0.237763  |
| H | 0.252960  | 4.704983  | 0.517018  |
| C | 2.028374  | 1.005482  | -1.448157 |
| C | 2.303295  | 1.521634  | -2.864219 |

|    |           |           |           |
|----|-----------|-----------|-----------|
| H  | 2.607622  | 2.572409  | -2.850226 |
| H  | 1.427386  | 1.409716  | -3.512116 |
| H  | 3.121917  | 0.946478  | -3.305846 |
| C  | 3.223946  | 1.360596  | -0.549086 |
| H  | 4.132104  | 0.916123  | -0.966477 |
| H  | 3.120702  | 0.980652  | 0.474001  |
| H  | 3.362186  | 2.446152  | -0.481494 |
| N  | 1.224249  | -1.090790 | -0.370722 |
| C  | 0.914403  | -2.398124 | -0.700612 |
| C  | 1.744533  | -0.468100 | -1.487609 |
| C  | 1.251145  | -2.599300 | -2.023532 |
| H  | 1.123294  | -3.514286 | -2.584325 |
| C  | 1.776154  | -1.375594 | -2.525130 |
| H  | 2.126451  | -1.196184 | -3.532025 |
| C  | 0.144505  | -3.282870 | 0.263156  |
| C  | -1.299499 | -2.730936 | 0.391814  |
| H  | -1.789421 | -2.705898 | -0.587945 |
| H  | -1.307883 | -1.708988 | 0.793842  |
| H  | -1.881435 | -3.357652 | 1.076018  |
| C  | 0.061540  | -4.707914 | -0.289518 |
| H  | -0.452112 | -4.712877 | -1.255838 |
| H  | -0.504434 | -5.344870 | 0.396857  |
| H  | 1.060245  | -5.135207 | -0.418987 |
| C  | 1.841786  | -2.383356 | 3.392815  |
| C  | 0.809504  | -3.292897 | 1.617604  |
| C  | 1.833441  | -3.750594 | 3.573386  |
| H  | 2.285370  | -4.293602 | 4.391548  |
| C  | 1.171865  | -4.327194 | 2.451283  |
| H  | 1.005944  | -5.381398 | 2.278970  |
| Ga | 1.055309  | -0.382707 | 1.401043  |
| H  | -0.105241 | 1.267206  | -1.505774 |

[H-Me1\*-F]-

|                                                                            |                      |
|----------------------------------------------------------------------------|----------------------|
| Total correction:                                                          | 1532.4477 kJ/mol     |
| Final entropy term:                                                        | 228.558 kJ/mol       |
| Final single point energy:                                                 | -8738534.5514 kJ/mol |
| Final enthalpy:                                                            | -8736999.6248 kJ/mol |
| Final Gibbs free enthalpy:                                                 | -8737228.1828 kJ/mol |
| COSMO-RS correction (CH <sub>2</sub> Cl <sub>2</sub> , enthalpy):          | -244.91 kJ/mol       |
| COSMO-RS correction (CH <sub>2</sub> Cl <sub>2</sub> , Gibbs free energy): | -225.28 kJ/mol       |

xyz, charge: -1, multiplicity: 1

|   |           |           |           |
|---|-----------|-----------|-----------|
| N | 1.152201  | -2.191795 | 2.175602  |
| C | 2.610616  | -1.361130 | 4.028267  |
| C | 3.028713  | -1.819386 | 5.431137  |
| H | 3.565457  | -2.770526 | 5.367807  |
| H | 2.153480  | -1.953154 | 6.074672  |
| H | 3.700242  | -1.088637 | 5.893274  |
| C | 3.903158  | -1.160803 | 3.187151  |
| H | 4.467325  | -2.099565 | 3.136346  |
| H | 4.529402  | -0.376693 | 3.630995  |
| H | 3.649444  | -0.866952 | 2.163816  |
| N | 1.225712  | 0.549178  | 3.058655  |
| C | 0.854932  | 1.823669  | 3.455370  |
| C | 1.904320  | -0.026811 | 4.118575  |
| C | 1.301504  | 2.049570  | 4.745238  |
| H | 1.167431  | 2.948121  | 5.331193  |
| C | 1.966312  | 0.875413  | 5.164712  |
| H | 2.444998  | 0.719441  | 6.120842  |
| C | -0.018521 | 2.761623  | 2.646946  |
| C | -1.523500 | 2.428839  | 2.844175  |
| H | -1.768827 | 2.563308  | 3.903008  |
| H | -1.727500 | 1.396044  | 2.554054  |
| H | -2.151225 | 3.103395  | 2.245839  |
| C | 0.208034  | 4.210255  | 3.112740  |
| H | -0.465473 | 4.895872  | 2.587024  |
| H | 1.244508  | 4.527987  | 2.957241  |
| H | -0.018016 | 4.291978  | 4.177941  |
| N | 0.405025  | 1.513997  | 0.563068  |
| C | 0.611064  | 1.760013  | -0.857981 |
| C | 0.268144  | 2.650511  | 1.172223  |

|    |           |           |           |
|----|-----------|-----------|-----------|
| C  | 0.578097  | 3.244400  | -0.987964 |
| H  | 0.683719  | 3.782509  | -1.921592 |
| C  | 0.361064  | 3.769528  | 0.228533  |
| H  | 0.272929  | 4.817167  | 0.482469  |
| C  | 1.886253  | 1.017753  | -1.381291 |
| C  | 2.194683  | 1.515483  | -2.798450 |
| H  | 2.511863  | 2.563507  | -2.782305 |
| H  | 1.327000  | 1.411668  | -3.459821 |
| H  | 3.013094  | 0.927732  | -3.223389 |
| C  | 3.087960  | 1.339802  | -0.474407 |
| H  | 3.987116  | 0.879479  | -0.896259 |
| H  | 2.953768  | 0.946258  | 0.536554  |
| H  | 3.248463  | 2.423324  | -0.397617 |
| N  | 0.986614  | -1.101816 | -0.342543 |
| C  | 0.838449  | -2.431721 | -0.693361 |
| C  | 1.576298  | -0.455000 | -1.409292 |
| C  | 1.319944  | -2.614038 | -1.978677 |
| H  | 1.343508  | -3.543638 | -2.529590 |
| C  | 1.787924  | -1.358451 | -2.436334 |
| H  | 2.225985  | -1.152494 | -3.403508 |
| C  | 0.197570  | -3.465718 | 0.217952  |
| C  | -1.338462 | -3.263738 | 0.267861  |
| H  | -1.754719 | -3.338002 | -0.745057 |
| H  | -1.603452 | -2.292491 | 0.687844  |
| H  | -1.786337 | -4.043558 | 0.896017  |
| C  | 0.446774  | -4.866766 | -0.361398 |
| H  | -0.007012 | -4.952797 | -1.354511 |
| H  | -0.016424 | -5.620822 | 0.282814  |
| H  | 1.517249  | -5.081226 | -0.437139 |
| C  | 1.799760  | -2.445763 | 3.359208  |
| C  | 0.816124  | -3.394814 | 1.600053  |
| C  | 1.846669  | -3.815995 | 3.561136  |
| H  | 2.312286  | -4.334616 | 4.388385  |
| C  | 1.215722  | -4.419800 | 2.441873  |
| H  | 1.100036  | -5.481194 | 2.268207  |
| Ga | 0.532791  | -0.457586 | 1.491289  |
| H  | -0.240815 | 1.322095  | -1.405793 |
| F  | -1.278233 | -0.470086 | 1.681184  |

[<sup>Et</sup>1-F]<sup>2-</sup>

|                                                                            |                      |
|----------------------------------------------------------------------------|----------------------|
| Total correction:                                                          | 2118.6879 kJ/mol     |
| Final entropy term:                                                        | 286.6686 kJ/mol      |
| Final single point energy:                                                 | -9561504.9524 kJ/mol |
| Final enthalpy:                                                            | -9559383.7855 kJ/mol |
| Final Gibbs free enthalpy:                                                 | -9559670.4541 kJ/mol |
| COSMO-RS correction (CH <sub>2</sub> Cl <sub>2</sub> , enthalpy):          | -591.91 kJ/mol       |
| COSMO-RS correction (CH <sub>2</sub> Cl <sub>2</sub> , Gibbs free energy): | -568.99 kJ/mol       |

xyz, charge: -2, multiplicity: 1

|   |           |           |           |
|---|-----------|-----------|-----------|
| N | 1.542167  | 1.293756  | -0.091926 |
| C | 0.204158  | 3.212862  | 0.794157  |
| C | 0.155201  | 2.595593  | 2.225150  |
| H | 0.160039  | 1.508213  | 2.114257  |
| H | 1.085577  | 2.846273  | 2.753154  |
| C | 0.290362  | 4.751233  | 0.879803  |
| H | 0.476606  | 5.130217  | -0.132751 |
| H | -0.691880 | 5.136972  | 1.177388  |
| N | -1.338884 | 1.488604  | -0.153170 |
| C | -2.604822 | 1.419437  | -0.692305 |
| C | -1.055380 | 2.817540  | 0.061060  |
| C | -3.105376 | 2.703638  | -0.851297 |
| H | -4.081494 | 2.972832  | -1.236241 |
| C | -2.121163 | 3.596646  | -0.358707 |
| H | -2.201445 | 4.674580  | -0.305488 |
| C | -3.306795 | 0.120661  | -1.035030 |
| C | -4.831539 | 0.312181  | -0.806354 |
| H | -5.345776 | -0.614162 | -1.087793 |
| H | -5.178872 | 1.076174  | -1.515356 |
| C | -3.080548 | -0.166982 | -2.557468 |
| H | -2.000317 | -0.179367 | -2.727049 |
| H | -3.483159 | 0.693883  | -3.111705 |

|    |           |           |           |
|----|-----------|-----------|-----------|
| N  | -1.500036 | -1.272618 | 0.125530  |
| C  | -1.436416 | -2.464524 | 0.810632  |
| C  | -2.824106 | -1.044547 | -0.196863 |
| C  | -2.716050 | -2.992741 | 0.928172  |
| H  | -2.993768 | -3.915706 | 1.421226  |
| C  | -3.592765 | -2.097144 | 0.280679  |
| H  | -4.662493 | -2.218839 | 0.169916  |
| C  | -0.199505 | -3.037362 | 1.465657  |
| C  | -0.213903 | -2.650386 | 2.980654  |
| H  | 0.633580  | -3.158037 | 3.465367  |
| H  | -1.143021 | -3.043710 | 3.419612  |
| C  | -0.284332 | -4.588737 | 1.405491  |
| H  | -1.192025 | -4.906699 | 1.934563  |
| H  | 0.557959  | -5.001864 | 1.975028  |
| N  | 1.340022  | -1.460467 | 0.147724  |
| C  | 2.693066  | -1.381422 | -0.118577 |
| C  | 1.123216  | -2.609963 | 0.870237  |
| C  | 3.327474  | -2.485749 | 0.433807  |
| H  | 4.383062  | -2.718770 | 0.380339  |
| C  | 2.334580  | -3.260757 | 1.070036  |
| H  | 2.491037  | -4.187172 | 1.607862  |
| C  | 3.324188  | -0.307658 | -0.978812 |
| C  | 4.852112  | -0.265212 | -0.695427 |
| H  | 5.306572  | 0.417633  | -1.426503 |
| H  | 5.275254  | -1.254954 | -0.904128 |
| C  | 3.122571  | -0.633891 | -2.496039 |
| H  | 3.606847  | 0.171554  | -3.067909 |
| H  | 2.050199  | -0.567591 | -2.700344 |
| C  | 1.405645  | 2.653457  | 0.069598  |
| C  | 2.755211  | 1.071240  | -0.705971 |
| C  | 2.509588  | 3.298903  | -0.463892 |
| H  | 2.693864  | 4.365546  | -0.482963 |
| C  | 3.367492  | 2.287985  | -0.965963 |
| H  | 4.342331  | 2.436717  | -1.414885 |
| Ga | 0.011237  | -0.030501 | -0.386397 |
| C  | -5.243533 | 0.709150  | 0.611952  |
| H  | -4.793251 | 1.668414  | 0.884110  |
| H  | -6.336057 | 0.798293  | 0.688750  |
| H  | -4.903969 | -0.038746 | 1.334672  |
| C  | -3.686604 | -1.467463 | -3.084698 |
| H  | -3.330740 | -2.319485 | -2.495506 |
| H  | -4.783602 | -1.469500 | -3.048251 |
| H  | -3.389812 | -1.624653 | -4.129446 |
| C  | -0.122176 | -1.149865 | 3.229713  |
| H  | -0.965350 | -0.628119 | 2.762669  |
| H  | -0.133884 | -0.923894 | 4.303471  |
| H  | 0.804877  | -0.746793 | 2.806516  |
| C  | -0.281558 | -5.159499 | -0.009629 |
| H  | -0.327419 | -6.256593 | 0.007158  |
| H  | -1.141648 | -4.780910 | -0.571135 |
| H  | 0.628911  | -4.854521 | -0.535782 |
| C  | 5.244026  | 0.168931  | 0.716919  |
| H  | 4.875754  | 1.180039  | 0.916456  |
| H  | 4.805720  | -0.502815 | 1.461138  |
| H  | 6.336081  | 0.160752  | 0.838191  |
| C  | 3.643601  | -1.995508 | -2.955782 |
| H  | 4.736333  | -2.074371 | -2.890885 |
| H  | 3.212680  | -2.794778 | -2.342752 |
| H  | 3.360688  | -2.174274 | -4.000967 |
| C  | -1.066714 | 2.998616  | 3.046439  |
| H  | -1.983279 | 2.740557  | 2.504483  |
| H  | -1.074252 | 2.473656  | 4.009805  |
| H  | -1.092666 | 4.076790  | 3.250709  |
| C  | 1.340987  | 5.302535  | 1.848909  |
| H  | 2.309031  | 4.812143  | 1.711049  |
| H  | 1.476366  | 6.381132  | 1.694782  |
| H  | 1.038659  | 5.155973  | 2.892301  |
| F  | 0.032986  | -0.177657 | -2.210290 |



### Ph<sub>3</sub>SiF

It was not possible to remove a slight imaginary mode (7 i\*cm<sup>-1</sup>) from the structure with the applied computational method (r<sup>2</sup>SCAN-3c, see Chapter S8 for details). Therefore, for the calculation of the reaction Gibbs free energy of the fluoride exchange reaction between [Ph<sub>3</sub>SiF<sub>2</sub>]<sup>-</sup> and [Me<sup>e</sup>1]<sup>-</sup> a value of 11.21 kJ mol<sup>-1</sup> was subtracted from the Gibbs free energy obtained from Orca, to approximately account for the missing low real mode during the calculation of the entropy term. Below, the uncorrected value is given.

|                                                                            |                      |
|----------------------------------------------------------------------------|----------------------|
| Total correction:                                                          | 765.3287 kJ/mol      |
| Final entropy term:                                                        | 162.0527 kJ/mol      |
| Final single point energy:                                                 | -2843686.9781 kJ/mol |
| Final enthalpy:                                                            | -2842919.1704 kJ/mol |
| Final Gibbs free enthalpy:                                                 | -2843081.2231 kJ/mol |
| COSMO-RS correction (CH <sub>2</sub> Cl <sub>2</sub> , enthalpy):          | -54.65 kJ/mol        |
| COSMO-RS correction (CH <sub>2</sub> Cl <sub>2</sub> , Gibbs free energy): | -46.92 kJ/mol        |
| COSMO-RS correction (MeCN, Gibbs free energy):                             | -41.12 kJ/mol        |

xyz, charge: 0, multiplicity: 1

|    |           |           |           |
|----|-----------|-----------|-----------|
| C  | -2.789124 | 0.252226  | -0.813474 |
| C  | -2.823907 | -0.719677 | 0.184293  |
| C  | -1.593105 | 0.892385  | -1.117279 |
| C  | -0.410244 | 0.570993  | -0.433864 |
| C  | -0.463990 | -0.409720 | 0.564726  |
| C  | -1.661443 | -1.049753 | 0.873716  |
| H  | -3.695691 | 0.509329  | -1.354224 |
| H  | -3.758515 | -1.219994 | 0.422767  |
| H  | -1.577781 | 1.651183  | -1.897422 |
| H  | 0.442378  | -0.678301 | 1.103231  |
| H  | -1.686300 | -1.808993 | 1.650426  |
| Si | 1.173305  | 1.470702  | -0.837792 |
| C  | 1.068319  | 3.271083  | -0.361423 |
| C  | 1.993500  | 4.190049  | -0.879257 |
| C  | 0.108826  | 3.733222  | 0.548526  |
| C  | 0.074850  | 5.071041  | 0.932845  |
| C  | 1.958469  | 5.527436  | -0.501146 |
| C  | 0.999102  | 5.968622  | 0.407659  |
| H  | -0.623022 | 3.039452  | 0.957153  |
| H  | -0.676024 | 5.413804  | 1.639292  |
| H  | 2.747684  | 3.855998  | -1.589137 |
| H  | 2.678843  | 6.227922  | -0.914336 |
| H  | 0.972014  | 7.013471  | 0.704665  |
| C  | 2.646402  | 0.646882  | -0.043486 |
| F  | 1.383118  | 1.398602  | -2.441465 |
| C  | 3.134853  | -0.568100 | -0.546819 |
| C  | 3.265556  | 1.197219  | 1.086146  |
| C  | 4.337332  | 0.553044  | 1.698130  |
| C  | 4.208343  | -1.211022 | 0.059603  |
| C  | 4.809490  | -0.650861 | 1.184654  |
| H  | 2.909434  | 2.143984  | 1.487189  |
| H  | 4.807931  | 0.993385  | 2.572762  |
| H  | 2.673115  | -1.013561 | -1.425832 |
| H  | 4.578416  | -2.149052 | -0.344775 |
| H  | 5.648167  | -1.153098 | 1.658997  |

### [Ph<sub>3</sub>SiF<sub>2</sub>]<sup>-</sup>

|                                                                            |                      |
|----------------------------------------------------------------------------|----------------------|
| Total correction:                                                          | 772.8796 kJ/mol      |
| Final entropy term:                                                        | 169.9684 kJ/mol      |
| Final single point energy:                                                 | -3105912.9102 kJ/mol |
| Final enthalpy:                                                            | -3105137.5516 kJ/mol |
| Final Gibbs free enthalpy:                                                 | -3105307.52 kJ/mol   |
| COSMO-RS correction (CH <sub>2</sub> Cl <sub>2</sub> , enthalpy):          | -218.25 kJ/mol       |
| COSMO-RS correction (CH <sub>2</sub> Cl <sub>2</sub> , Gibbs free energy): | -202.65 kJ/mol       |
| COSMO-RS correction (MeCN, Gibbs free energy):                             | -213.19 kJ/mol       |

xyz, charge: -1, multiplicity: 1

|   |           |           |           |
|---|-----------|-----------|-----------|
| C | -2.581602 | -0.992168 | -0.123090 |
| C | -2.257529 | -1.499285 | 1.132524  |
| C | -1.686216 | -0.164161 | -0.797495 |
| C | -0.432271 | 0.165365  | -0.259600 |
| C | -0.126567 | -0.369543 | 1.001529  |
| C | -1.025271 | -1.177685 | 1.695525  |
| H | -3.539970 | -1.237831 | -0.577069 |

|    |           |           |           |
|----|-----------|-----------|-----------|
| H  | -2.957870 | -2.138282 | 1.666745  |
| H  | -1.958797 | 0.243077  | -1.766427 |
| H  | 0.840015  | -0.142923 | 1.441228  |
| H  | -0.759775 | -1.563851 | 2.677955  |
| Si | 0.810795  | 1.298288  | -1.206155 |
| C  | 1.194431  | 3.070215  | -0.546238 |
| C  | 2.451912  | 3.404110  | -0.019857 |
| C  | 0.229415  | 4.089208  | -0.568937 |
| C  | 0.497023  | 5.367272  | -0.082037 |
| C  | 2.737957  | 4.686263  | 0.445518  |
| C  | 1.757682  | 5.674838  | 0.422812  |
| H  | -0.750595 | 3.867361  | -0.980536 |
| H  | -0.280105 | 6.129086  | -0.102813 |
| H  | 3.217744  | 2.635495  | 0.023213  |
| H  | 3.729025  | 4.913215  | 0.834226  |
| H  | 1.973855  | 6.674446  | 0.794625  |
| C  | 1.673307  | 0.666490  | -2.812951 |
| F  | -0.496004 | 1.935898  | -2.157003 |
| C  | 2.637738  | -0.352496 | -2.780998 |
| C  | 1.370194  | 1.208413  | -4.071745 |
| C  | 2.002849  | 0.769707  | -5.233415 |
| C  | 3.258196  | -0.815625 | -3.939787 |
| C  | 2.947757  | -0.251093 | -5.174096 |
| H  | 0.619763  | 1.990686  | -4.133320 |
| H  | 1.751889  | 1.222465  | -6.191047 |
| H  | 2.903158  | -0.786268 | -1.821637 |
| H  | 3.991556  | -1.617680 | -3.879090 |
| H  | 3.437129  | -0.603235 | -6.079996 |
| F  | 2.116667  | 0.660462  | -0.255097 |

#### [Ga(pyrrolato)<sub>4</sub>-F]<sup>2-</sup>

It was not possible to remove a slight imaginary mode (18 i\*cm<sup>-1</sup>) from the structure with the applied computational method (r<sup>2</sup>SCAN-3c, see Chapter S8 for details). This was not a problem, as this structure was only used for the calculation of the FIA (enthalpy scale) of [Ga(pyrrolato)<sub>4</sub>]<sup>-</sup>.

|                                                                            |                      |
|----------------------------------------------------------------------------|----------------------|
| Total correction:                                                          | 803.5672 kJ/mol      |
| Final entropy term:                                                        | 181.7155 kJ/mol      |
| Final single point energy:                                                 | -7512513.7257 kJ/mol |
| Final enthalpy:                                                            | -7511707.6796 kJ/mol |
| Final Gibbs free enthalpy:                                                 | -7511889.3951 kJ/mol |
| COSMO-RS correction (CH <sub>2</sub> Cl <sub>2</sub> , enthalpy):          | -644.61 kJ/mol       |
| COSMO-RS correction (CH <sub>2</sub> Cl <sub>2</sub> , Gibbs free energy): | -611.61 kJ/mol       |

xyz, charge: -2, multiplicity: 1

|    |           |           |           |
|----|-----------|-----------|-----------|
| Ga | 0.106452  | -0.168528 | 0.483900  |
| N  | 0.076610  | -0.012802 | -1.597809 |
| N  | -1.366249 | -1.522884 | 0.387897  |
| N  | -0.525341 | 1.698159  | 0.684385  |
| N  | 2.100510  | -0.373030 | 0.420541  |
| C  | -1.817678 | -2.260655 | 1.455716  |
| C  | -2.159895 | -1.839882 | -0.687592 |
| C  | -3.110345 | -2.774987 | -0.312116 |
| C  | -2.889205 | -3.047301 | 1.066884  |
| H  | -3.442904 | -3.731993 | 1.699920  |
| H  | -1.337361 | -2.147911 | 2.416904  |
| H  | -1.992020 | -1.380407 | -1.652716 |
| H  | -3.869163 | -3.205122 | -0.955924 |
| C  | -0.605649 | 0.910418  | -2.342054 |
| C  | 0.522423  | -0.972614 | -2.463853 |
| C  | -0.590984 | 0.549155  | -3.683836 |
| C  | 0.138851  | -0.667891 | -3.762606 |
| H  | -1.059879 | 1.770661  | -1.865076 |
| H  | -1.044156 | 1.098545  | -4.501203 |
| H  | 0.357796  | -1.248757 | -4.651505 |
| H  | 1.090950  | -1.819154 | -2.097019 |
| C  | -1.795402 | 2.076351  | 1.015213  |
| C  | 0.190308  | 2.833713  | 0.431349  |
| C  | -0.619019 | 3.948630  | 0.602228  |
| C  | -1.899775 | 3.460259  | 0.977135  |
| C  | 2.964820  | 0.043605  | -0.561484 |
| C  | 2.863540  | -0.888286 | 1.437965  |

|   |           |           |           |
|---|-----------|-----------|-----------|
| C | 4.272526  | -0.207240 | -0.178106 |
| C | 4.206864  | -0.811832 | 1.107769  |
| H | 2.584484  | 0.477590  | -1.476248 |
| H | 5.161580  | 0.019009  | -0.755714 |
| H | 2.378060  | -1.246518 | 2.334557  |
| H | 5.036788  | -1.145169 | 1.720830  |
| H | 1.230632  | 2.769286  | 0.134895  |
| H | -0.322225 | 4.982753  | 0.472490  |
| H | -2.541930 | 1.328266  | 1.254024  |
| H | -2.787785 | 4.042913  | 1.192263  |
| F | 0.188320  | -0.467323 | 2.345442  |

### THF

|                                                                            |                     |
|----------------------------------------------------------------------------|---------------------|
| Total correction:                                                          | 317.5197 kJ/mol     |
| Final entropy term:                                                        | 88.5177 kJ/mol      |
| Final single point energy:                                                 | -609538.3066 kJ/mol |
| Final enthalpy:                                                            | -609218.3079 kJ/mol |
| Final Gibbs free enthalpy:                                                 | -609306.8256 kJ/mol |
| COSMO-RS correction (CH <sub>2</sub> Cl <sub>2</sub> , enthalpy):          | -24.62 kJ/mol       |
| COSMO-RS correction (CH <sub>2</sub> Cl <sub>2</sub> , Gibbs free energy): | -16.44 kJ/mol       |

xyz, charge: 0, multiplicity: 1

|   |           |           |           |
|---|-----------|-----------|-----------|
| C | -5.717755 | 1.102332  | -0.233116 |
| C | -5.575460 | -0.367071 | 0.156899  |
| C | -4.369997 | 1.667028  | 0.225294  |
| C | -3.423676 | 0.525371  | -0.141115 |
| O | -4.182452 | -0.687411 | 0.004586  |
| H | -4.375276 | 1.827697  | 1.309935  |
| H | -4.104089 | 2.609538  | -0.262381 |
| H | -2.542436 | 0.467310  | 0.508762  |
| H | -3.081794 | 0.615207  | -1.184523 |
| H | -6.576495 | 1.585382  | 0.242318  |
| H | -5.821594 | 1.201851  | -1.320155 |
| H | -6.160172 | -1.043943 | -0.477016 |
| H | -5.873495 | -0.526931 | 1.205652  |

### [Me<sub>4</sub>-thf]<sup>-</sup>

|                                                                            |                      |
|----------------------------------------------------------------------------|----------------------|
| Total correction:                                                          | 1818.2677 kJ/mol     |
| Final entropy term:                                                        | 252.391 kJ/mol       |
| Final single point energy:                                                 | -9084508.268 kJ/mol  |
| Final enthalpy:                                                            | -9082687.5214 kJ/mol |
| Final Gibbs free enthalpy:                                                 | -9082939.9124 kJ/mol |
| COSMO-RS correction (CH <sub>2</sub> Cl <sub>2</sub> , enthalpy):          | -219.28 kJ/mol       |
| COSMO-RS correction (CH <sub>2</sub> Cl <sub>2</sub> , Gibbs free energy): | -204.05 kJ/mol       |

xyz, charge: -1, multiplicity: 1

|   |           |           |           |
|---|-----------|-----------|-----------|
| N | -0.414273 | -2.170128 | 0.382199  |
| C | -1.259318 | -3.032702 | 1.064112  |
| C | -0.335515 | -2.620210 | -0.918036 |
| C | -1.718826 | -4.001795 | 0.186450  |
| H | -2.354916 | -4.842468 | 0.431669  |
| C | -1.125814 | -3.742590 | -1.075685 |
| H | -1.253937 | -4.320816 | -1.980640 |
| N | -0.216189 | -0.816384 | 2.790889  |
| C | 0.105927  | 0.024682  | 3.834753  |
| C | -1.036979 | -1.808382 | 3.300427  |
| C | -0.515948 | -0.405539 | 4.990645  |
| C | -1.248339 | -1.570799 | 4.649211  |
| H | -1.813504 | -2.193431 | 5.330737  |
| N | 0.084500  | 1.670634  | 1.395266  |
| C | -0.121058 | 2.801285  | 0.617223  |
| C | 0.645669  | 2.094031  | 2.584989  |
| C | 0.293471  | 3.916587  | 1.322338  |
| H | 0.253001  | 4.943152  | 0.986005  |
| C | 0.784282  | 3.466771  | 2.571363  |
| H | 1.199680  | 4.079304  | 3.359695  |
| N | -0.153702 | 0.324310  | -1.039861 |
| C | 0.117257  | -0.508450 | -2.107473 |
| C | -0.431325 | 1.579465  | -1.561023 |

|    |           |           |           |
|----|-----------|-----------|-----------|
| C  | -0.001110 | 0.194757  | -3.288749 |
| H  | 0.162926  | -0.189571 | -4.286073 |
| C  | -0.354087 | 1.520947  | -2.941522 |
| H  | -0.514658 | 2.338600  | -3.630355 |
| H  | -0.435254 | -2.682008 | -3.683880 |
| C  | 0.563255  | -2.683443 | -3.235127 |
| C  | 2.019348  | -1.936096 | -1.355176 |
| C  | 0.568960  | -1.930438 | -1.901454 |
| H  | 2.358695  | -2.964520 | -1.181228 |
| H  | 0.879185  | -3.720846 | -3.081339 |
| H  | 2.083739  | -1.395501 | -0.406171 |
| H  | -3.531240 | -2.856761 | 2.697778  |
| C  | -2.763373 | -3.581534 | 2.985572  |
| C  | -0.325105 | -4.149051 | 3.043452  |
| C  | -1.365699 | -3.089203 | 2.570227  |
| H  | 0.680503  | -3.827018 | 2.755805  |
| H  | -2.997248 | -4.539699 | 2.511543  |
| H  | -0.527885 | -5.117595 | 2.571351  |
| H  | 2.337780  | -0.049054 | 2.232542  |
| C  | 2.457658  | 0.487239  | 3.178970  |
| C  | 1.365455  | 1.851389  | 4.956014  |
| C  | 1.115847  | 1.120286  | 3.632986  |
| H  | 1.701816  | 1.140920  | 5.718544  |
| H  | 2.813694  | -0.230692 | 3.928012  |
| H  | 0.454646  | 2.344819  | 5.310029  |
| C  | -0.799340 | 2.790492  | -0.732280 |
| C  | -2.338536 | 2.877734  | -0.547770 |
| C  | -0.386930 | 4.058120  | -1.505837 |
| H  | -2.834593 | 2.883879  | -1.526427 |
| H  | -0.899288 | 4.096412  | -2.471506 |
| H  | -2.705157 | 2.024919  | 0.021240  |
| H  | 0.692970  | 4.076787  | -1.677389 |
| H  | -2.599118 | 3.793496  | -0.003022 |
| H  | -0.674218 | 4.954576  | -0.948266 |
| H  | 2.689196  | -1.445372 | -2.070835 |
| H  | 1.258488  | -2.213343 | -3.937960 |
| H  | -0.357750 | -4.254064 | 4.134113  |
| H  | -2.816547 | -3.724243 | 4.069274  |
| H  | 2.144085  | 2.610425  | 4.830409  |
| H  | 3.210942  | 1.270308  | 3.033647  |
| H  | -0.438180 | 0.044047  | 5.971186  |
| Ga | -0.349198 | -0.215034 | 0.880314  |
| O  | -2.397099 | -0.058043 | 0.900103  |
| C  | -3.177493 | 0.405131  | 2.040739  |
| C  | -3.241587 | -0.650900 | -0.133362 |
| C  | -4.601559 | -0.788015 | 0.536304  |
| C  | -4.615448 | 0.373393  | 1.539995  |
| H  | -2.810072 | 1.402139  | 2.303901  |
| H  | -2.995820 | -0.282505 | 2.877019  |
| H  | -4.866226 | 1.312489  | 1.032140  |
| H  | -5.324692 | 0.221206  | 2.359125  |
| H  | -2.794692 | -1.604496 | -0.427494 |
| H  | -3.252588 | 0.038700  | -0.986664 |
| H  | -5.419519 | -0.735771 | -0.188346 |
| H  | -4.661321 | -1.749165 | 1.058639  |

### TS-1

|                                                                            |                      |
|----------------------------------------------------------------------------|----------------------|
| Total correction:                                                          | 1520.3926 kJ/mol     |
| Final entropy term:                                                        | 220.7647 kJ/mol      |
| Final single point energy:                                                 | -8476125.7934 kJ/mol |
| Final enthalpy:                                                            | -8474602.9218 kJ/mol |
| Final Gibbs free enthalpy:                                                 | -8474823.6865 kJ/mol |
| COSMO-RS correction (CH <sub>2</sub> Cl <sub>2</sub> , enthalpy):          | -86.90 kJ/mol        |
| COSMO-RS correction (CH <sub>2</sub> Cl <sub>2</sub> , Gibbs free energy): | -75.95 kJ/mol        |

xyz, charge: 0, multiplicity: 1

|   |          |           |          |
|---|----------|-----------|----------|
| N | 1.100760 | -2.108044 | 2.215271 |
| C | 2.646588 | -1.392188 | 4.085628 |
| C | 2.953446 | -1.848767 | 5.516975 |
| H | 3.410640 | -2.841743 | 5.505682 |
| H | 2.042089 | -1.889309 | 6.120578 |

|    |           |           |           |
|----|-----------|-----------|-----------|
| H  | 3.663803  | -1.166132 | 5.992622  |
| C  | 3.986714  | -1.357907 | 3.296254  |
| H  | 4.453938  | -2.348303 | 3.302004  |
| H  | 4.669847  | -0.627153 | 3.743630  |
| H  | 3.821317  | -1.077012 | 2.249150  |
| N  | 1.452995  | 0.573466  | 3.008861  |
| C  | 1.075467  | 1.864737  | 3.345462  |
| C  | 2.073043  | 0.003268  | 4.112388  |
| C  | 1.491313  | 2.118414  | 4.635287  |
| H  | 1.322742  | 3.023946  | 5.200801  |
| C  | 2.125041  | 0.944685  | 5.116820  |
| H  | 2.556441  | 0.812201  | 6.098328  |
| C  | 0.037887  | 2.636922  | 2.559987  |
| C  | -1.371757 | 2.151767  | 3.010343  |
| H  | -1.495854 | 2.359569  | 4.077130  |
| H  | -1.477149 | 1.073329  | 2.858297  |
| H  | -2.160367 | 2.663167  | 2.445936  |
| C  | 0.152159  | 4.135374  | 2.868720  |
| H  | -0.650585 | 4.695475  | 2.379159  |
| H  | 1.119082  | 4.535065  | 2.548079  |
| H  | 0.054359  | 4.300138  | 3.943623  |
| N  | 0.160755  | 1.171782  | 0.523760  |
| C  | 0.192094  | 1.337815  | -0.877579 |
| C  | 0.109723  | 2.406795  | 1.074412  |
| C  | 0.023562  | 2.714013  | -1.154133 |
| H  | -0.054345 | 3.146168  | -2.142772 |
| C  | 0.024773  | 3.384319  | 0.053811  |
| H  | -0.017048 | 4.452948  | 0.204539  |
| C  | 2.231608  | 0.916397  | -1.390174 |
| C  | 2.446614  | 1.600712  | -2.716939 |
| H  | 2.492581  | 2.684853  | -2.592133 |
| H  | 1.662521  | 1.355554  | -3.437349 |
| H  | 3.405556  | 1.267529  | -3.135913 |
| C  | 2.968306  | 1.558840  | -0.251885 |
| H  | 3.992914  | 1.759084  | -0.592345 |
| H  | 3.054929  | 0.932566  | 0.640258  |
| H  | 2.528594  | 2.521816  | 0.034753  |
| N  | 1.550001  | -1.155571 | -0.313094 |
| C  | 1.092739  | -2.377584 | -0.708729 |
| C  | 2.040309  | -0.495084 | -1.427948 |
| C  | 1.362571  | -2.540792 | -2.077291 |
| H  | 1.157310  | -3.424047 | -2.664598 |
| C  | 1.928263  | -1.348749 | -2.534785 |
| H  | 2.250283  | -1.129923 | -3.543954 |
| C  | 0.216479  | -3.246008 | 0.183806  |
| C  | -1.206911 | -2.627632 | 0.181125  |
| H  | -1.604682 | -2.572083 | -0.838404 |
| H  | -1.215638 | -1.611702 | 0.596905  |
| H  | -1.872871 | -3.239064 | 0.798439  |
| C  | 0.122137  | -4.664084 | -0.386998 |
| H  | -0.336602 | -4.653193 | -1.380210 |
| H  | -0.503261 | -5.281895 | 0.263821  |
| H  | 1.111330  | -5.125722 | -0.458143 |
| C  | 1.750963  | -2.409176 | 3.400747  |
| C  | 0.771594  | -3.286315 | 1.582624  |
| C  | 1.761261  | -3.783712 | 3.540851  |
| H  | 2.208395  | -4.342029 | 4.351093  |
| C  | 1.139866  | -4.340787 | 2.390011  |
| H  | 1.006206  | -5.392784 | 2.180214  |
| Ga | 1.034062  | -0.382513 | 1.419732  |
| H  | -0.168693 | 0.532226  | -1.504079 |

### Int-1

|                                                                            |                      |
|----------------------------------------------------------------------------|----------------------|
| Total correction:                                                          | 1523.3881 kJ/mol     |
| Final entropy term:                                                        | 228.1835 kJ/mol      |
| Final single point energy:                                                 | -8476179.1563 kJ/mol |
| Final enthalpy:                                                            | -8474653.2892 kJ/mol |
| Final Gibbs free enthalpy:                                                 | -8474881.4727 kJ/mol |
| COSMO-RS correction (CH <sub>2</sub> Cl <sub>2</sub> , enthalpy):          | -94.70 kJ/mol        |
| COSMO-RS correction (CH <sub>2</sub> Cl <sub>2</sub> , Gibbs free energy): | -82.58 kJ/mol        |

xyz, charge: 0, multiplicity: 1

|    |           |           |           |
|----|-----------|-----------|-----------|
| N  | -0.861215 | -1.731906 | -0.498853 |
| C  | -2.817616 | -0.567826 | -1.490834 |
| C  | -2.105986 | -0.005513 | -2.745696 |
| H  | -2.565308 | 0.935327  | -3.070579 |
| H  | -2.193941 | -0.740122 | -3.551922 |
| H  | -1.039104 | 0.178026  | -2.586136 |
| C  | -4.270637 | -0.875229 | -1.873906 |
| H  | -4.278587 | -1.671415 | -2.622863 |
| H  | -4.756331 | 0.001067  | -2.313747 |
| H  | -4.851913 | -1.211475 | -1.010007 |
| N  | -1.698856 | 0.752416  | 0.360464  |
| C  | -2.021658 | 1.848832  | 1.185066  |
| C  | -2.778571 | 0.473999  | -0.379286 |
| C  | -3.394706 | 2.196218  | 0.935667  |
| C  | -3.862050 | 1.346145  | -0.018625 |
| C  | -1.143231 | 2.487877  | 2.013209  |
| C  | 0.264924  | 2.058503  | 2.199942  |
| H  | 0.889092  | 2.528489  | 1.419935  |
| H  | 0.412633  | 0.976348  | 2.139385  |
| H  | 0.650324  | 2.398244  | 3.166057  |
| C  | -1.526088 | 3.723042  | 2.755762  |
| H  | -0.796418 | 4.510865  | 2.527542  |
| H  | -1.454133 | 3.541875  | 3.835922  |
| H  | -2.522497 | 4.095310  | 2.523249  |
| N  | 0.794127  | 1.467771  | -1.013008 |
| C  | 2.052175  | 1.948652  | -0.670221 |
| C  | 0.031758  | 2.550250  | -1.417406 |
| C  | 2.065652  | 3.317268  | -0.876982 |
| C  | 0.785489  | 3.696700  | -1.353617 |
| C  | 3.220626  | 1.103756  | -0.191084 |
| C  | 4.377132  | 1.288654  | -1.196979 |
| H  | 4.624016  | 2.349605  | -1.291913 |
| H  | 4.093989  | 0.908664  | -2.182697 |
| H  | 5.275542  | 0.762496  | -0.859960 |
| C  | 3.705589  | 1.621808  | 1.188676  |
| H  | 4.616340  | 1.087079  | 1.476830  |
| H  | 2.953257  | 1.438846  | 1.961019  |
| H  | 3.919330  | 2.695732  | 1.154289  |
| N  | 1.709532  | -0.847882 | 0.469933  |
| C  | 1.816092  | -2.237141 | 0.541602  |
| C  | 2.909780  | -0.365694 | -0.058143 |
| C  | 3.070260  | -2.609941 | 0.123127  |
| H  | 3.457494  | -3.617866 | 0.080737  |
| C  | 3.759730  | -1.429719 | -0.257280 |
| H  | 4.775139  | -1.379575 | -0.623267 |
| C  | 0.661265  | -3.091700 | 0.994304  |
| C  | 1.090321  | -4.561712 | 1.056259  |
| H  | 1.949941  | -4.676067 | 1.724060  |
| H  | 1.359250  | -4.935145 | 0.063993  |
| H  | 0.275786  | -5.178237 | 1.447101  |
| C  | 0.229121  | -2.650817 | 2.418519  |
| H  | 1.076056  | -2.726013 | 3.109815  |
| H  | -0.592581 | -3.279671 | 2.776755  |
| H  | -0.119665 | -1.611884 | 2.420790  |
| C  | -2.145910 | -1.812753 | -0.984571 |
| C  | -0.540352 | -2.944721 | 0.081177  |
| C  | -2.629956 | -3.087335 | -0.768805 |
| H  | -3.602447 | -3.466865 | -1.049954 |
| C  | -1.605577 | -3.806632 | -0.100434 |
| H  | -1.659588 | -4.834254 | 0.229975  |
| Ga | 0.085184  | -0.108312 | -0.189955 |
| H  | 0.463459  | 4.689222  | -1.638444 |
| H  | 2.913597  | 3.972120  | -0.727272 |
| H  | -1.001166 | 2.427762  | -1.711142 |
| H  | -4.857441 | 1.317221  | -0.435955 |
| H  | -3.952658 | 2.977008  | 1.431573  |

[H-Me1\*-(thf)<sub>2</sub>]

|                                                                            |                      |
|----------------------------------------------------------------------------|----------------------|
| Total correction:                                                          | 2180.5152 kJ/mol     |
| Final entropy term:                                                        | 286.2873 kJ/mol      |
| Final single point energy:                                                 | -9695439.8223 kJ/mol |
| Final enthalpy:                                                            | -9693256.8282 kJ/mol |
| Final Gibbs free enthalpy:                                                 | -9693543.1155 kJ/mol |
| COSMO-RS correction (CH <sub>2</sub> Cl <sub>2</sub> , enthalpy):          | -96.37 kJ/mol        |
| COSMO-RS correction (CH <sub>2</sub> Cl <sub>2</sub> , Gibbs free energy): | -86.17 kJ/mol        |

xyz, charge: 0, multiplicity: 1

|   |           |           |           |
|---|-----------|-----------|-----------|
| N | 1.962521  | -0.533119 | 0.141265  |
| C | 1.692636  | -3.050747 | 0.163861  |
| C | 2.268501  | -4.236447 | -0.635265 |
| H | 2.102311  | -4.100700 | -1.708404 |
| H | 1.793275  | -5.171585 | -0.329705 |
| H | 3.343200  | -4.335572 | -0.453052 |
| C | 1.993573  | -3.305207 | 1.664640  |
| H | 3.074922  | -3.376495 | 1.826164  |
| H | 1.514866  | -4.230931 | 2.003751  |
| H | 1.611544  | -2.476628 | 2.264127  |
| N | -0.568691 | -1.907289 | -0.372756 |
| C | -1.888466 | -2.341510 | -0.477472 |
| C | 0.189363  | -3.019582 | -0.037425 |
| C | -1.951122 | -3.691963 | -0.192356 |
| H | -2.835631 | -4.314666 | -0.221920 |
| C | -0.640011 | -4.119588 | 0.090779  |
| H | -0.334908 | -5.128388 | 0.332735  |
| C | -3.077843 | -1.522344 | -0.934574 |
| C | -3.801084 | -2.268736 | -2.072929 |
| H | -4.137622 | -3.247355 | -1.724287 |
| H | -3.128961 | -2.432773 | -2.921605 |
| H | -4.686242 | -1.720158 | -2.414119 |
| C | -4.069353 | -1.299431 | 0.221308  |
| H | -3.620988 | -0.700914 | 1.019538  |
| H | -4.345232 | -2.268130 | 0.647019  |
| H | -4.982312 | -0.797117 | -0.119658 |
| N | -1.857091 | 0.578829  | -0.493267 |
| C | -2.445510 | 1.717376  | -0.282411 |
| C | -2.595104 | -0.160224 | -1.507432 |
| C | -3.600017 | 1.880216  | -1.167035 |
| H | -4.245889 | 2.746034  | -1.208048 |
| C | -3.683532 | 0.769179  | -1.916267 |
| H | -4.419546 | 0.554650  | -2.680458 |
| C | -2.032667 | 2.668439  | 0.800515  |
| C | -2.579890 | 4.077305  | 0.492896  |
| H | -3.674409 | 4.078754  | 0.453860  |
| H | -2.182647 | 4.458258  | -0.453172 |
| H | -2.283255 | 4.768680  | 1.282941  |
| C | -2.731866 | 2.156470  | 2.091417  |
| H | -2.488906 | 2.833763  | 2.915823  |
| H | -2.380233 | 1.152800  | 2.338613  |
| H | -3.821554 | 2.130938  | 1.967354  |
| N | 0.400372  | 1.879309  | 0.413863  |
| C | 1.655635  | 2.349324  | 0.763091  |
| C | -0.527633 | 2.744197  | 0.973973  |
| C | 1.515645  | 3.483222  | 1.545028  |
| H | 2.312408  | 4.096336  | 1.941799  |
| C | 0.134376  | 3.734081  | 1.676395  |
| H | -0.313145 | 4.564382  | 2.205971  |
| C | 2.955817  | 1.829184  | 0.195035  |
| C | 3.338660  | 2.712282  | -1.018858 |
| H | 4.293817  | 2.392120  | -1.448640 |
| H | 3.424214  | 3.759565  | -0.710796 |
| H | 2.574399  | 2.644678  | -1.798377 |
| C | 4.065265  | 1.989221  | 1.263638  |
| H | 4.172502  | 3.032366  | 1.577898  |
| H | 5.023425  | 1.654666  | 0.856302  |
| H | 3.836535  | 1.379886  | 2.143681  |
| C | 2.404236  | -1.790615 | -0.245265 |
| C | 2.942002  | 0.375868  | -0.219973 |
| C | 3.646058  | -1.672491 | -0.839409 |
| H | 4.261258  | -2.476469 | -1.217817 |

|    |           |           |           |
|----|-----------|-----------|-----------|
| C  | 3.983337  | -0.297880 | -0.828284 |
| H  | 4.913167  | 0.134364  | -1.175004 |
| Ga | 0.072857  | -0.046197 | 0.002387  |
| H  | -1.918033 | -0.388924 | -2.344591 |
| O  | -0.401218 | -0.329284 | 2.137364  |
| C  | -0.416869 | -1.644143 | 4.141783  |
| C  | 0.725942  | -0.614291 | 4.168543  |
| C  | 0.255626  | 0.437372  | 3.182389  |
| H  | 0.890710  | -0.196279 | 5.165814  |
| H  | -0.475412 | 1.121961  | 3.634826  |
| C  | -1.055175 | -1.480912 | 2.749920  |
| H  | -1.148790 | -1.420789 | 4.924483  |
| H  | -2.130493 | -1.273555 | 2.816651  |
| H  | 1.665833  | -1.053865 | 3.821551  |
| H  | -0.897787 | -2.337640 | 2.090260  |
| H  | 1.051379  | 1.022549  | 2.716638  |
| H  | -0.056888 | -2.664651 | 4.298465  |
| H  | 0.370705  | 2.434503  | -2.112615 |
| O  | 0.350328  | 0.379403  | -2.193913 |
| C  | 1.084289  | -0.483257 | -3.098291 |
| C  | 1.921555  | 0.480137  | -3.918773 |
| C  | 0.968216  | 1.669974  | -4.106777 |
| C  | 0.104091  | 1.657317  | -2.835286 |
| H  | 1.666388  | -1.177828 | -2.487676 |
| H  | 0.366127  | -1.040921 | -3.720479 |
| H  | 2.248394  | 0.046964  | -4.868387 |
| H  | 2.804001  | 0.764683  | -3.338058 |
| H  | 0.343388  | 1.522151  | -4.994205 |
| H  | 1.499585  | 2.618717  | -4.223747 |
| H  | -0.967669 | 1.743451  | -3.063804 |

[H-Me1\*-thf]<sub>anti</sub>

|                                                                            |                      |
|----------------------------------------------------------------------------|----------------------|
| Total correction:                                                          | 1855.2126 kJ/mol     |
| Final entropy term:                                                        | 249.7951 kJ/mol      |
| Final single point energy:                                                 | -9085842.1888 kJ/mol |
| Final enthalpy:                                                            | -9083984.4973 kJ/mol |
| Final Gibbs free enthalpy:                                                 | -9084234.2924 kJ/mol |
| COSMO-RS correction (CH <sub>2</sub> Cl <sub>2</sub> , enthalpy):          | -81.88 kJ/mol        |
| COSMO-RS correction (CH <sub>2</sub> Cl <sub>2</sub> , Gibbs free energy): | -73.67 kJ/mol        |

xyz, charge: 0, multiplicity: 1

|   |           |           |           |
|---|-----------|-----------|-----------|
| N | 1.924156  | -0.203707 | 0.725066  |
| C | 2.523975  | 2.247512  | 0.798392  |
| C | 2.490863  | 2.383058  | 2.347855  |
| H | 1.711359  | 1.742186  | 2.769135  |
| H | 2.282247  | 3.420904  | 2.632144  |
| H | 3.454625  | 2.076510  | 2.768969  |
| C | 3.635198  | 3.163337  | 0.272570  |
| H | 4.597274  | 2.869895  | 0.700668  |
| H | 3.447173  | 4.198795  | 0.569301  |
| H | 3.712296  | 3.120075  | -0.818812 |
| N | 0.018375  | 1.977144  | 0.490817  |
| C | -1.036628 | 2.821124  | 0.148984  |
| C | 1.186212  | 2.704898  | 0.278775  |
| C | -0.538999 | 4.027533  | -0.297561 |
| H | -1.116954 | 4.887418  | -0.609262 |
| C | 0.870185  | 3.952702  | -0.218739 |
| H | 1.565337  | 4.743615  | -0.460081 |
| C | -2.496996 | 2.504925  | 0.362682  |
| C | -3.174476 | 3.680133  | 1.090972  |
| H | -2.727185 | 3.844624  | 2.076851  |
| H | -4.250807 | 3.511835  | 1.205796  |
| H | -3.047000 | 4.598510  | 0.514170  |
| C | -3.207995 | 2.273143  | -0.982201 |
| H | -4.272638 | 2.045249  | -0.855362 |
| H | -2.738409 | 1.464539  | -1.547849 |
| H | -3.121366 | 3.184857  | -1.580262 |
| N | -2.013031 | 0.103073  | 0.603228  |
| C | -2.950859 | -0.773039 | 0.374697  |
| C | -2.600769 | 1.248867  | 1.290278  |
| C | -4.209730 | -0.361873 | 0.991556  |



|    |           |           |           |
|----|-----------|-----------|-----------|
| H  | -5.127902 | -0.931737 | 0.982558  |
| C  | -3.998880 | 0.830790  | 1.569271  |
| H  | -4.717053 | 1.423799  | 2.120496  |
| C  | -2.776151 | -1.972427 | -0.506757 |
| C  | -3.852631 | -3.025676 | -0.172922 |
| H  | -3.714725 | -3.903174 | -0.805815 |
| H  | -4.859711 | -2.641478 | -0.366237 |
| H  | -3.779294 | -3.347971 | 0.870188  |
| C  | -3.025842 | -1.477821 | -1.961203 |
| H  | -2.978885 | -2.341514 | -2.631264 |
| H  | -2.256647 | -0.762106 | -2.259206 |
| H  | -4.011975 | -1.007789 | -2.060720 |
| N  | -0.319154 | -1.997076 | 0.262939  |
| C  | 0.695081  | -2.941774 | 0.276912  |
| C  | -1.404585 | -2.591449 | -0.368003 |
| C  | 0.269456  | -4.091872 | -0.354350 |
| H  | 0.834151  | -5.004677 | -0.477203 |
| C  | -1.064550 | -3.868437 | -0.766713 |
| H  | -1.705143 | -4.585096 | -1.262304 |
| C  | 1.974630  | -2.705448 | 1.030709  |
| C  | 1.653262  | -2.655040 | 2.547699  |
| H  | 2.571964  | -2.488238 | 3.120935  |
| H  | 1.193728  | -3.597809 | 2.865564  |
| H  | 0.957824  | -1.841099 | 2.771414  |
| C  | 2.946627  | -3.864666 | 0.790711  |
| H  | 3.207760  | -3.953878 | -0.268694 |
| H  | 2.499939  | -4.806834 | 1.121790  |
| H  | 3.864205  | -3.707823 | 1.364885  |
| C  | 2.841232  | 0.812975  | 0.478032  |
| C  | 2.615618  | -1.405365 | 0.630720  |
| C  | 4.072646  | 0.256894  | 0.208535  |
| H  | 4.988743  | 0.792174  | 0.003152  |
| C  | 3.929642  | -1.151890 | 0.307586  |
| H  | 4.712643  | -1.886154 | 0.182190  |
| Ga | 0.035486  | -0.025078 | 0.257956  |
| H  | -2.034166 | 1.478042  | 2.204961  |
| O  | 0.039452  | 0.034694  | -1.821563 |
| C  | 1.793766  | 1.097377  | -3.027767 |
| C  | 2.084412  | -0.419209 | -2.899626 |
| C  | 0.733883  | -1.031411 | -2.553823 |
| H  | 2.488980  | -0.852356 | -3.818817 |
| H  | 0.128273  | -1.245426 | -3.444930 |
| C  | 0.336123  | 1.249310  | -2.587372 |
| H  | 1.927689  | 1.467750  | -4.048359 |
| H  | -0.353597 | 1.250112  | -3.442298 |
| H  | 2.794139  | -0.601604 | -2.086892 |
| H  | 0.139539  | 2.112183  | -1.951735 |
| H  | 0.776915  | -1.914930 | -1.914946 |
| H  | 2.451158  | 1.665014  | -2.364930 |

[H-Me1\*-thf]<sub>syn</sub>

|                                                                            |                      |
|----------------------------------------------------------------------------|----------------------|
| Total correction:                                                          | 1853.8786 kJ/mol     |
| Final entropy term:                                                        | 251.5532 kJ/mol      |
| Final single point energy:                                                 | -9085844.7664 kJ/mol |
| Final enthalpy:                                                            | -9083988.4089 kJ/mol |
| Final Gibbs free enthalpy:                                                 | -9084239.9621 kJ/mol |
| COSMO-RS correction (CH <sub>2</sub> Cl <sub>2</sub> , enthalpy):          | -94.00 kJ/mol        |
| COSMO-RS correction (CH <sub>2</sub> Cl <sub>2</sub> , Gibbs free energy): | -83.86 kJ/mol        |

xyz, charge: 0, multiplicity: 1

|   |           |           |          |
|---|-----------|-----------|----------|
| N | 1.845960  | -0.733073 | 0.349844 |
| C | 1.212603  | -2.920997 | 1.355390 |
| C | 1.707200  | -4.369806 | 1.360524 |
| H | 2.738433  | -4.406456 | 1.724552 |
| H | 1.679813  | -4.805516 | 0.356844 |
| H | 1.088835  | -4.981859 | 2.024212 |
| C | 1.281696  | -2.380548 | 2.804721 |
| H | 2.314703  | -2.414791 | 3.167509 |
| H | 0.646308  | -2.983913 | 3.462766 |
| H | 0.940437  | -1.342688 | 2.855530 |
| N | -0.912689 | -1.662079 | 0.770235 |

|    |           |           |           |
|----|-----------|-----------|-----------|
| C  | -2.206570 | -1.992931 | 0.345543  |
| C  | -0.214581 | -2.860270 | 0.871268  |
| C  | -2.289603 | -3.359328 | 0.170950  |
| H  | -3.166731 | -3.918309 | -0.121897 |
| C  | -1.030938 | -3.908290 | 0.508298  |
| H  | -0.765097 | -4.955238 | 0.500332  |
| C  | -3.371134 | -1.037965 | 0.351337  |
| C  | -4.598697 | -1.688726 | -0.298733 |
| H  | -4.405365 | -1.963763 | -1.341249 |
| H  | -5.459617 | -1.014904 | -0.262806 |
| H  | -4.875186 | -2.594377 | 0.246452  |
| C  | -3.719824 | -0.656498 | 1.801705  |
| H  | -2.868340 | -0.199419 | 2.311661  |
| H  | -3.978977 | -1.568162 | 2.347894  |
| H  | -4.572604 | 0.031028  | 1.845947  |
| N  | -1.870843 | 0.905430  | 0.129493  |
| C  | -2.225715 | 2.103429  | 0.494894  |
| C  | -3.012323 | 0.242805  | -0.482403 |
| C  | -3.594576 | 2.395538  | 0.088433  |
| H  | -4.110228 | 3.332133  | 0.250568  |
| C  | -4.068663 | 1.291376  | -0.514743 |
| H  | -5.053323 | 1.155778  | -0.943791 |
| C  | -1.285690 | 2.995874  | 1.258819  |
| C  | -1.850556 | 4.414060  | 1.380509  |
| H  | -1.134608 | 5.047599  | 1.910621  |
| H  | -2.784402 | 4.410150  | 1.952316  |
| H  | -2.039870 | 4.859713  | 0.398925  |
| C  | -1.115049 | 2.409207  | 2.681095  |
| H  | -2.076847 | 2.371326  | 3.206106  |
| H  | -0.423906 | 3.041455  | 3.246447  |
| H  | -0.700499 | 1.397091  | 2.652025  |
| N  | 0.757782  | 1.840813  | 0.355213  |
| C  | 1.919800  | 2.189694  | -0.326800 |
| C  | 0.022830  | 3.000339  | 0.515715  |
| C  | 1.887691  | 3.546033  | -0.599015 |
| H  | 2.662802  | 4.119583  | -1.087330 |
| C  | 0.685094  | 4.062065  | -0.063446 |
| H  | 0.363847  | 5.093979  | -0.080752 |
| C  | 3.125086  | 1.289595  | -0.489241 |
| C  | 3.877196  | 1.653472  | -1.779488 |
| H  | 4.775608  | 1.039486  | -1.883055 |
| H  | 4.196801  | 2.698881  | -1.763122 |
| H  | 3.248653  | 1.500141  | -2.662453 |
| C  | 4.063673  | 1.586241  | 0.718699  |
| H  | 4.976458  | 0.985925  | 0.640021  |
| H  | 3.558875  | 1.326934  | 1.654166  |
| H  | 4.325374  | 2.649748  | 0.745916  |
| C  | 2.094368  | -2.083142 | 0.470180  |
| C  | 2.841712  | -0.193276 | -0.454004 |
| C  | 3.223702  | -2.411375 | -0.250888 |
| H  | 3.676480  | -3.389740 | -0.331883 |
| C  | 3.694870  | -1.210699 | -0.844433 |
| H  | 4.599080  | -1.104552 | -1.428340 |
| Ga | 0.033671  | 0.003072  | 0.232063  |
| H  | -2.749087 | -0.105832 | -1.492228 |
| O  | -0.188596 | -0.303071 | -1.790936 |
| C  | 0.160074  | -1.419176 | -3.821073 |
| C  | 0.683314  | 0.014116  | -3.970351 |
| C  | 0.032614  | 0.739870  | -2.799471 |
| H  | 1.773007  | 0.022572  | -3.860624 |
| H  | 0.652638  | 1.527457  | -2.357351 |
| C  | 0.219061  | -1.617234 | -2.319509 |
| H  | 0.774832  | -2.152541 | -4.349582 |
| H  | 1.236701  | -1.826182 | -1.970231 |
| H  | 0.423513  | 0.473176  | -4.928108 |
| H  | -0.482297 | -2.350069 | -1.909360 |
| H  | -0.953133 | 1.148385  | -3.056201 |
| H  | -0.871770 | -1.499634 | -4.183913 |

**TS-2**

|                                                                            |                      |
|----------------------------------------------------------------------------|----------------------|
| Total correction:                                                          | 1848.2505 kJ/mol     |
| Final entropy term:                                                        | 250.1719 kJ/mol      |
| Final single point energy:                                                 | -9085753.3809 kJ/mol |
| Final enthalpy:                                                            | -9083902.6515 kJ/mol |
| Final Gibbs free enthalpy:                                                 | -9084152.8234 kJ/mol |
| COSMO-RS correction (CH <sub>2</sub> Cl <sub>2</sub> , enthalpy):          | -81.88 kJ/mol        |
| COSMO-RS correction (CH <sub>2</sub> Cl <sub>2</sub> , Gibbs free energy): | -73.67 kJ/mol        |

xyz, charge: 0, multiplicity: 1

|   |           |           |           |
|---|-----------|-----------|-----------|
| N | 1.858244  | -0.075700 | 0.863548  |
| C | 2.232627  | 2.320791  | 1.517870  |
| C | 1.686341  | 2.086804  | 2.952310  |
| H | 0.847839  | 1.383509  | 2.946461  |
| H | 1.344601  | 3.031429  | 3.389852  |
| H | 2.476942  | 1.662561  | 3.580236  |
| C | 3.399494  | 3.311736  | 1.606993  |
| H | 4.209037  | 2.874149  | 2.197949  |
| H | 3.086199  | 4.234338  | 2.103284  |
| H | 3.787152  | 3.562889  | 0.614773  |
| N | 0.111645  | 2.151566  | 0.173356  |
| C | -0.879274 | 3.039315  | -0.261928 |
| C | 1.108524  | 2.907290  | 0.699917  |
| C | -0.447698 | 4.355552  | -0.012084 |
| H | -0.994220 | 5.256702  | -0.253905 |
| C | 0.816718  | 4.275127  | 0.552578  |
| H | 1.450446  | 5.099227  | 0.844898  |
| C | -2.203105 | 2.665672  | -0.606892 |
| C | -3.246453 | 3.754381  | -0.552461 |
| H | -3.197673 | 4.328673  | 0.374728  |
| H | -4.246032 | 3.325448  | -0.654994 |
| H | -3.095315 | 4.447785  | -1.391658 |
| C | -2.546458 | 1.578657  | -1.566131 |
| H | -3.416141 | 1.001889  | -1.223291 |
| H | -1.719260 | 0.907346  | -1.783548 |
| H | -2.847384 | 2.064055  | -2.505910 |
| N | -1.896420 | 0.310222  | 0.901707  |
| C | -2.932810 | -0.532369 | 0.678194  |
| C | -2.442251 | 1.521816  | 1.343665  |
| C | -4.145467 | 0.098167  | 1.049735  |
| H | -5.132418 | -0.337078 | 0.975684  |
| C | -3.828678 | 1.367609  | 1.501154  |
| H | -4.505846 | 2.120544  | 1.881611  |
| C | -2.862608 | -1.928603 | 0.115161  |
| C | -3.393709 | -2.878852 | 1.227678  |
| H | -3.411850 | -3.905378 | 0.851048  |
| H | -4.404267 | -2.597850 | 1.543391  |
| H | -2.732375 | -2.842915 | 2.098382  |
| C | -3.809900 | -2.029717 | -1.102545 |
| H | -3.836647 | -3.058828 | -1.470533 |
| H | -3.461289 | -1.388276 | -1.917569 |
| H | -4.831424 | -1.740752 | -0.837959 |
| N | -0.305806 | -1.856916 | 0.182292  |
| C | 0.716291  | -2.728805 | -0.150647 |
| C | -1.488999 | -2.412140 | -0.276106 |
| C | 0.186162  | -3.818011 | -0.816463 |
| H | 0.728258  | -4.679299 | -1.180563 |
| C | -1.212263 | -3.616027 | -0.899755 |
| H | -1.931124 | -4.304054 | -1.324495 |
| C | 2.100613  | -2.564235 | 0.426226  |
| C | 2.026594  | -2.990188 | 1.920467  |
| H | 3.014175  | -2.900448 | 2.387013  |
| H | 1.679449  | -4.026556 | 1.998584  |
| H | 1.327070  | -2.347595 | 2.461829  |
| C | 3.083886  | -3.501758 | -0.282770 |
| H | 3.191431  | -3.249848 | -1.342814 |
| H | 2.740458  | -4.536905 | -0.205370 |
| H | 4.068461  | -3.447831 | 0.190065  |
| C | 2.709014  | 1.015064  | 0.951821  |
| C | 2.615424  | -1.146405 | 0.392033  |
| C | 3.973020  | 0.649697  | 0.543958  |
| H | 4.851472  | 1.279011  | 0.523883  |

|    |           |           |           |
|----|-----------|-----------|-----------|
| C  | 3.911113  | -0.721530 | 0.184005  |
| H  | 4.741213  | -1.332161 | -0.141472 |
| Ga | 0.007086  | 0.087042  | 0.280369  |
| H  | -1.817599 | 2.243102  | 1.850446  |
| O  | 0.387681  | 0.176514  | -1.819744 |
| C  | 2.012127  | 0.386128  | -3.557872 |
| C  | 1.539361  | -1.064774 | -3.435503 |
| C  | 0.178678  | -0.892068 | -2.796437 |
| H  | 1.488197  | -1.587993 | -4.394461 |
| H  | -0.569008 | -0.540831 | -3.523716 |
| C  | 1.520901  | 1.017117  | -2.258503 |
| H  | 1.548130  | 0.865398  | -4.427752 |
| H  | 1.153798  | 2.041486  | -2.370252 |
| H  | 2.187398  | -1.625715 | -2.752766 |
| H  | 2.278576  | 0.979082  | -1.470886 |
| H  | -0.194262 | -1.770261 | -2.270207 |
| H  | 3.097695  | 0.476402  | -3.651660 |

[Et<sup>+</sup>1-thf]<sup>-</sup>

|                                                                            |                      |
|----------------------------------------------------------------------------|----------------------|
| Total correction:                                                          | 2443.1009 kJ/mol     |
| Final entropy term:                                                        | 309.2535 kJ/mol      |
| Final single point energy:                                                 | -9909082.7783 kJ/mol |
| Final enthalpy:                                                            | -9906637.1984 kJ/mol |
| Final Gibbs free enthalpy:                                                 | -9906946.4519 kJ/mol |
| COSMO-RS correction (CH <sub>2</sub> Cl <sub>2</sub> , enthalpy):          | -206.33 kJ/mol       |
| COSMO-RS correction (CH <sub>2</sub> Cl <sub>2</sub> , Gibbs free energy): | -197.52 kJ/mol       |

xyz, charge: -1, multiplicity: 1

|    |           |           |           |
|----|-----------|-----------|-----------|
| Ga | 0.019631  | 0.020973  | 0.129704  |
| O  | -0.002949 | 0.256230  | -1.914545 |
| N  | 1.596651  | -1.242224 | 0.146994  |
| N  | -1.284454 | -1.518153 | 0.088304  |
| N  | 1.296831  | 1.501318  | 0.511089  |
| N  | -1.525102 | 1.229958  | 0.461384  |
| C  | -0.923385 | -2.850480 | 0.098046  |
| C  | 1.490561  | -2.619379 | 0.141718  |
| C  | 1.031236  | 2.644109  | 1.242631  |
| C  | 2.653170  | 1.499517  | 0.218767  |
| C  | -3.619941 | 2.055889  | 0.516326  |
| H  | -4.684031 | 2.173774  | 0.364486  |
| C  | -1.496622 | 2.427007  | 1.152028  |
| C  | 2.204761  | 3.358851  | 1.409409  |
| H  | 2.321043  | 4.293884  | 1.939900  |
| C  | 3.225824  | 2.639987  | 0.756331  |
| H  | 4.264159  | 2.933444  | 0.683871  |
| C  | -2.776435 | 2.952727  | 1.200542  |
| H  | -3.078686 | 3.875837  | 1.675529  |
| C  | -3.492322 | 0.157369  | -2.230409 |
| H  | -3.867965 | -0.742644 | -2.735958 |
| H  | -2.484611 | 0.322694  | -2.620873 |
| C  | -1.851295 | -3.592494 | -0.605537 |
| H  | -1.842292 | -4.662765 | -0.759029 |
| C  | -2.837495 | 1.000434  | 0.075426  |
| C  | 2.760369  | -0.920270 | -0.531268 |
| C  | -3.341313 | -0.186827 | -0.713366 |
| C  | -2.474967 | -1.423715 | -0.612671 |
| C  | -0.298372 | 2.389666  | 3.349958  |
| H  | 0.524455  | 2.873962  | 3.894884  |
| H  | -1.242238 | 2.699128  | 3.820718  |
| C  | 0.323021  | -3.289263 | 0.820241  |
| C  | 2.548053  | -3.165334 | -0.559466 |
| H  | 2.741500  | -4.216370 | -0.725512 |
| C  | 0.192364  | 1.205253  | -4.066003 |
| H  | 1.258973  | 1.324871  | -4.284216 |
| H  | -0.369613 | 1.859013  | -4.739639 |
| C  | 3.404354  | 0.875461  | -2.119661 |
| H  | 2.377313  | 0.811874  | -2.485253 |
| H  | 3.967585  | 0.103071  | -2.661373 |
| C  | 0.450974  | -4.823672 | 0.740662  |
| H  | -0.514664 | -5.261250 | 1.021116  |
| H  | 0.615594  | -5.095232 | -0.309219 |

|   |           |           |           |
|---|-----------|-----------|-----------|
| C | -0.218360 | -0.270756 | -4.198672 |
| H | 0.313132  | -0.779862 | -5.007923 |
| H | -1.293809 | -0.355676 | -4.386751 |
| C | 3.369556  | 0.462872  | -0.612693 |
| C | -0.091084 | 1.533658  | -2.602125 |
| H | 0.638246  | 2.209497  | -2.143454 |
| H | -1.097778 | 1.935749  | -2.438363 |
| C | -0.293756 | 2.958539  | 1.890342  |
| C | -2.832535 | -2.681867 | -1.068681 |
| H | -3.734799 | -2.934704 | -1.611193 |
| C | -4.748007 | -0.572131 | -0.159313 |
| H | -5.169365 | -1.345218 | -0.815142 |
| H | -5.417421 | 0.292348  | -0.230856 |
| C | 0.127304  | -0.866539 | -2.839257 |
| H | -0.568702 | -1.642839 | -2.504367 |
| H | 1.160025  | -1.233101 | -2.774376 |
| C | 3.352267  | -2.083505 | -0.993561 |
| H | 4.295259  | -2.157862 | -1.520474 |
| C | -0.429348 | 4.497497  | 2.035607  |
| H | 0.394827  | 4.852086  | 2.666287  |
| H | -1.344449 | 4.705637  | 2.603415  |
| C | 4.839343  | 0.351286  | -0.107010 |
| H | 5.379129  | -0.311144 | -0.795830 |
| H | 5.324803  | 1.331201  | -0.180667 |
| C | 0.255711  | -2.831223 | 2.304695  |
| H | 0.217640  | -1.738312 | 2.327290  |
| H | 1.198715  | -3.101622 | 2.796760  |
| C | 3.969051  | 2.255971  | -2.444460 |
| H | 5.029963  | 2.337389  | -2.183572 |
| H | 3.879724  | 2.460305  | -3.518721 |
| H | 3.432192  | 3.036542  | -1.895764 |
| C | 4.968136  | -0.178180 | 1.318482  |
| H | 4.450156  | 0.481212  | 2.021809  |
| H | 4.524749  | -1.176337 | 1.396205  |
| H | 6.021741  | -0.242638 | 1.615844  |
| C | -4.722099 | -1.076974 | 1.280221  |
| H | -4.123340 | -1.990784 | 1.354654  |
| H | -4.279792 | -0.323401 | 1.940216  |
| H | -5.735675 | -1.297077 | 1.635862  |
| C | -4.370930 | 1.353423  | -2.588121 |
| H | -4.361269 | 1.517538  | -3.672676 |
| H | -5.413783 | 1.199845  | -2.289850 |
| H | -4.013755 | 2.263831  | -2.096661 |
| C | 1.545400  | -5.437084 | 1.616989  |
| H | 1.280795  | -5.395069 | 2.679066  |
| H | 1.693802  | -6.492214 | 1.358754  |
| H | 2.499948  | -4.917631 | 1.491764  |
| C | -0.940505 | -3.375954 | 3.079935  |
| H | -0.906568 | -4.466838 | 3.181673  |
| H | -0.971876 | -2.948296 | 4.088437  |
| H | -1.874595 | -3.116561 | 2.569885  |
| C | -0.148598 | 0.877052  | 3.453000  |
| H | -0.977030 | 0.364618  | 2.949777  |
| H | 0.797643  | 0.547766  | 3.007399  |
| H | -0.149663 | 0.554200  | 4.500584  |
| C | -0.444693 | 5.279191  | 0.724303  |
| H | -1.282326 | 4.963216  | 0.094872  |
| H | -0.543288 | 6.354698  | 0.915786  |
| H | 0.482000  | 5.112698  | 0.166268  |

## S12. References

1. Fulmer, G. R.; Miller, A. J. M.; Sherden, N. H.; Gottlieb, H. E.; Nudelman, A.; Stoltz, B. M.; Bercaw, J. E.; Goldberg, K. I., NMR Chemical Shifts of Trace Impurities: Common Laboratory Solvents, Organics, and Gases in Deuterated Solvents Relevant to the Organometallic Chemist. *Organometallics* **2010**, *29* (9), 2176-2179.
2. Bruker TopSpin 4.0.7, **2019**, <https://www.bruker.com/products/mr/nmr/software/topspin.html>.
3. Mestrelab Research S.L. MestReNova v14.0.1-23559, **2019**, <https://mestrelab.com/>.
4. OriginPro 64-bit, Version **2020**, *OriginLab Corporation*, Northampton, MA, USA.
5. Neese, F., The ORCA program system. *Wiley Interdiscip. Rev. Comput. Mol. Sci.* **2012**, *2* (1), 73-78.
6. Neese, F., Software update: the ORCA program system, version 4.0. *Wiley Interdiscip. Rev. Comput. Mol. Sci.* **2018**, *8* (1), e1327.
7. Baeyer, A., Ueber ein Condensationsproduct von Pyrrol mit Aceton. *Ber. Dtsch. Chem. Ges.* **1886**, *19* (2), 2184-2185.
8. Depraetere, S.; Smet, M.; Dehaen, W., N-Confused Calix[4]pyrroles. *Angew. Chem. Int. Ed.* **1999**, *38* (22), 3359-3361.
9. Transue, W. J.; Dai, Y.; Riu, M.-L. Y.; Wu, G.; Cummins, C. C., 31P NMR Chemical Shift Tensors: Windows into Ruthenium Phosphinidene Complex Electronic Structures. *Inorg. Chem.* **2021**, *60* (13), 9254-9258.
10. Maelia, L. E.; Koch, S. A., Gallium Analogues of Iron-Sulfide-Thiolate Compounds. Analysis of the Structural Parameters in Gallium(III) and Iron(III) Chalcogenide Compounds. *ChemInform* **1986**, *17*.
11. Jacoby, D.; Floriani, C.; Chiesi-Villa, A.; Rizzoli, C., Zirconium meso-octaethylporphyrinogen as a carrier for sodium hydride in toluene: zirconium-sodium bimetallic hydride and alkyls. *J. Am. Chem. Soc.* **1993**, *115* (9), 3595-3602.
12. APEX3, Bruker AXS Inc., Madison, Wisconsin, USA, <https://www.bruker.com/content/bruker/int/en/products-and-solutions/diffractometers-and-scattering-systems/single-crystal-x-ray-diffractometers/sc-xrd-software/apex3-proteum3.html>.
13. Otwinowski, Z.; Minor, W., Processing of X-ray diffraction data collected in oscillation mode. *Methods Enzymol.* **1997**, *276*, 307-26.
14. SAINT, Bruker AXS GmbH, Karlsruhe, Germany, 2016.
15. Sheldrick, G. M., SADABS, Bruker AXS GmbH, Karlsruhe, Germany, 2016.
16. Sheldrick, G. M., SHELXT, Program for Crystal Structure Solution, University of Göttingen, Germany, 2014.
17. Sheldrick, G. M., SHELXT - Integrated space-group and crystal-structure determination. *Acta Crystallogr. A* **2015**, (71), 3-8.
18. Robinson, W.; Sheldrick, G. M., Crystallographic Computing 4. Isaacs, N. W.; Taylor, M. R., Eds. Ch. 22, IUCr and Oxford University Press, Oxford, UK, 1988.
19. Sheldrick, G. M., A short history of SHELX. *Acta Crystallogr. A* **2008**, *64* (1), 112-122.
20. Sheldrick, G. M., SHELXL-20xx, University of Göttingen and Bruker AXS GmbH, Karlsruhe, Germany, 2012.
21. Sheldrick, G. M., Crystal structure refinement with SHELXL. *Acta Crystallogr. C* **2015**, *71* (1), 3-8.
22. Hubschle, C. B.; Sheldrick, G. M.; Dittrich, B., ShelXle: a Qt graphical user interface for SHELXL. *J. Appl. Crystallogr.* **2011**, *44* (6), 1281-1284.
23. Dolomanov, O. V.; Bourhis, L. J.; Gildea, R. J.; Howard, J. A. K.; Puschmann, H., OLEX2: a complete structure solution, refinement and analysis program. *J. Appl. Crystallogr.* **2009**, *42* (2), 339-341.
24. Bruno, I. J.; Cole, J. C.; Edgington, P. R.; Kessler, M.; Macrae, C. F.; McCabe, P.; Pearson, J.; Taylor, R., New software for searching the Cambridge Structural Database and visualizing crystal structures. *Acta Crystallogr. B* **2002**, *58* (3 Part 1), 389-397.
25. Macrae, C. F.; Edgington, P. R.; McCabe, P.; Pidcock, E.; Shields, G. P.; Taylor, R.; Towler, M.; van de Streek, J., Mercury: visualization and analysis of crystal structures. *J. Appl. Crystallogr.* **2006**, *39* (3), 453-457.

26. Macrae, C. F.; Sovago, I.; Cottrell, S. J.; Galek, P. T. A.; McCabe, P.; Pidcock, E.; Platings, M.; Shields, G. P.; Stevens, J. S.; Towler, M.; Wood, P. A., Mercury 4.0: from visualization to analysis, design and prediction. *J. Appl. Crystallogr.* **2020**, *53* (1), 226-235.
27. Andrienko, G. A. <https://www.chemcraftprog.com>.
28. Pracht, P.; Bohle, F.; Grimme, S., Automated exploration of the low-energy chemical space with fast quantum chemical methods. *Phys. Chem. Chem. Phys.* **2020**, *22* (14), 7169-7192.
29. Bannwarth, C.; Caldeweyher, E.; Ehlert, S.; Hansen, A.; Pracht, P.; Seibert, J.; Spicher, S.; Grimme, S., Extended tight-binding quantum chemistry methods. *Wiley Interdiscip. Rev. Comput. Mol. Sci.* **2021**, *11* (2), e1493.
30. Grimme, S.; Hansen, A.; Ehlert, S.; Mewes, J.-M., r2SCAN-3c: A "Swiss army knife" composite electronic-structure method. *J. Chem. Phys.* **2021**, *154* (6), 064103.
31. Stoychev, G. L.; Auer, A. A.; Neese, F., Automatic Generation of Auxiliary Basis Sets. *J. Chem. Theory Comput.* **2017**, *13* (2), 554-562.
32. Neese, F.; Wennmohs, F.; Hansen, A.; Becker, U., Efficient, approximate and parallel Hartree–Fock and hybrid DFT calculations. A 'chain-of-spheres' algorithm for the Hartree–Fock exchange. *Chem. Phys.* **2009**, *356* (1), 98-109.
33. Neese, F., An improvement of the resolution of the identity approximation for the formation of the Coulomb matrix. *J. Comput. Chem.* **2003**, *24* (14), 1740-1747.
34. Kozuch, S.; Martin, J. M. L., DSD-PBEP86: in search of the best double-hybrid DFT with spin-component scaled MP2 and dispersion corrections. *Phys. Chem. Chem. Phys.* **2011**, *13* (45), 20104-20107.
35. Kozuch, S.; Martin, J. M. L., Spin-component-scaled double hybrids: An extensive search for the best fifth-rung functionals blending DFT and perturbation theory. *J. Comput. Chem.* **2013**, *34* (27), 2327-2344.
36. Grimme, S.; Antony, J.; Ehrlich, S.; Krieg, H., A consistent and accurate ab initio parametrization of density functional dispersion correction (DFT-D) for the 94 elements H-Pu. *J. Chem. Phys.* **2010**, *132* (15).
37. Grimme, S.; Ehrlich, S.; Goerigk, L., Effect of the Damping Function in Dispersion Corrected Density Functional Theory. *J. Comput. Chem.* **2011**, *32* (7), 1456-1465.
38. Weigend, F.; Ahlrichs, R., Balanced basis sets of split valence, triple zeta valence and quadruple zeta valence quality for H to Rn: Design and assessment of accuracy. *Phys. Chem. Chem. Phys.* **2005**, *7* (18), 3297-3305.
39. Grimme, S., Supramolecular Binding Thermodynamics by Dispersion-Corrected Density Functional Theory. *Chem. Eur. J.* **2012**, *18* (32), 9955-9964.
40. Klamt, A., Conductor-like Screening Model for Real Solvents: A New Approach to the Quantitative Calculation of Solvation Phenomena. *J. Phys. Chem.* **1995**, *99* (7), 2224-2235.
41. Klamt, A.; Jonas, V.; Bürger, T.; Lohrenz, J. C. W., Refinement and Parametrization of COSMO-RS. *J. Phys. Chem. A* **1998**, *102* (26), 5074-5085.
42. Klamt, A., *COSMO-RS From Quantum Chemistry to Fluid Phase Thermodynamics and Drug Design*. Elsevier Science Amsterdam, 2005.
43. Pye, C. C.; Ziegler, T.; van Lenthe, E.; Louwen, J. N., An implementation of the conductor-like screening model of solvation within the Amsterdam density functional package — Part II. COSMO for real solvents. *Can. J. Chem.* **2009**, *87* (7), 790-797.
44. Baerends, E. J.; Ziegler, T.; Atkins, A. J.; Autschbach, J.; Bashford, D.; Baseggio, O.; Brces, A.; Bickelhaupt, F. M.; Bo, C.; Boerritger, P. M.; Cavallo, L.; Daul, C.; Chong, D. P.; Chulhai, D. V.; Deng, L.; Dickson, R. M.; Dieterich, J. M.; Ellis, D. E.; van Faassen, M.; Ghysels, A.; Giammona, A.; van Gisbergen, S. J. A.; Goetz, A.; Gtz, A. W.; Gusarov, S.; Harris, F. E.; van den Hoek, P.; Hu, Z.; Jacob, C. R.; Jacobsen, H.; Jensen, L.; Joubert, L.; Kaminski, J. W.; van Kessel, G.; Knig, C.; Kootstra, F.; Kovalenko, A.; Krykunov, M.; van Lenthe, E.; McCormack, D. A.; Michalak, A. M.; Morton, S. M.; Neugebauer, J.; Nicu, V. P.; Noodleman, L.; Osinga, V. P.; Patchkovskii, S.; Pavanello, M.; Peeples, C. A.; Philipsen, P. H. T.; Post, D.; Pye, C. C.; Ramanantoanina, H.; Ramos, P.; Ravenek, W.; Rodriguez, J. I.; Ros, P.; Rger, R.; Schipper, P. R. T.; Schlins, D.; van Schoot, H.; Schreckenbach, G.; Seldenthuis, J. S.; Seth, M.; Snijders, J. G. SCM, Theoretical Chemistry, Vrije Universiteit, Amsterdam, The Netherlands, <https://www.scm.com>.
45. Glendening, E. D.; Landis, C. R.; Weinhold, F., NBO 6.0: Natural bond orbital analysis program. *J. Comput. Chem.* **2013**, *34* (16), 1429-1437.
46. Erdmann, P.; Leitner, J.; Schwarz, J.; Greb, L., An Extensive Set of Accurate Fluoride Ion Affinities for p-Block Element Lewis Acids and Basic Design Principles for Strong Fluoride Ion Acceptors. *ChemPhysChem* **2020**, *21* (10), 987-994.

47. Ebner, F.; Sigmund, L. M.; Greb, L., Metal–Ligand Cooperativity of the Calix[4]pyrrolato Aluminate: Triggerable C–C Bond Formation and Rate Control in Catalysis. *Angew. Chem. Int. Ed.* **2020**, *59* (39), 17118-17124.
